# Supplementary material for: Combinatorial bZIP dimers display complex DNA-binding specificity landscapes
Source: eLife journal article supplement (doi:10.7554/elife.19272), 2017-02-10

**Supplementary file 2.** MEME motifs and Sequence Specificity and Energy Landscapes (SEL) for human bZIP homodimers and heterodimers. **column 1**, bZIP dimer and dissociation constant of bZIP dimerization in the absence of DNA, from Reinke et al. (Science, 2013); **column 2**, Representative MEME motifs derived using the top 1,000 12-mer sequences ranked by CSI intensity; **column 3**, SEL displaying CSI intensities of 12-mer sequences in the 0-, 1-, 2- mismatch rings. Seed motifs used to draw SELs are shown on top; **column 4**, Box plot of CSI intensities corresponding to the first three rings (0-, 1-, 2-mismatch rings) of the SEL. bZIP heterodimer motifs were classified as Conjoined (C), Variably-spaced (V), or Emergent (E) based on the DNA binding preferences of the composing bZIPs and a notation of the category included between columns 2 and 3. Multiple MEME motifs were identified for some homodimers and heterodimers. In such cases, motifs are bracketed in column 1.

| Homodimer<br>(PPI, Kd) | MEME motif                                                                          | Sequence Specificity &<br>Energy Landscape (SEL)                                                   | Box plot for SEL rings                                                                |
|------------------------|-------------------------------------------------------------------------------------|----------------------------------------------------------------------------------------------------|---------------------------------------------------------------------------------------|
| ATF2<br>(32 nM)        | 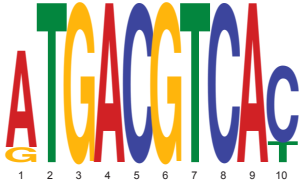   | ATGACGTCAT<br>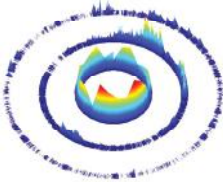   | 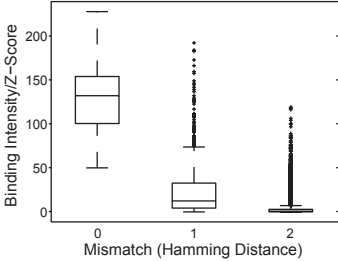   |
| ATF3<br>(218 nM)       | 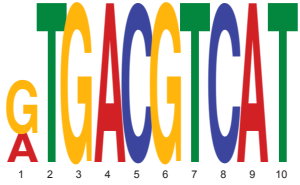  | ATGACGTCAT<br>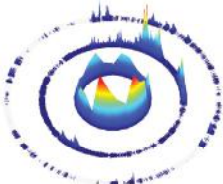  | 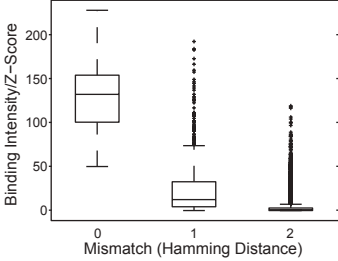  |
| ATF4<br>(412 nM)       | 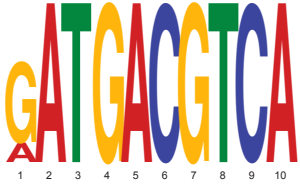 | ATGACGTCAT<br>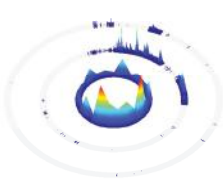 | 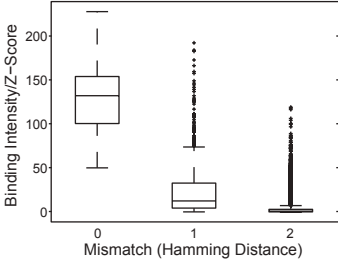 |
| ATF6<br>(27 nM)        | 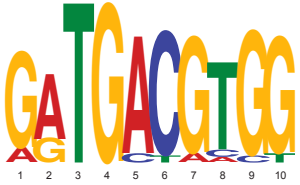 | ATGACGTGGC<br>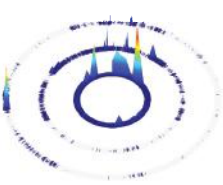 | 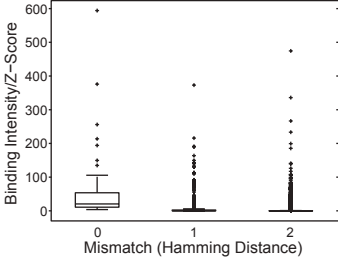 |
| ATF6<br>(27 nM)        | 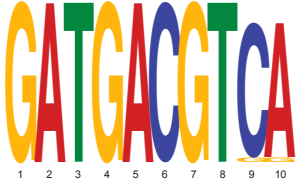 | ATGACGTCAT<br>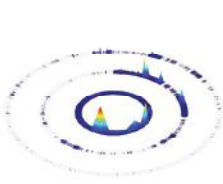 | 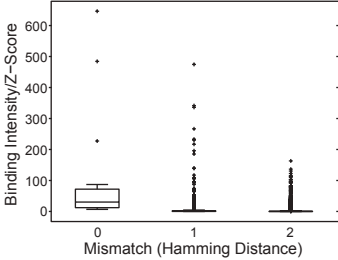 |

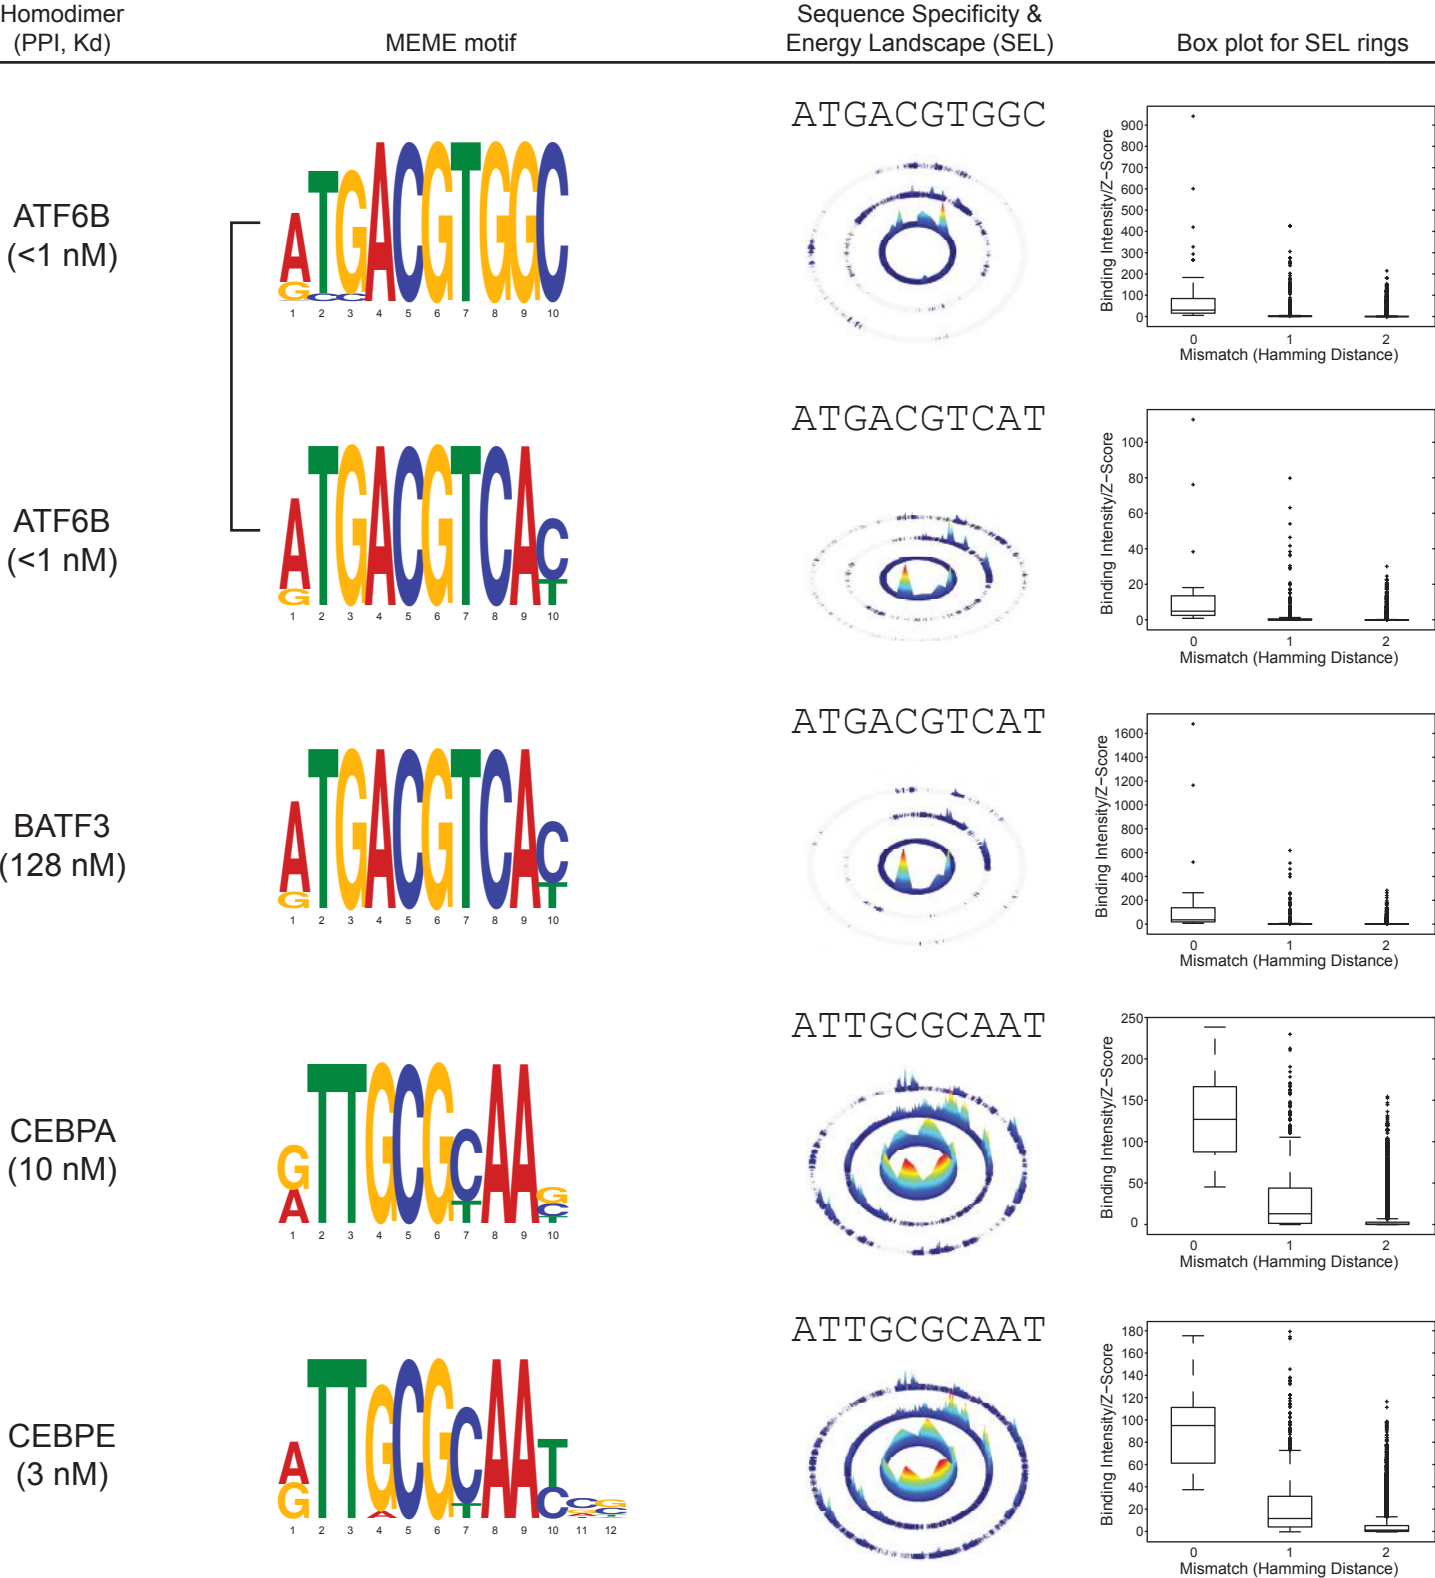

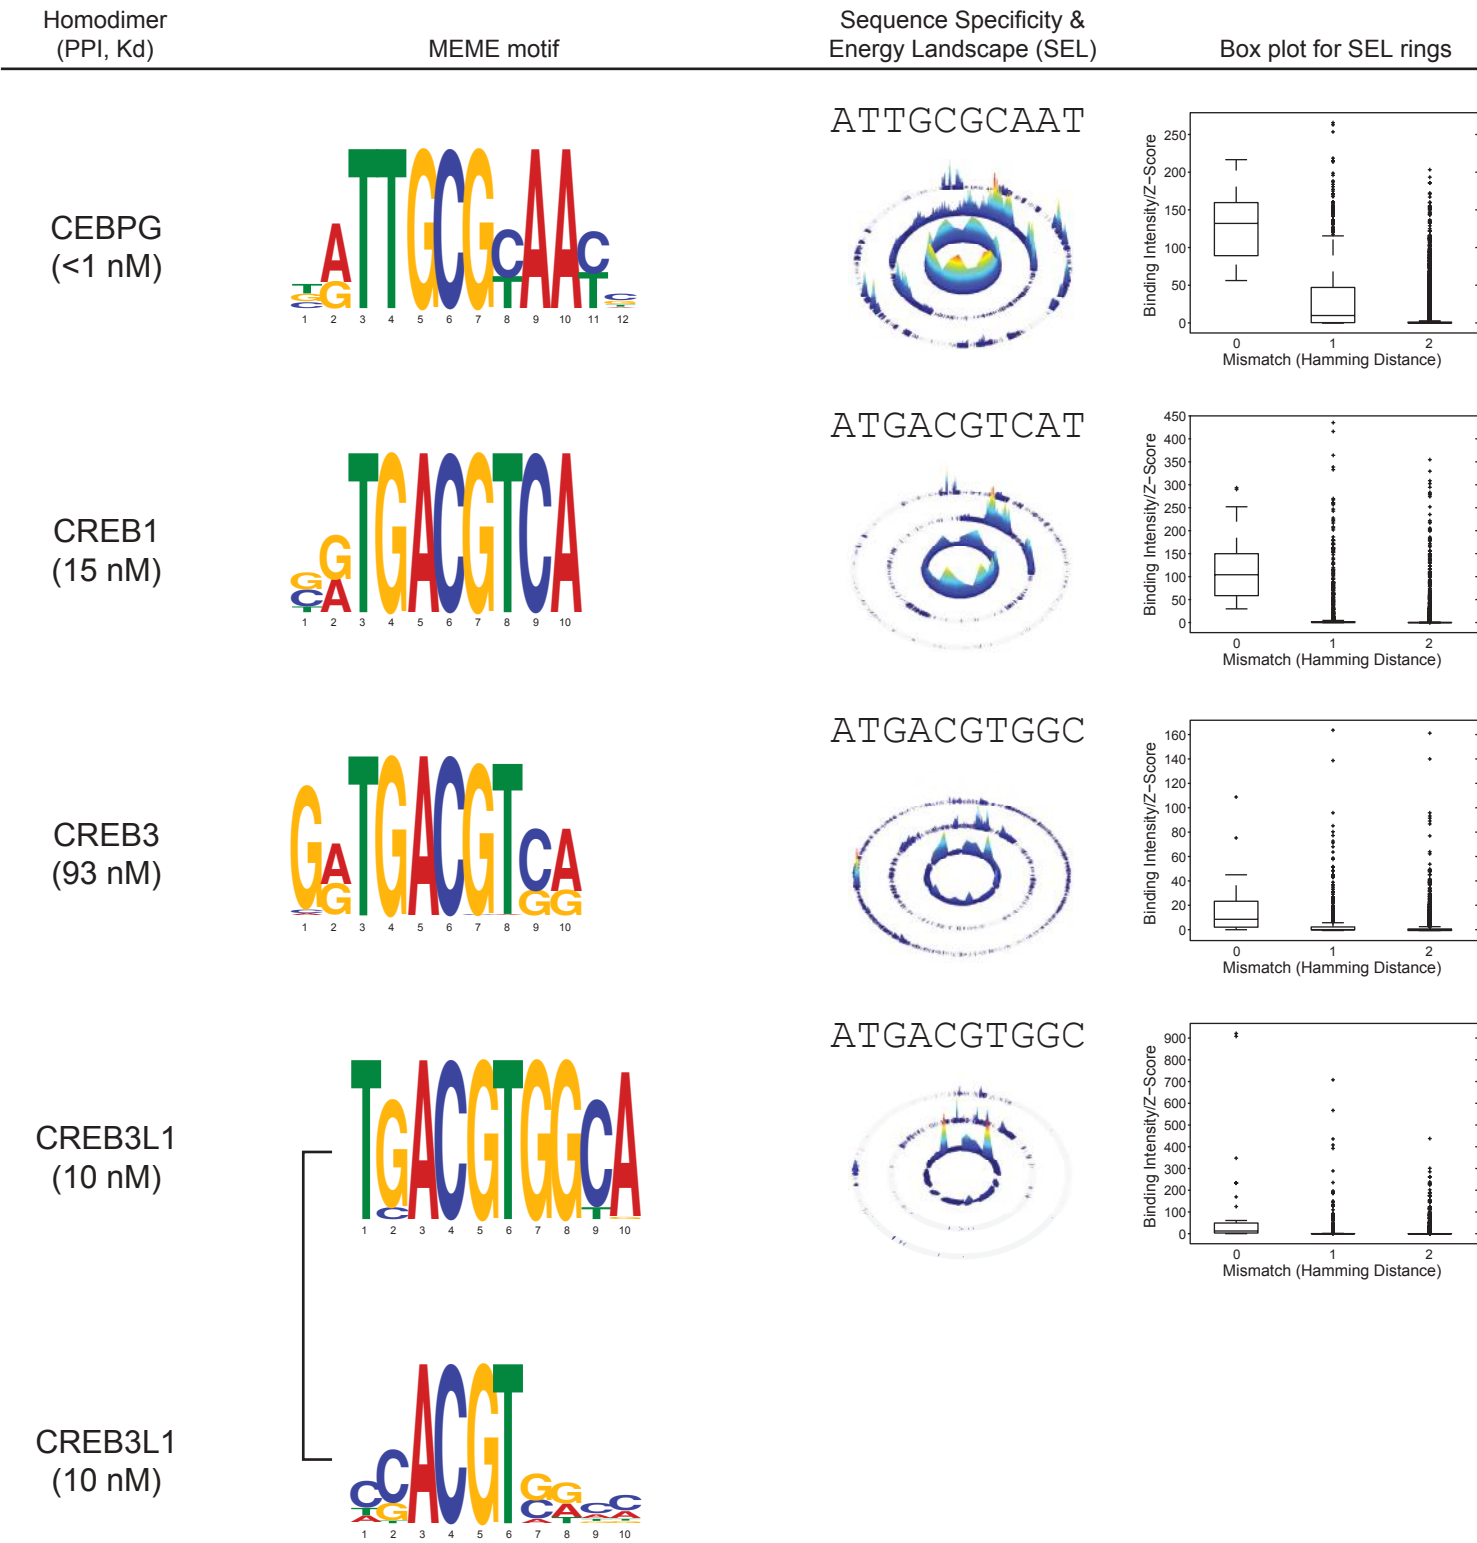

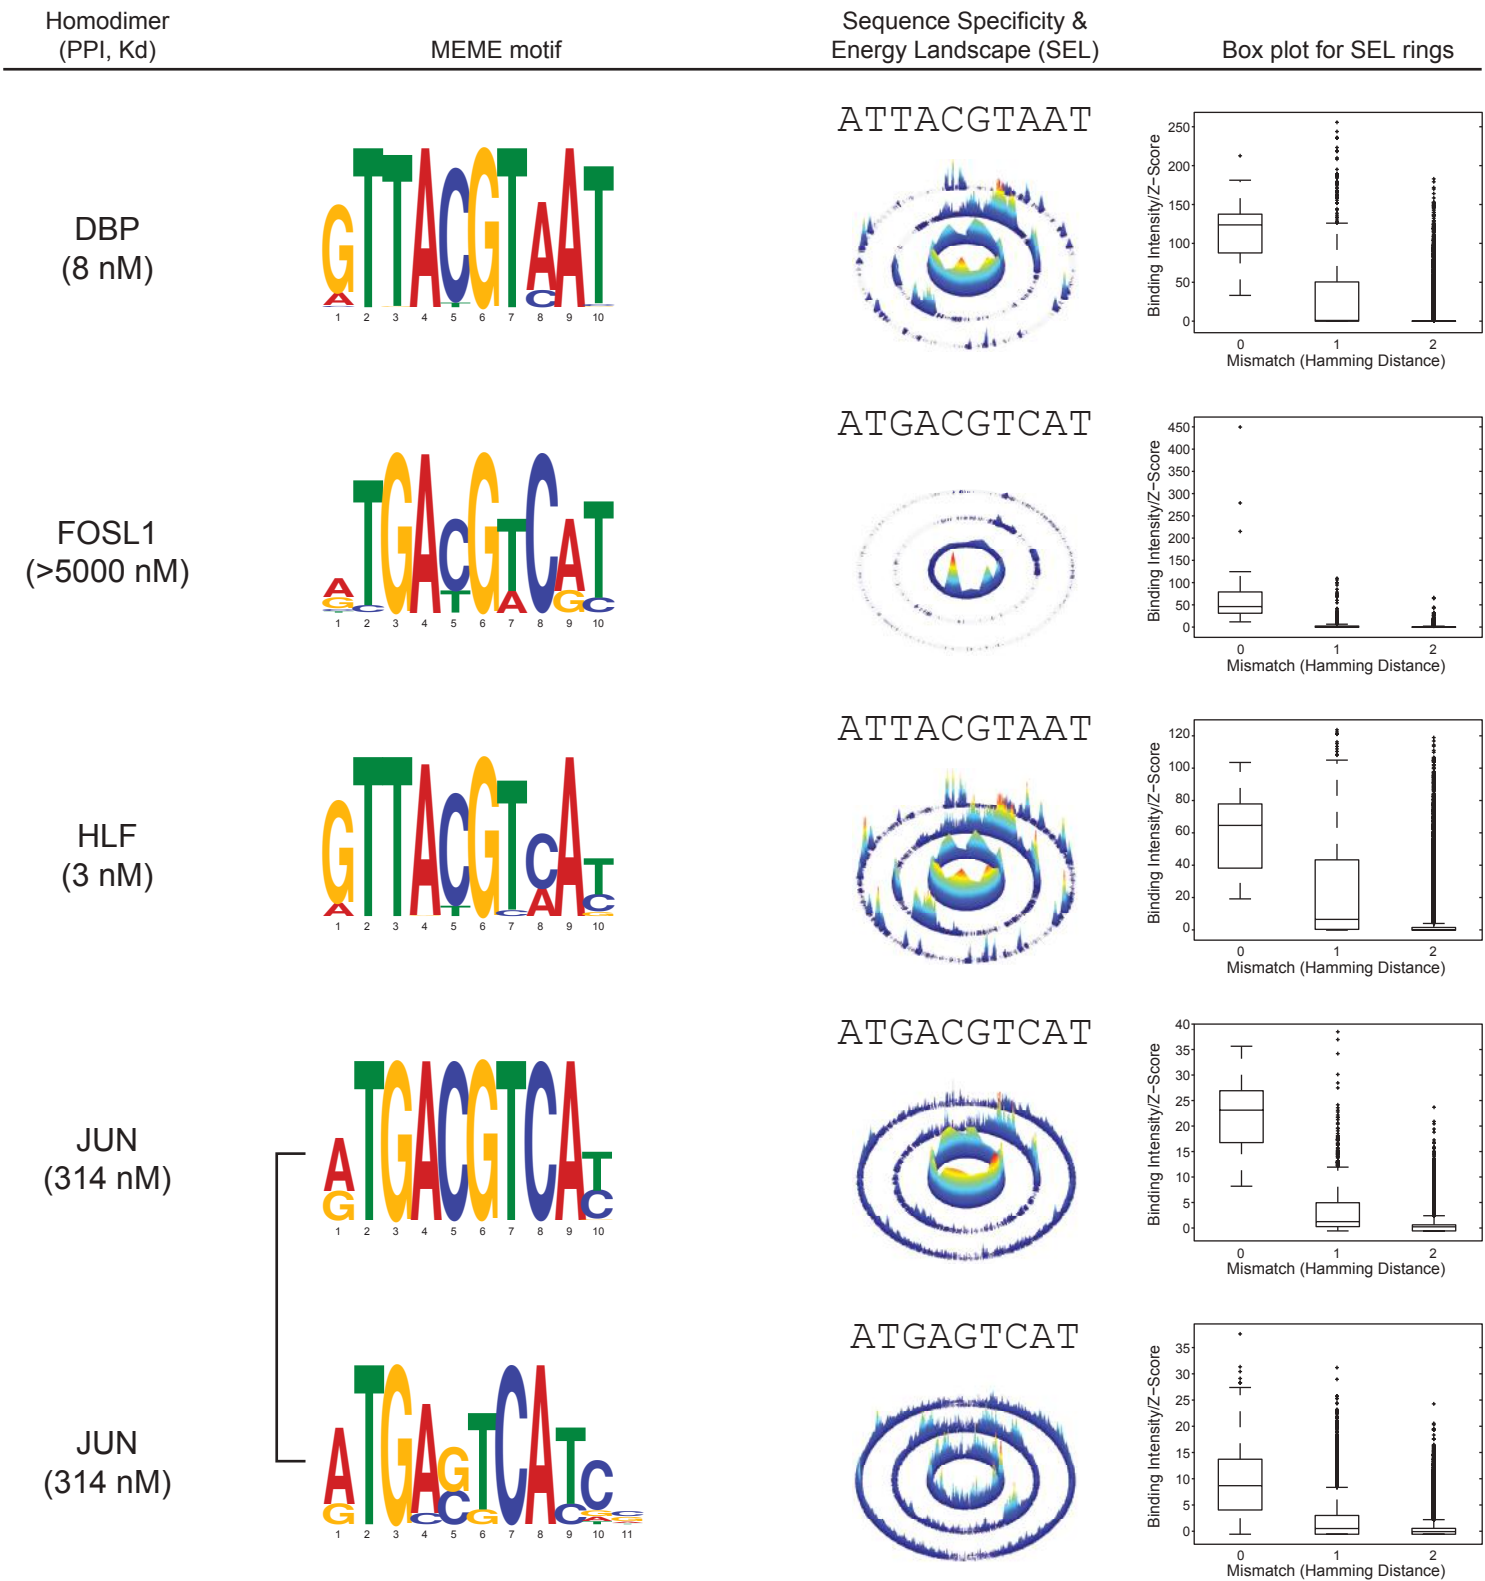

Homodimer  
(PPI, Kd)

MEME motif

Sequence Specificity &  
Energy Landscape (SEL)

Box plot for SEL rings

MAFB  
(62 nM)

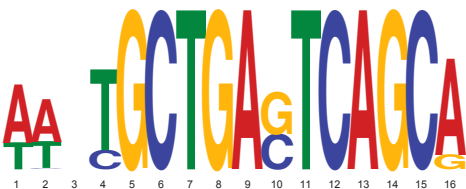

TGCTGAGTCAGCA

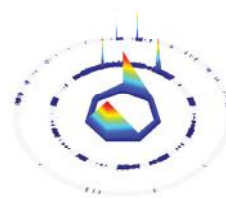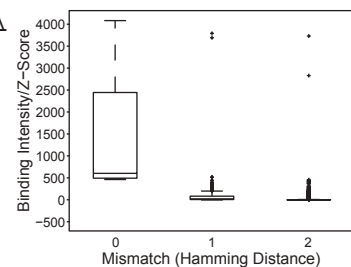

MAFG  
(15 nM)

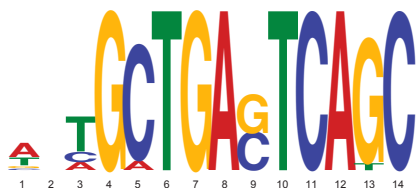

TGCTGAGTCAGCA

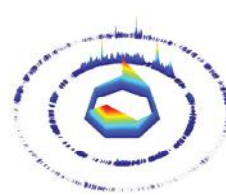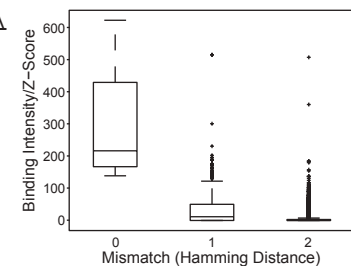

NFE2  
(656 nM)

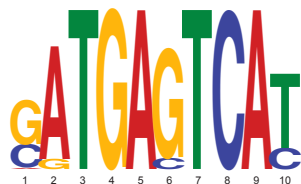

ATGAGTCAT

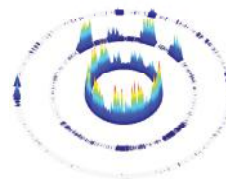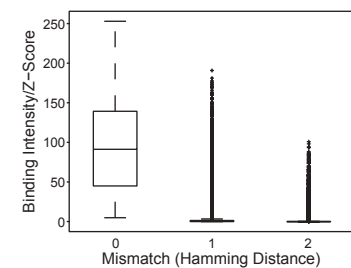

NFE2L1  
(27 nM)

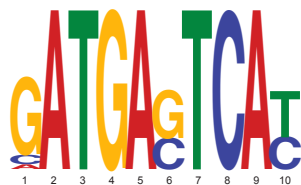

ATGAGTCAT

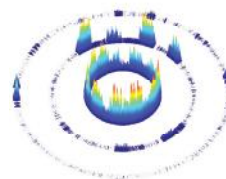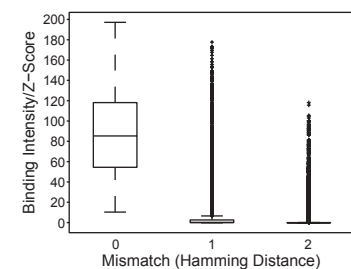

NFIL3  
(73 nM)

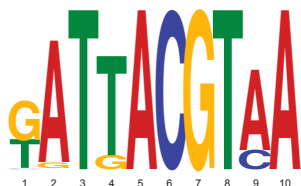

ATTACGTAAT

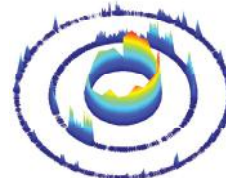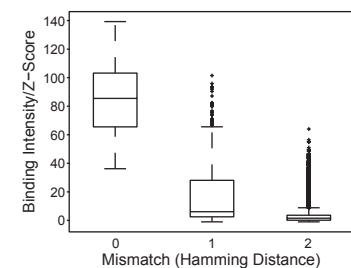

XBP1  
(8 nM)

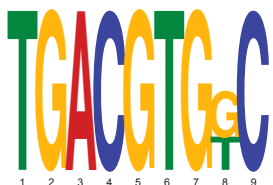

ATGACGTGGC

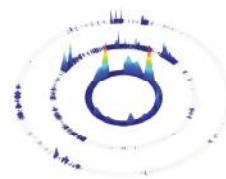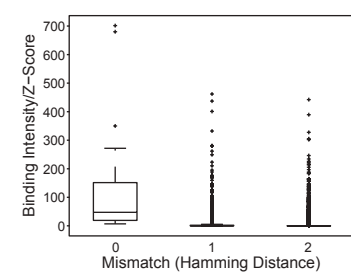

| Heterodimer<br>(PPI, Kd) | MEME motif and classification as<br>(i) conjoined half-sites (C),<br>(ii) conjoined half-site with a variable spacer (V), or as<br>(iii) emergent (E) based on homodimer specificity. | Sequence Specificity &<br>Energy Landscape (SEL) | Box plot for SEL rings                                                               |                                                                                       |
|--------------------------|---------------------------------------------------------------------------------------------------------------------------------------------------------------------------------------|--------------------------------------------------|--------------------------------------------------------------------------------------|---------------------------------------------------------------------------------------|
| ATF3•CEBPA<br>(13 nM)    | 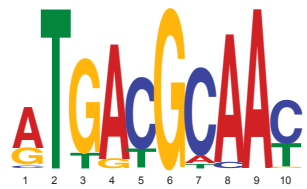                                                                                                     | C                                                | 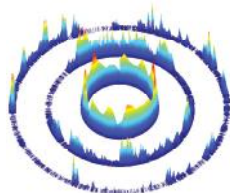   | 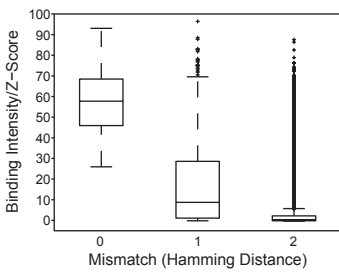   |
| ATF3•CEBPG<br>( $<1$ nM) | 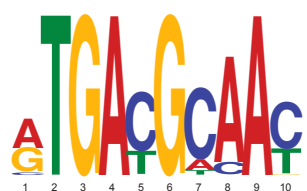                                                                                                     | C                                                | 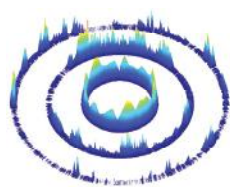   | 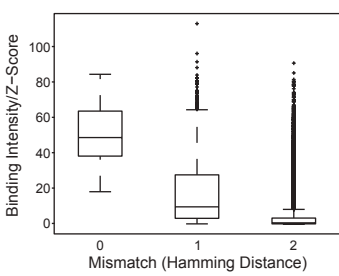   |
| ATF4•CEBPA<br>( $<1$ nM) | 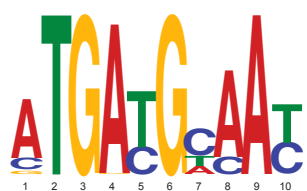                                                                                                    | C                                                | 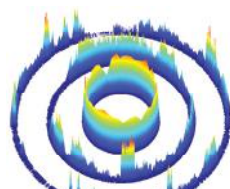  | 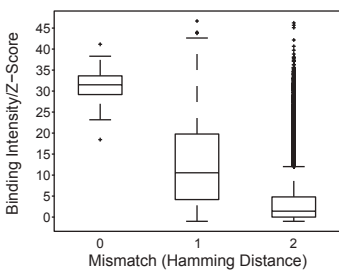  |
| ATF4•CEBPG<br>( $<1$ nM) | 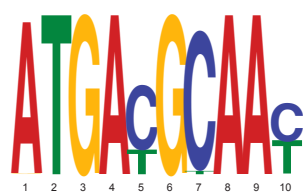                                                                                                   | C                                                | 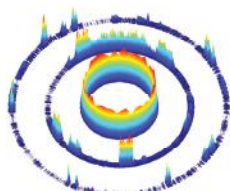 | 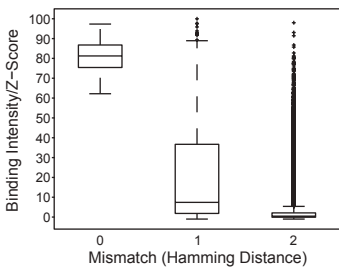 |
| ATF5•CEBPA<br>(54 nM)    | 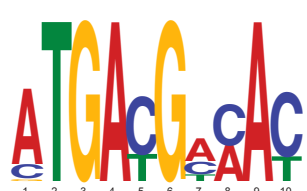                                                                                                   | C                                                | 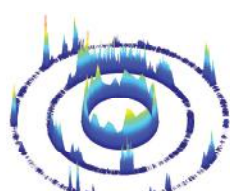 | 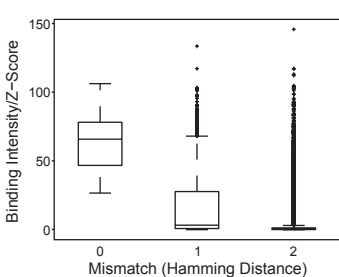 |
| ATF5•CEBPE<br>(28 nM)    | 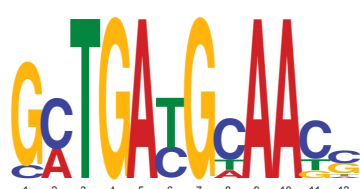                                                                                                   | C                                                | 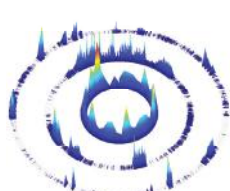 | 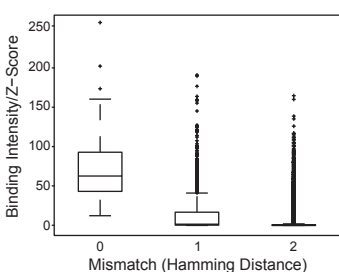 |

Heterodimer  
(PPI, Kd)

MEME motif and classification as  
(i) conjoined half-sites (C),  
(ii) conjoined half-site with a variable spacer (V), or as  
(iii) emergent (E) based on homodimer specificity.

SeqEence Specificity &  
Energy Landscape (SEL)

Box plot for SEL rings

ATF5•CEBPG  
(<1 nM)

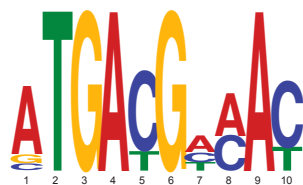

C

ATGACGCAAT

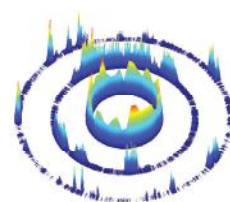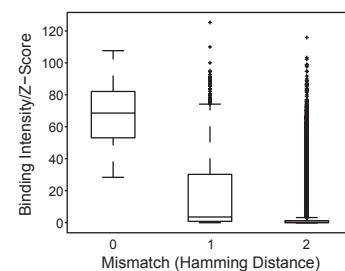

ATF5•ATF6B  
(>5000 nM)

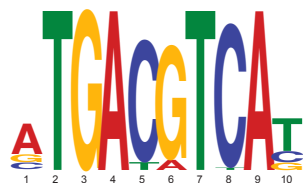

C

ATGACGTCAT

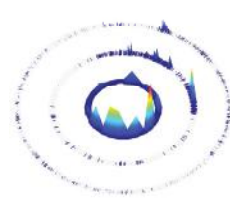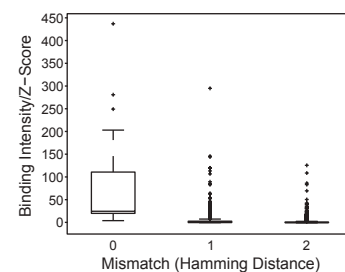

ATF5•BATF  
(187 nM)

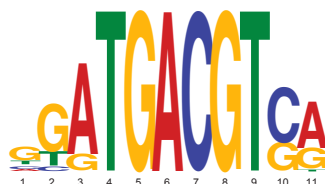

C

ATGACGTCAT

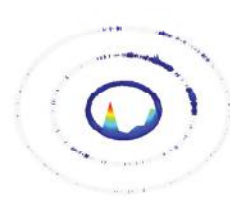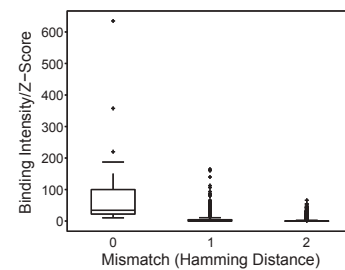

ATF5•BATF2  
(>5000 nM)

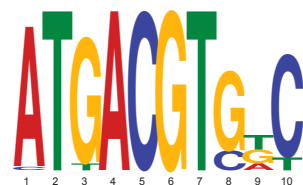

E

ATGACGTGGC

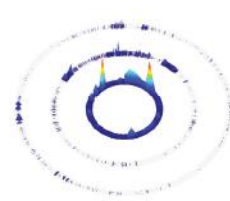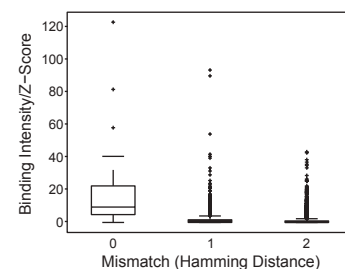

ATF5•BATF3  
(385 nM)

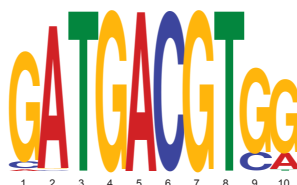

E

ATGACGTGGC

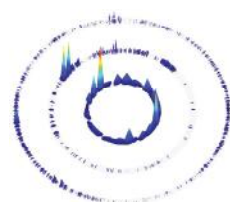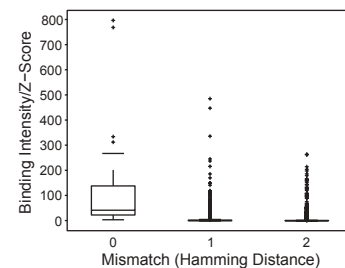

ATF5•CREBZF  
(1541 nM)

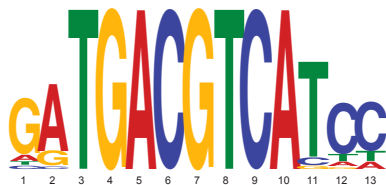

C

ATGACGTCAT

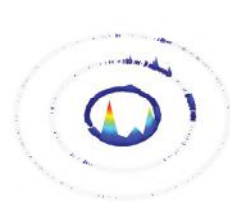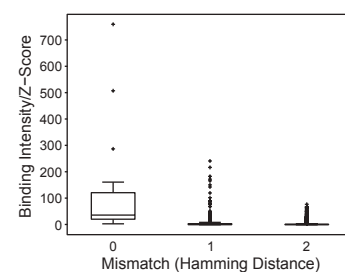

Heterodimer  
(PPI, Kd)

MEME motif and classification as  
(i) conjoined half-sites (C),  
(ii) conjoined half-site with a variable spacer (V), or as  
(iii) emergent (E) based on homodimer specificity.

Sequence Specificity &  
Energy Landscape (SEL)

Box plot for SEL rings

ATF5•CREB3L1  
(>5000 nM)

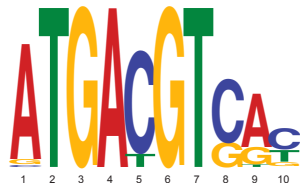

C

ATGACGTCAT

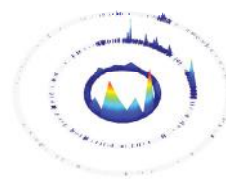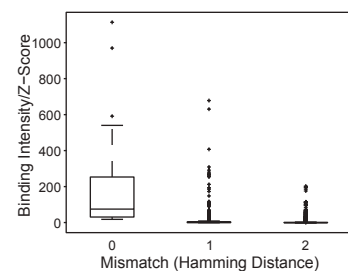

ATF5•CREB3L3  
(>5000 nM)

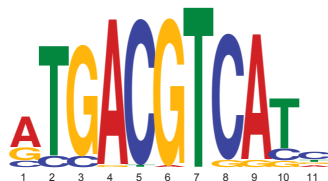

C

ATGACGTCAT

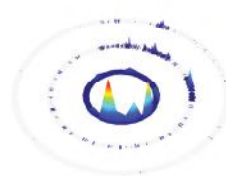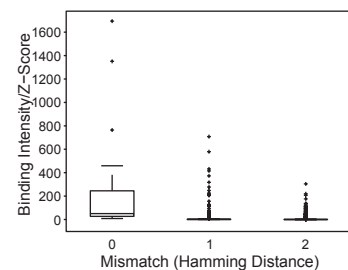

ATF5•FOS  
(>5000 nM)

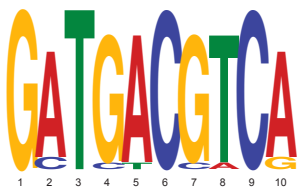

C

ATGACGTCAT

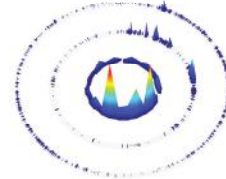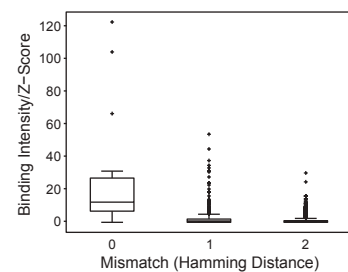

ATF5•JUN  
(>5000 nM)

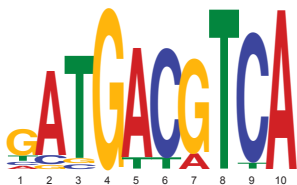

C

ATGACGTCAT

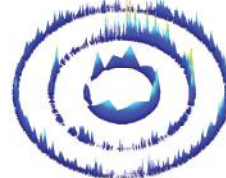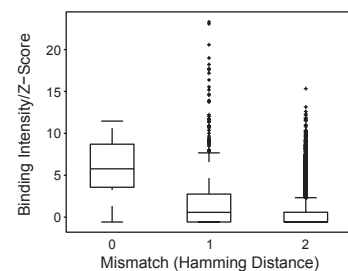

ATF5•JUNB  
(>5000 nM)

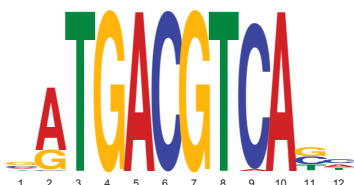

C

ATGACGTCAT

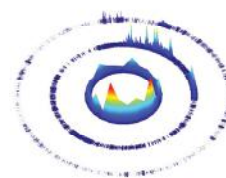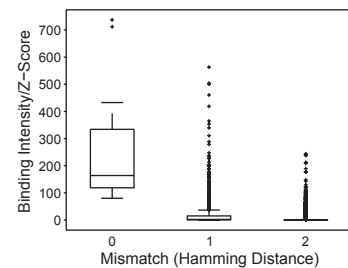

BATF•ATF3  
(17 nM)

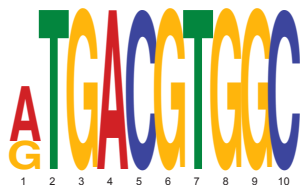

E

ATGACGTGGC

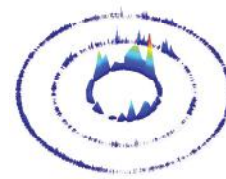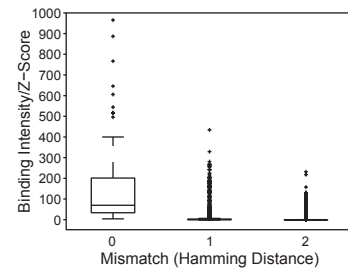

Heterodimer  
(PPI, Kd)

MEME motif and classification as  
(i) conjoined half-sites (C),  
(ii) conjoined half-site with a variable spacer (V), or as  
(iii) emergent (E) based on homodimer specificity.

Sequence Specificity &  
Energy Landscape (SEL)

Box plot for SEL rings

BATF•CEBPA  
(10 nM)

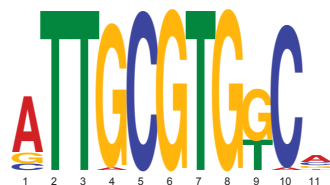

E

ATTGCGTGGC

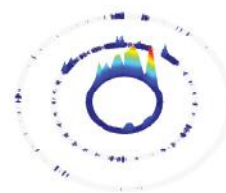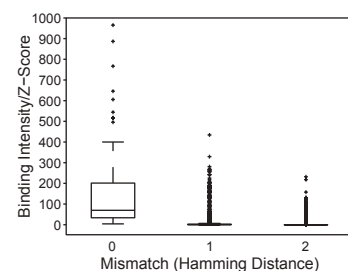

BATF•CEBPE  
(23 nM)

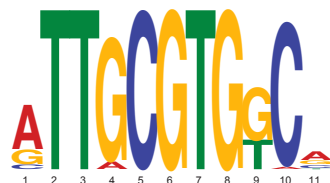

E

ATTGCGTGGC

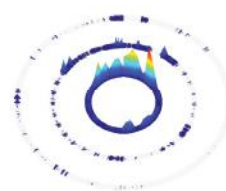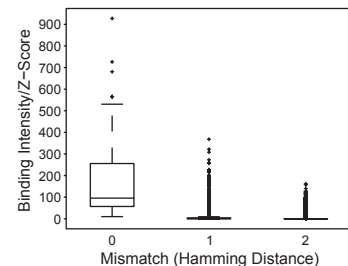

BATF•CEBPG  
(<1 nM)

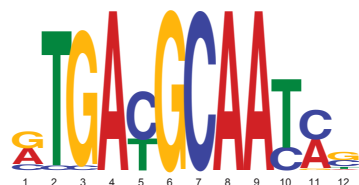

C

ATGACGCAAT

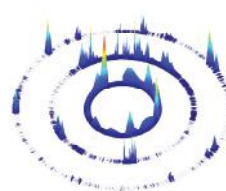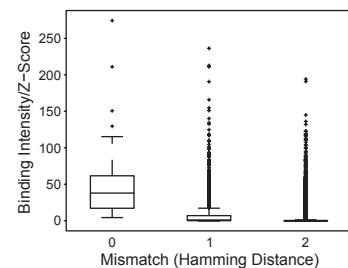

BATF•CEBPG  
(<1 nM)

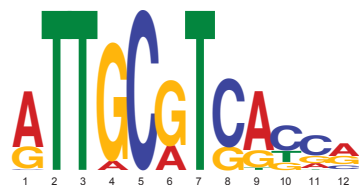

C

ATTGCGTGGC

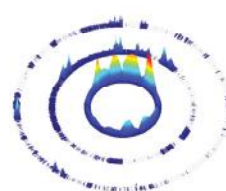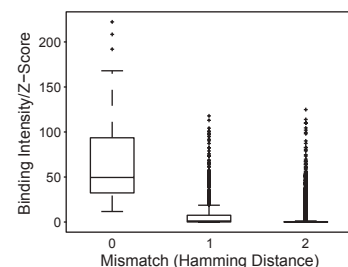

BATF•HLF  
(21 nM)

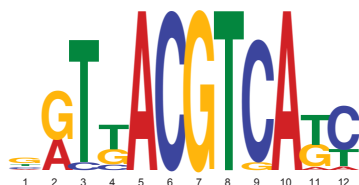

C

ATGACGTCAT

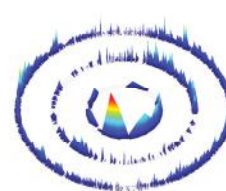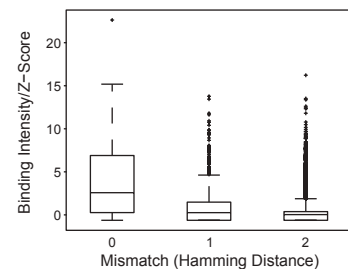

BATF•NFIL3  
(291 nM)

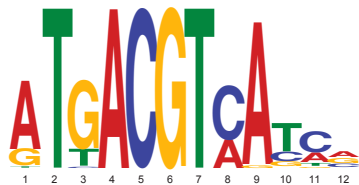

C

ATGACGTCAT

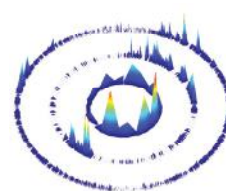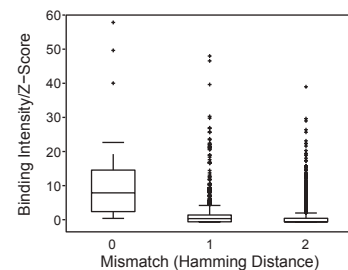

Heterodimer  
(PPI, Kd)

MEME motif and classification as  
(i) conjoined half-sites (C),  
(ii) conjoined half-site with a variable spacer (V), or as  
(iii) emergent (E) based on homodimer specificity.

Sequence Specificity &  
Energy Landscape (SEL)

Box plot for SEL rings

BATF2•ATF3  
(429 nM)

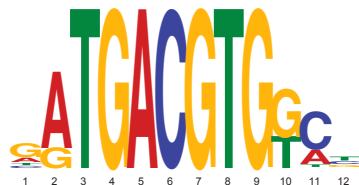

E

ATGACGTGGC

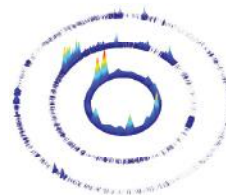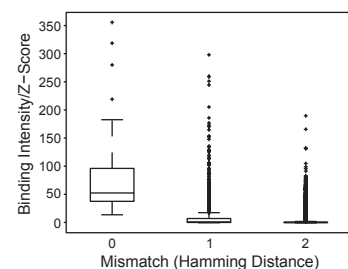

BATF2•ATF4  
(11 nM)

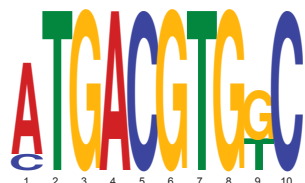

E

ATGACGTGGC

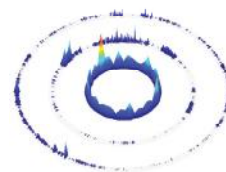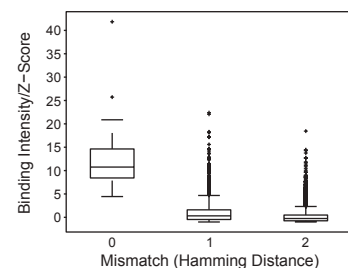

BATF2•JUN  
(<1 nM)

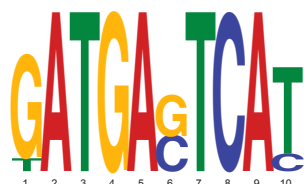

V

ATGAGTCAT

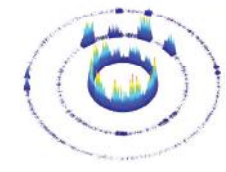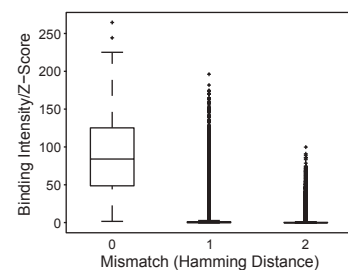

BATF2•JUN  
(<1 nM)

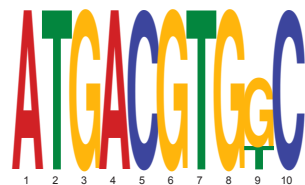

E

ATGACGTGGC

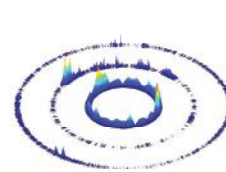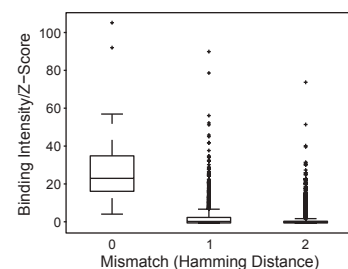

BATF3•ATF3  
(5 nM)

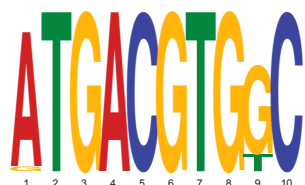

E

ATGACGTGGC

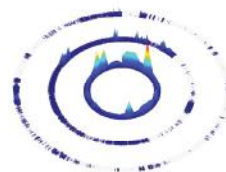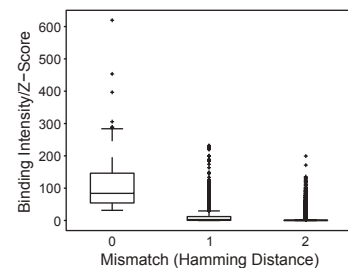

BATF3•ATF4  
(4 nM)

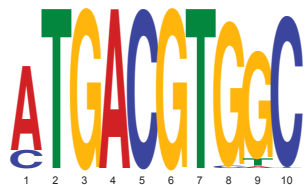

E

ATGACGTGGC

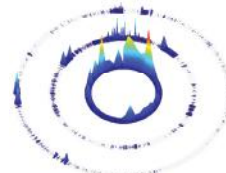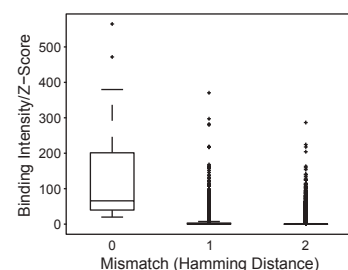

| Heterodimer<br>(PPI, Kd) | MEME motif and classification as<br>(i) conjoined half-sites (C),<br>(ii) conjoined half-site with a variable spacer (V), or as<br>(iii) emergent (E) based on homodimer specificity. | Sequence Specificity &<br>Energy Landscape (SEL)                                                   | Box plot for SEL rings                                                                |
|--------------------------|---------------------------------------------------------------------------------------------------------------------------------------------------------------------------------------|----------------------------------------------------------------------------------------------------|---------------------------------------------------------------------------------------|
| BATF3•CEBPA<br>(5 nM)    | 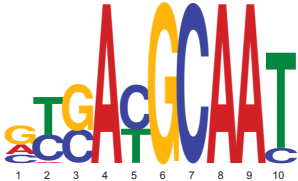 <div>C</div>                                                                                        | ATGACGCAAT<br>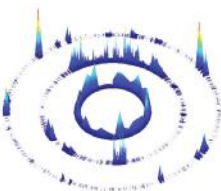   | 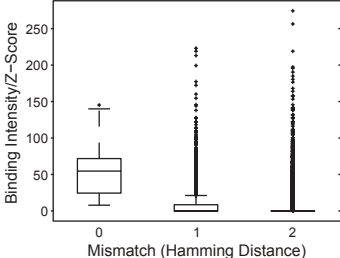   |
| BATF3•CEBPG<br>(2 nM)    | 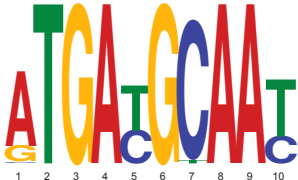 <div>C</div>                                                                                        | ATGACGCAAT<br>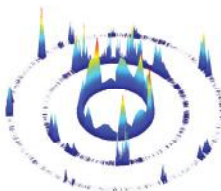   | 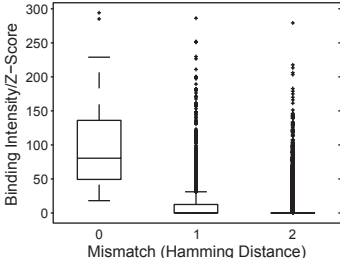   |
| BATF3•NFIL3<br>(150 nM)  | 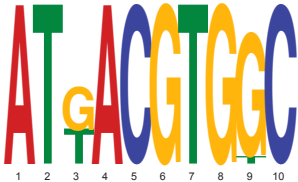 <div>E</div>                                                                                       | ATGACGTGGC<br>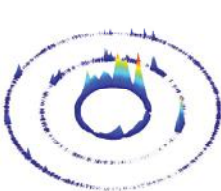  | 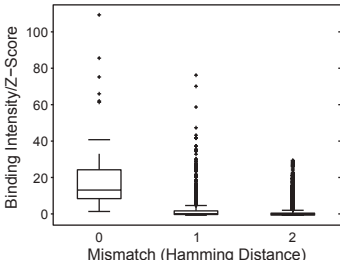  |
| DDIT3•CEBPG<br>(<1 nM)   | 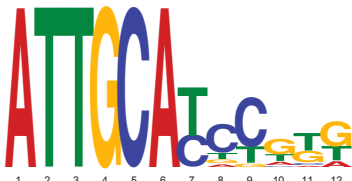 <div>E</div>                                                                                      | ATTGCA<br>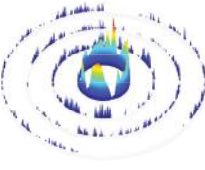     | 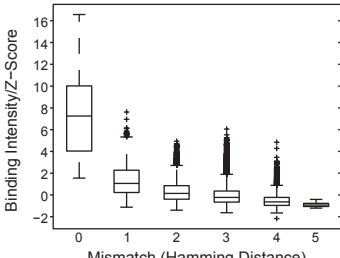 |
| FOS•ATF2<br>(5 nM)       | 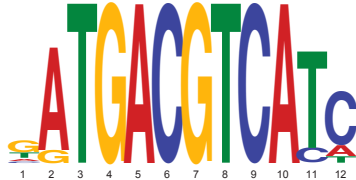 <div>C</div>                                                                                      | ATGACGTCAT<br>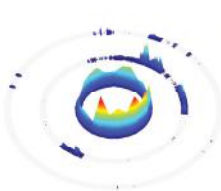 | 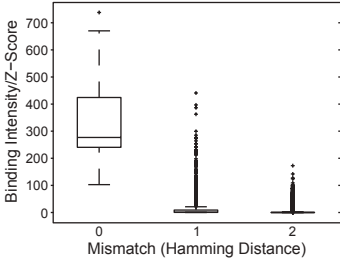 |
| FOS•ATF3<br>(185 nM)     | 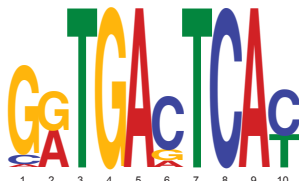 <div>V</div>                                                                                      | ATGAGTCAT<br>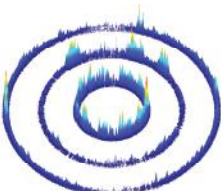  | 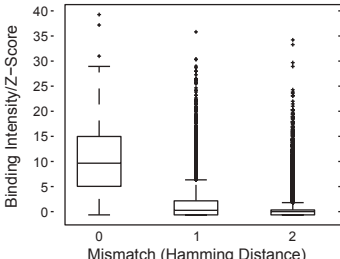 |

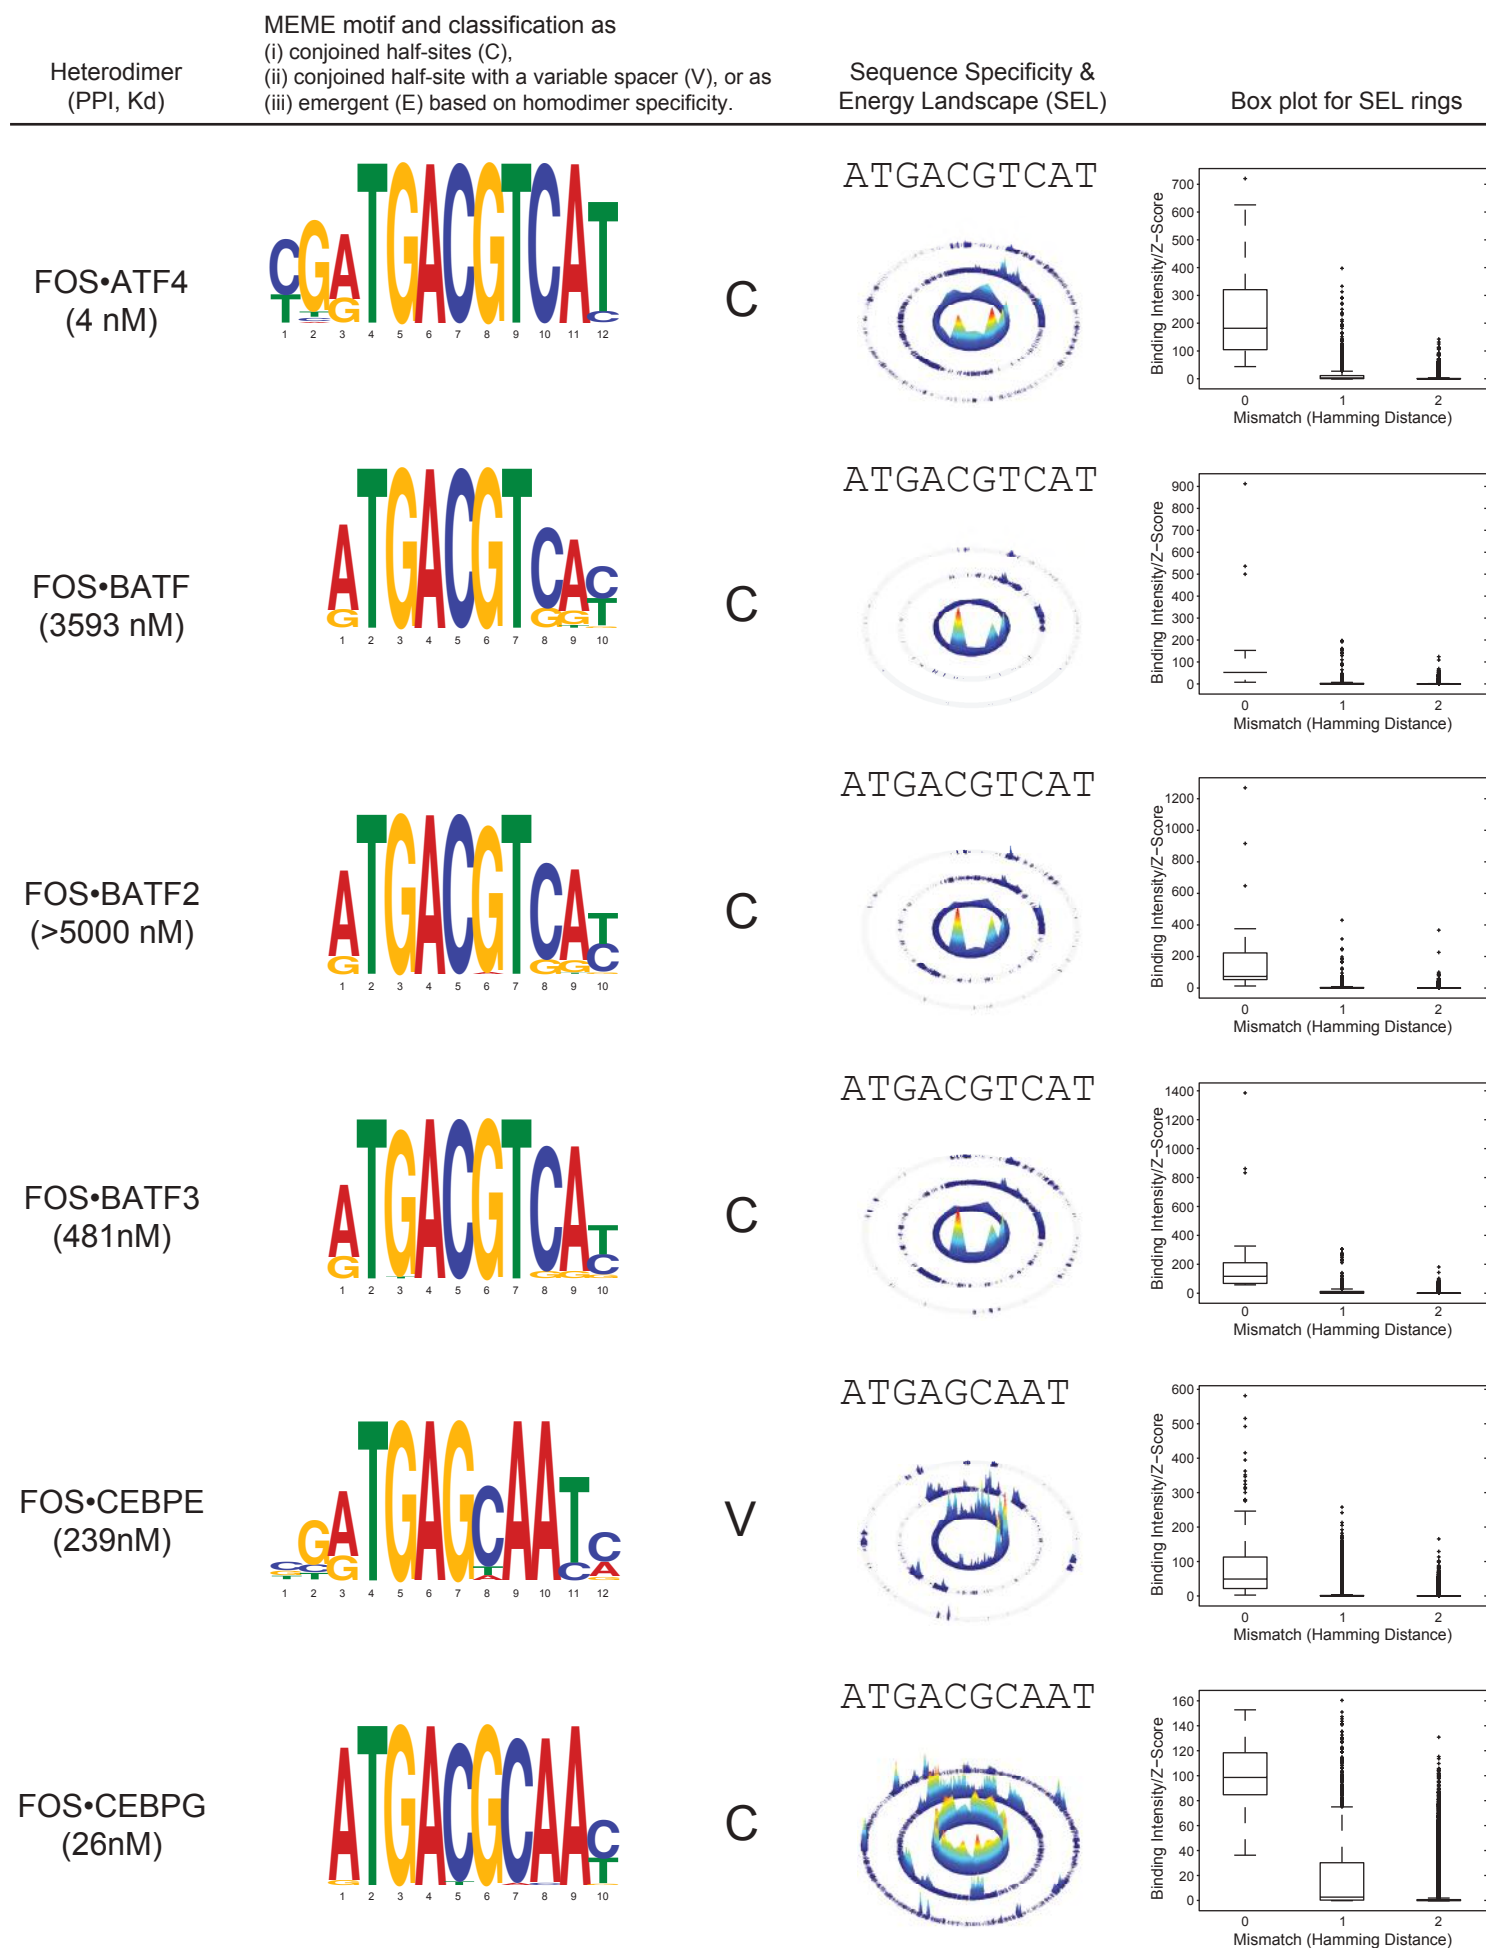

Heterodimer  
(PPI, Kd)

MEME motif and classification as  
(i) conjoined half-sites (C),  
(ii) conjoined half-site with a variable spacer (V), or as  
(iii) emergent (E) based on homodimer specificity.

Sequence Specificity &  
Energy Landscape (SEL)

Box plot for SEL rings

FOS•CREB3  
(>5000 nM)

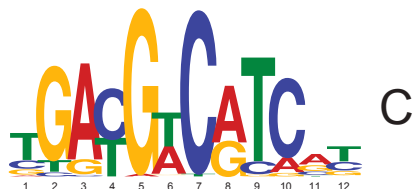

ATGACGTCAT

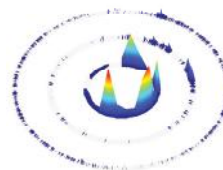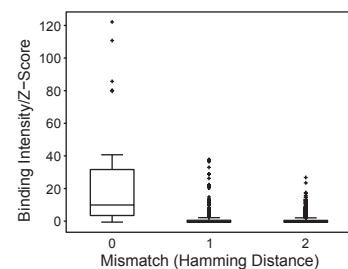

FOS•CREB3L3  
(>5000 nM)

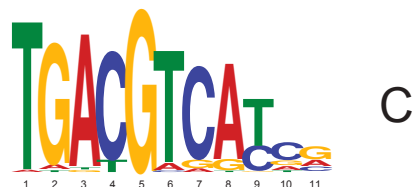

ATGACGTCAT

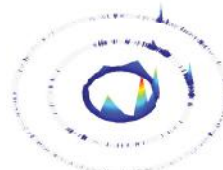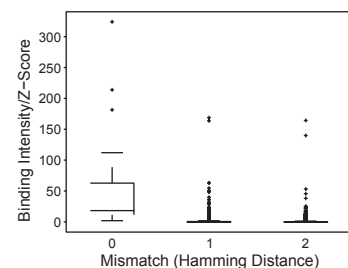

FOS•DBP  
(>5000 nM)

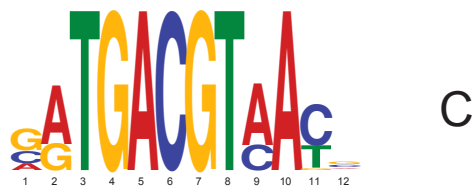

ATGACGTTAC

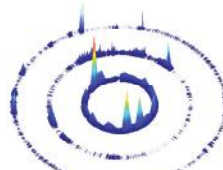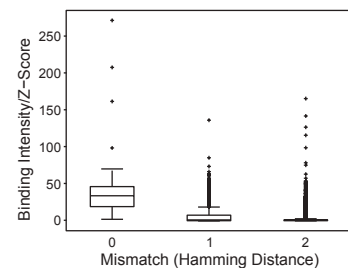

FOS•FOSL1  
(<1 nM)

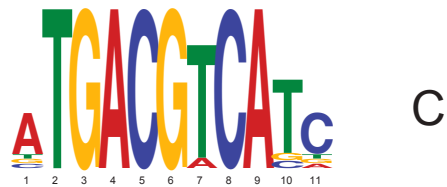

ATGAGTCAT

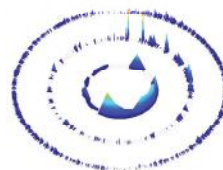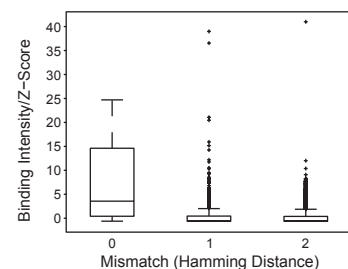

FOS•JUN  
(<1 nM)

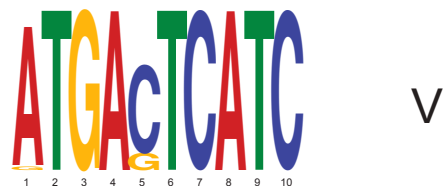

ATGAGTCAT

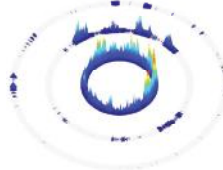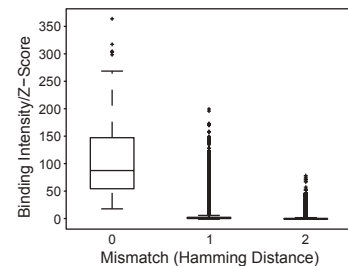

FOS•MAFB  
(63 nM)

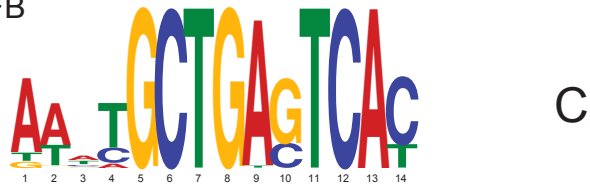

GCTGAGTCAT

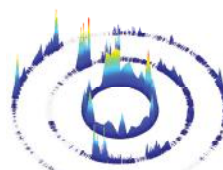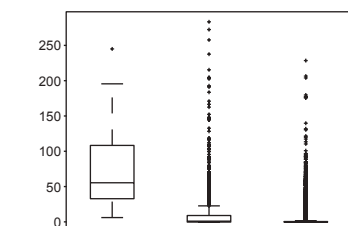

Heterodimer  
(PPI, Kd)

MEME motif and classification as  
(i) conjoined half-sites (C),  
(ii) conjoined half-site with a variable spacer (V), or as  
(iii) emergent (E) based on homodimer specificity.

Sequence Specificity &  
Energy Landscape (SEL)

Box plot for SEL rings

FOS•NFE2  
(>5000 nM)

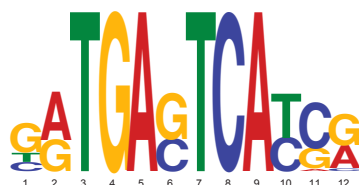

C

ATGAGTCAT

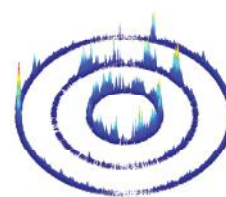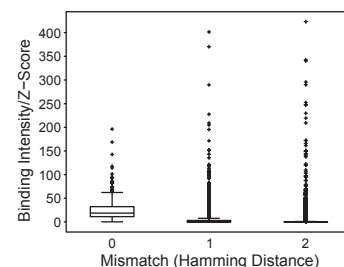

FOS•NFE2L1  
(>5000 nM)

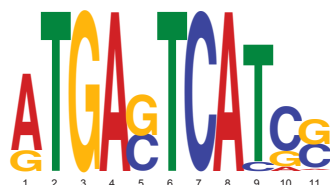

C

ATGAGTCAT

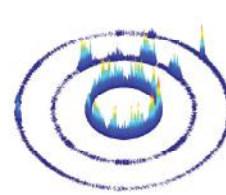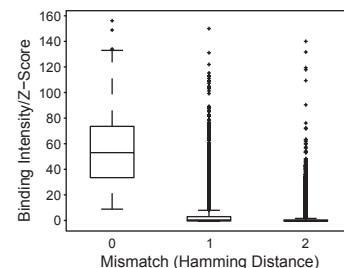

FOSL1•ATF3  
(233 nM)

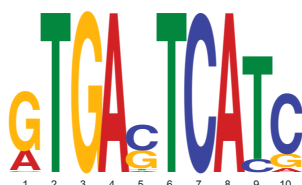

V

ATGAGTCAT

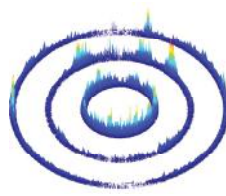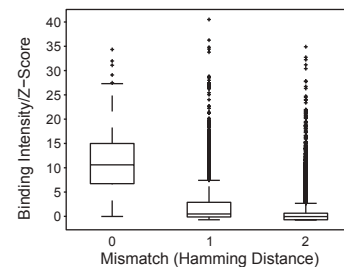

FOSL1•BATF3  
(481 nM)

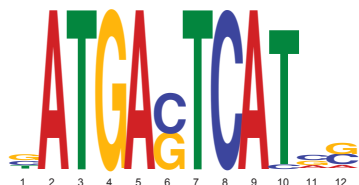

V

ATGAGTCAT

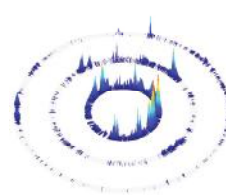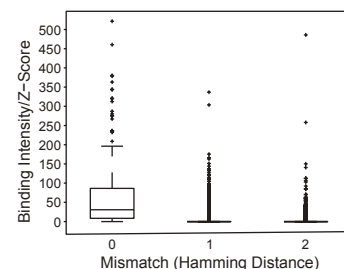

FOSL1•CEBPA  
(349 nM)

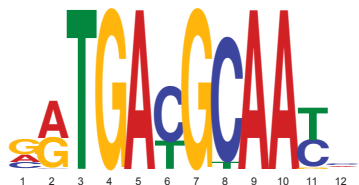

C

ATGACGCAAT

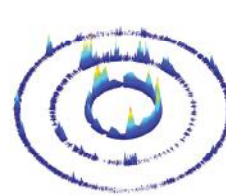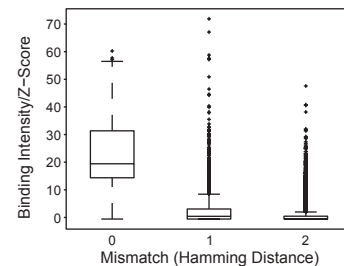

FOSL1•CEBPE  
(266 nM)

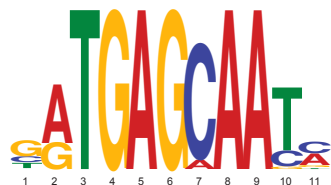

V

ATGAGCAAT

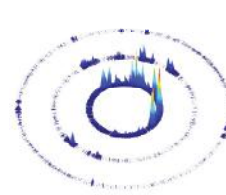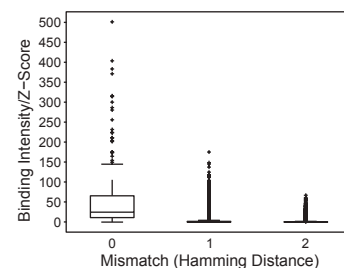

Heterodimer  
(PPI, Kd)

MEME motif and classification as  
(i) conjoined half-sites (C),  
(ii) conjoined half-site with a variable spacer (V), or as  
(iii) emergent (E) based on homodimer specificity.

Sequence Specificity &  
Energy Landscape (SEL)

Box plot for SEL rings

FOSL1•CEBPG  
(103 nM)

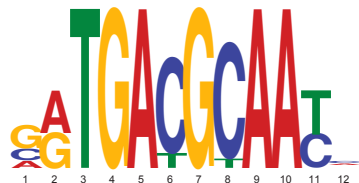

C

ATGACGCAAT

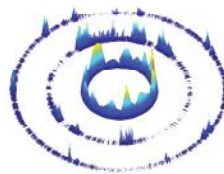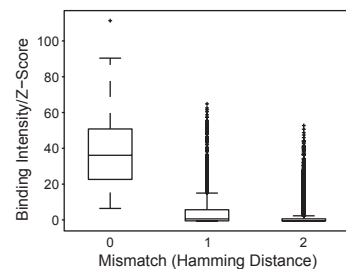

FOSL1•JUN  
(<1 nM)

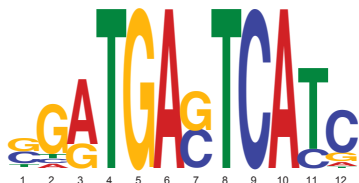

V

ATGAGTCAT

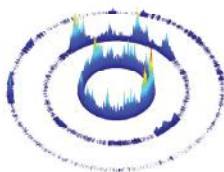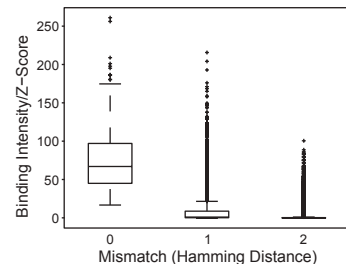

FOSL1•NFE2  
(>5000 nM)

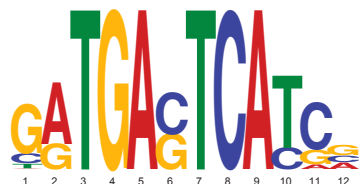

C

ATGAGTCAT

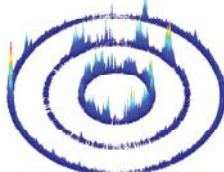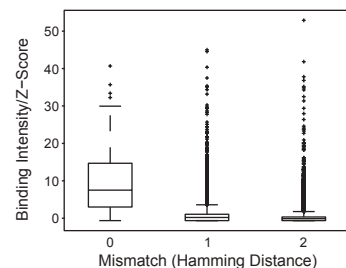

FOSL1•NFE2L1  
(>5000 nM)

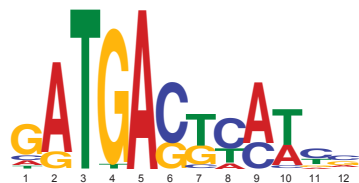

C

ATGAGTCAT

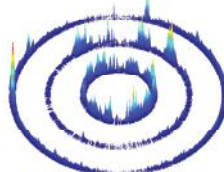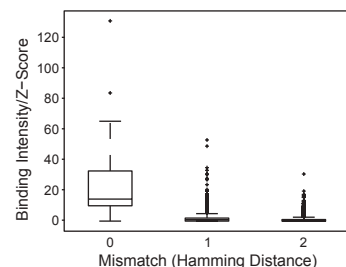

JUN•ATF3  
(5 nM)

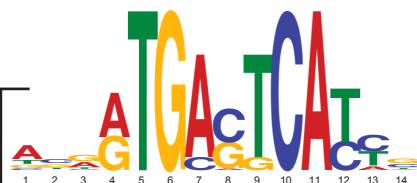

C

ATGAGTCAT

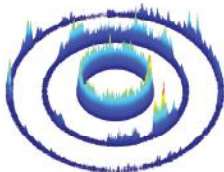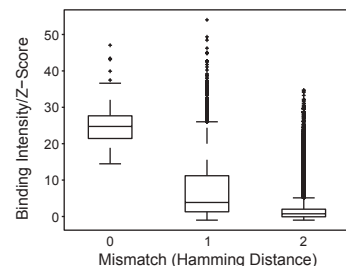

JUN•ATF3  
(5 nM)

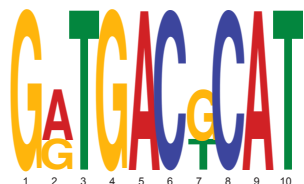

C

ATGACGCAT

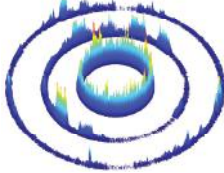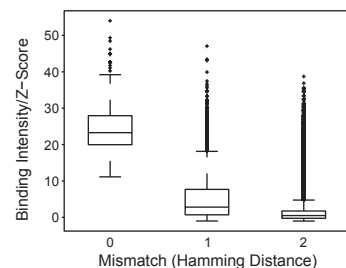

Heterodimer  
(PPI, Kd)

MEME motif and classification as  
(i) conjoined half-sites (C),  
(ii) conjoined half-site with a variable spacer (V), or as  
(iii) emergent (E) based on homodimer specificity.

Sequence Specificity &  
Energy Landscape (SEL)

Box plot for SEL rings

JUN•CEBPA  
(>5000 nM)

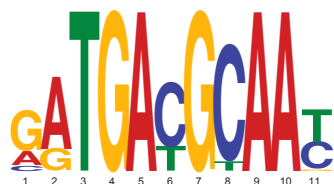

C

ATGACGCAAT

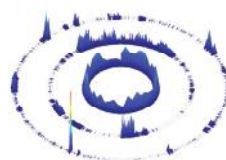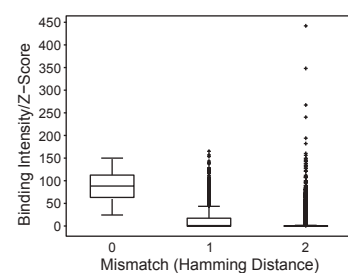

JUN•CEBPG  
(289 nM)

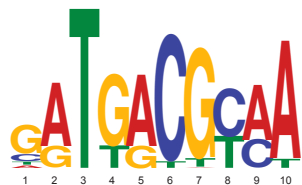

C

ATGACGCAAT

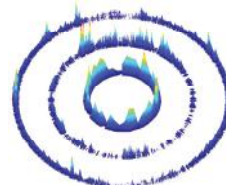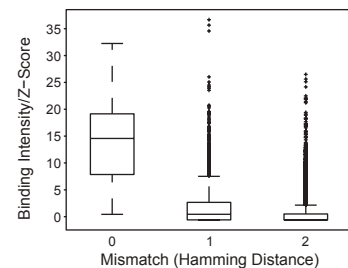

JUNB•ATF2  
(891nM)

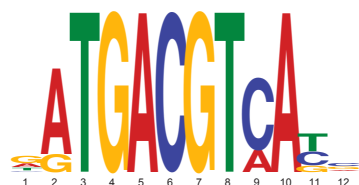

C

ATGACGTCAT

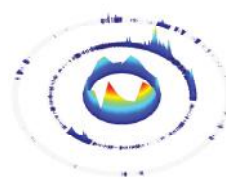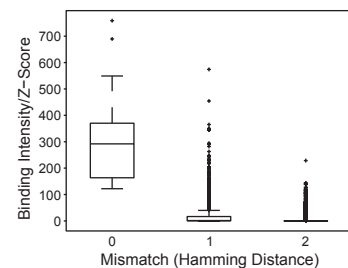

JUNB•ATF3  
(8nM)

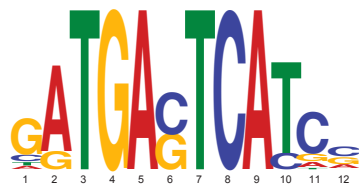

C

ATGAGTCAT

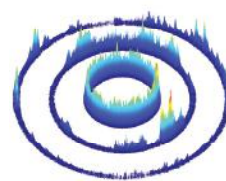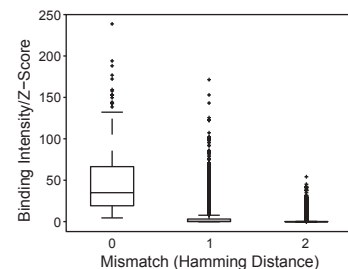

JUNB•ATF3  
(8nM)

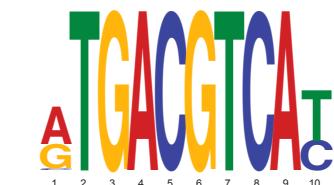

C

ATGACGTCAT

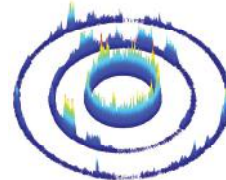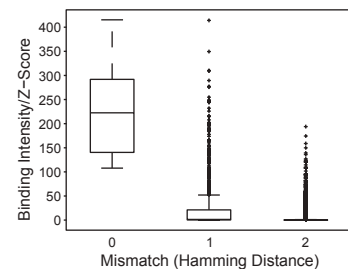

JUNB•ATF4  
(266 nM)

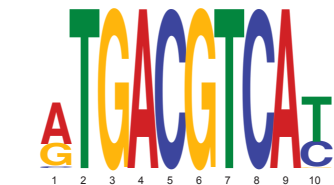

C

ATGACGTCAT

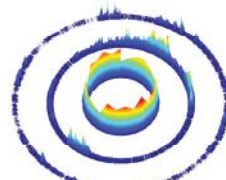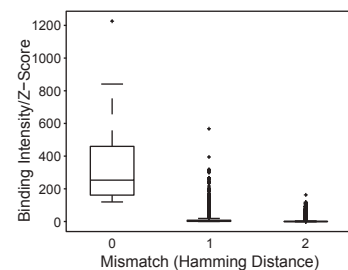

Heterodimer  
(PPI, Kd)

MEME motif and classification as  
(i) conjoined half-sites (C),  
(ii) conjoined half-site with a variable spacer (V), or as  
(iii) emergent (E) based on homodimer specificity.

Sequence Specificity &  
Energy Landscape (SEL)

Box plot for SEL rings

JUNB•BATF  
(<1 nM)

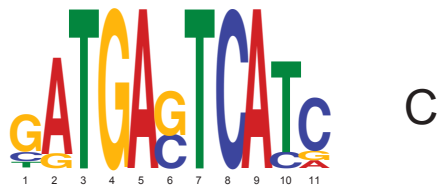

ATGAGTCAT

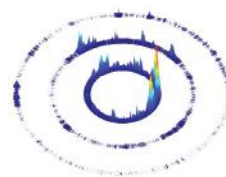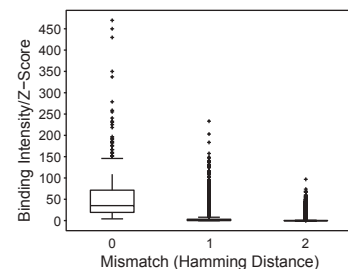

JUNB•BATF2  
(4 nM)

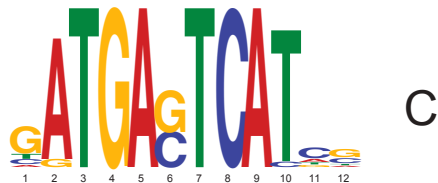

ATGAGTCAT

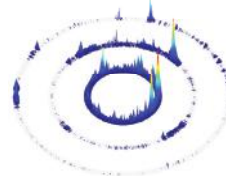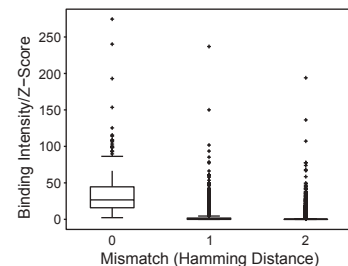

JUNB•BATF2  
(4 nM)

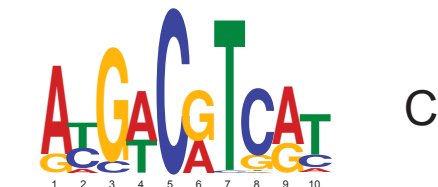

ATGACGTCAT

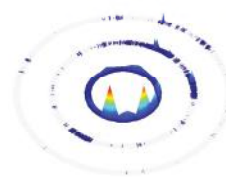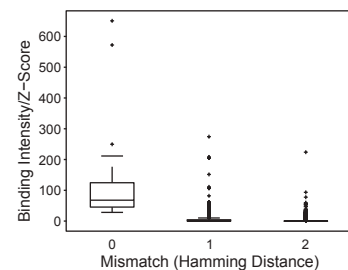

JUNB•BATF3  
(2 nM)

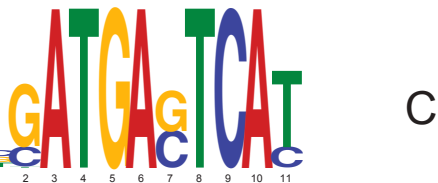

ATGAGTCAT

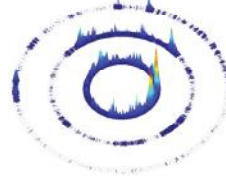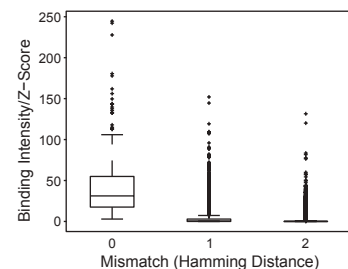

JUNB•BATF3  
(2 nM)

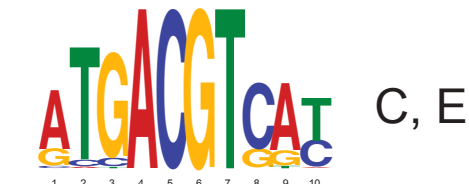

ATGACGTCAT

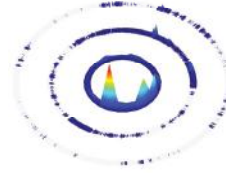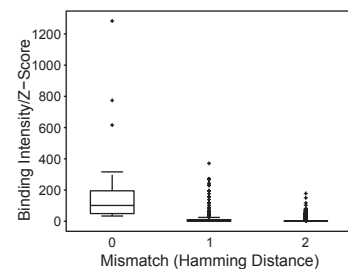

JUNB•CEBPA  
(>5000 nM)

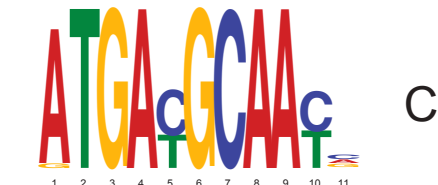

ATGACGCAAT

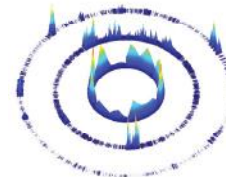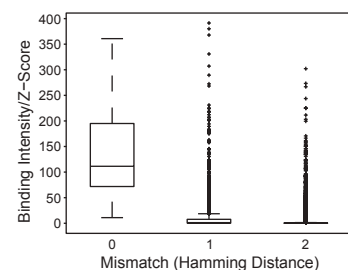

Heterodimer  
(PPI, Kd)

MEME motif and classification as  
(i) conjoined half-sites (C),  
(ii) conjoined half-site with a variable spacer (V), or as  
(iii) emergent (E) based on homodimer specificity.

Sequence Specificity &  
Energy Landscape (SEL)

Box plot for SEL rings

JUNB•CEBPE  
(1697 nM)

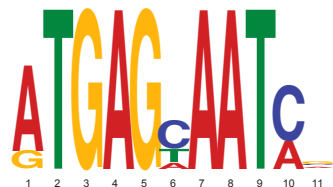

V

ATGACGCAAT

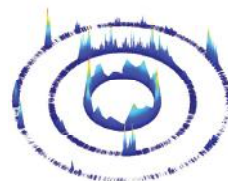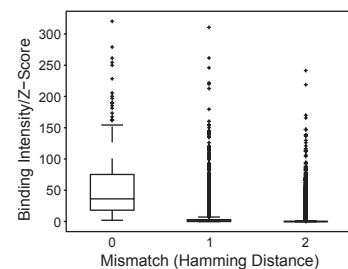

JUNB•CEBPG  
(>5000 nM)

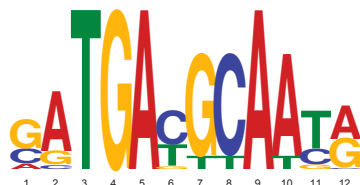

C

ATGACGCAAT

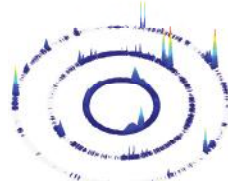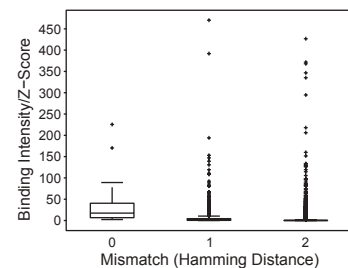

JUNB•CREBZF  
(>5000 nM)

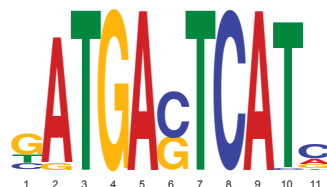

C

ATGAGTCAT

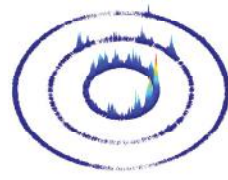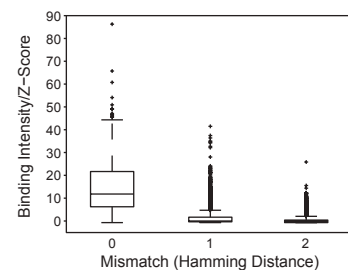

JUNB•DBP  
(>5000 nM)

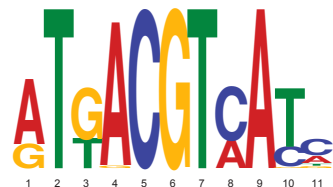

C

ATGACGTCAT

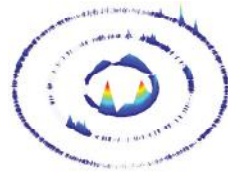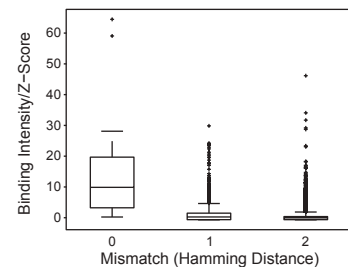

JUNB•FOS  
(2 nM)

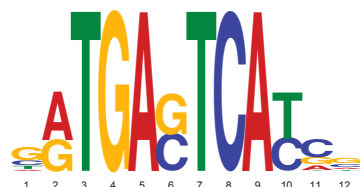

C

ATGAGTCAT

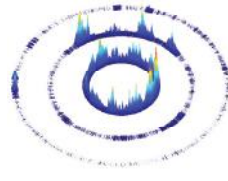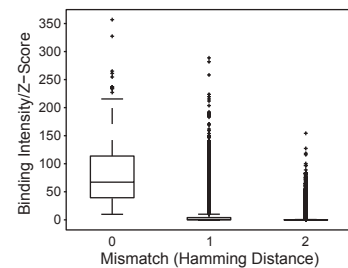

JUNB•FOSL1  
(5 nM)

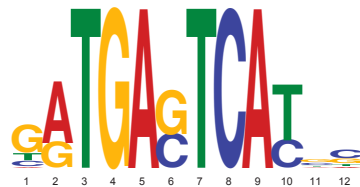

C

ATGAGTCAT

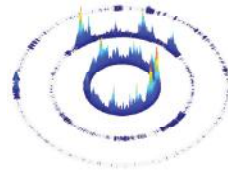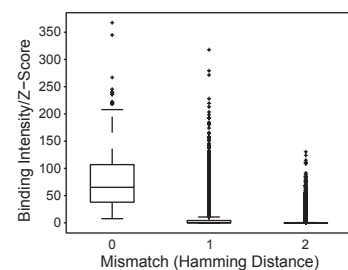

Heterodimer  
(PPI, Kd)

MEME motif and classification as  
(i) conjoined half-sites (C),  
(ii) conjoined half-site with a variable spacer (V), or as  
(iii) emergent (E) based on homodimer specificity.

Sequence Specificity &  
Energy Landscape (SEL)

Box plot for SEL rings

JUNB•HLF  
(>5000 nM)

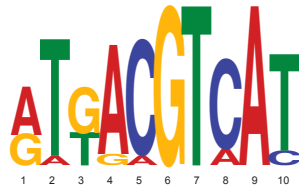

C

ATGACGTCAT

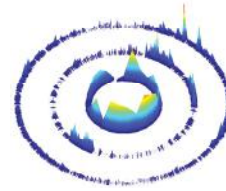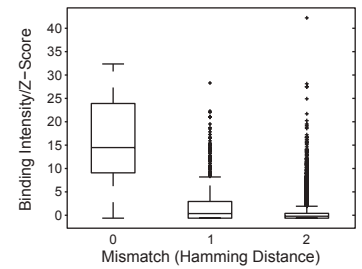

JUNB•JUN  
(>5000 nM)

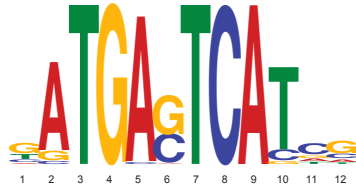

C

ATGAGTCAT

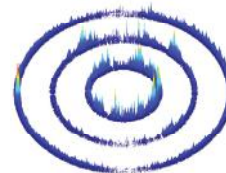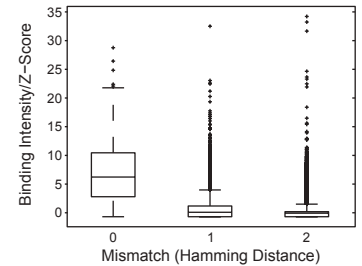

JUNB•JUN  
(>5000 nM)

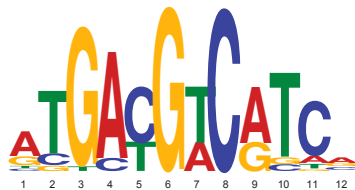

C

ATGACGTCAT

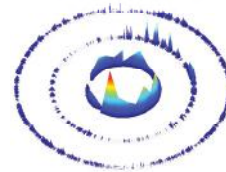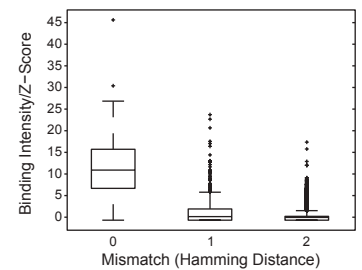

JUNB•NFE2  
(>5000 nM)

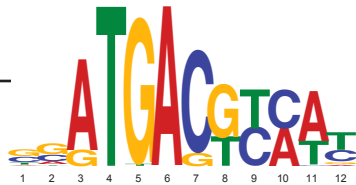

C

ATGACGTCAT

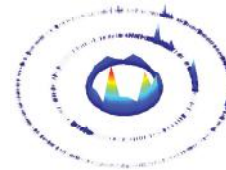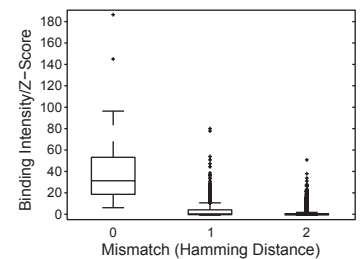

JUNB•NFE2  
(>5000 nM)

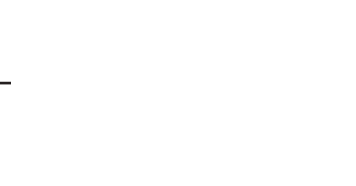

C

ATGAGTCAT

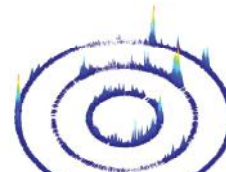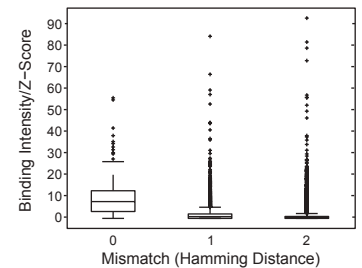

Heterodimer  
(PPI, Kd)

MEME motif and classification as  
(i) conjoined half-sites (C),  
(ii) conjoined half-site with a variable spacer (V), or as  
(iii) emergent (E) based on homodimer specificity.

Sequence Specificity &  
Energy Landscape (SEL)

Box plot for SEL rings

JUNB•NFE2L1  
(>5000 nM)

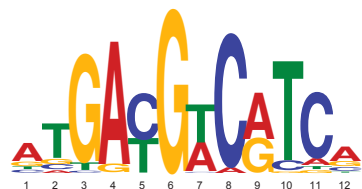

C

ATGACGTCAT

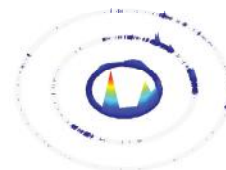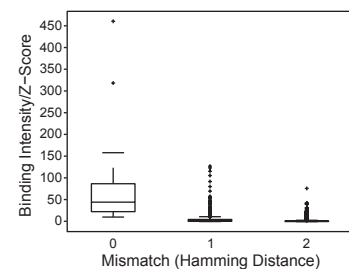

JUNB•NFE2L1  
(>5000 nM)

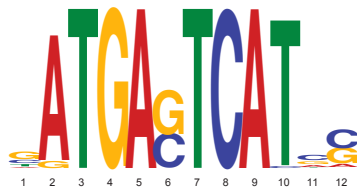

C

ATGAGTCAT

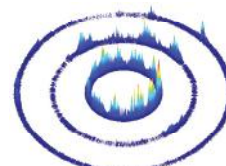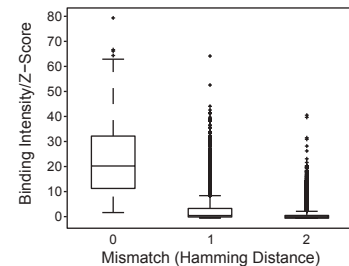

MAFB•ATF4  
(193 nM)

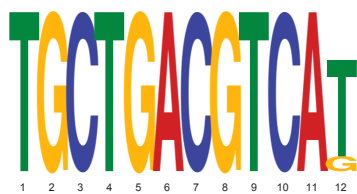

C

TGCTGACGTCAT

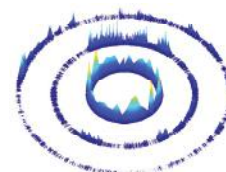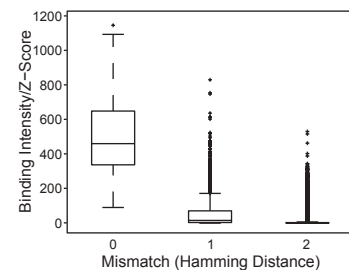

MAFB•ATF5  
(>5000 nM)

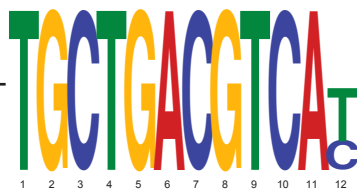

C

TGCTGACGTCAT

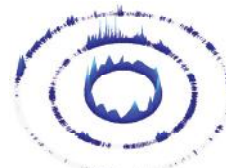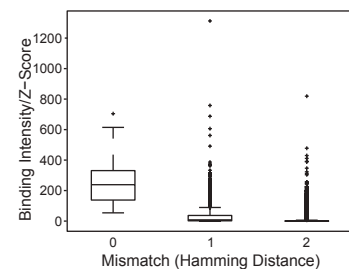

MAFB•ATF5  
(>5000 nM)

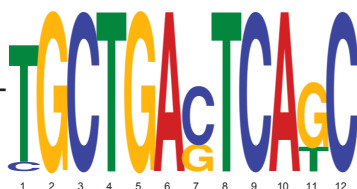

C

TGCTGAGTCAT

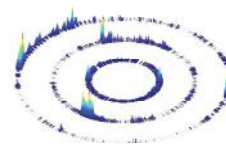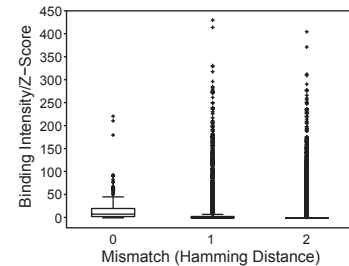

Heterodimer  
(PPI, Kd)

MEME motif and classification as  
(i) conjoined half-sites (C),  
(ii) conjoined half-site with a variable spacer (V), or as  
(iii) emergent (E) based on homodimer specificity.

Sequence Specificity &  
Energy Landscape (SEL)

Box plot for SEL rings

MAFB•FOSL1  
(152 nM)

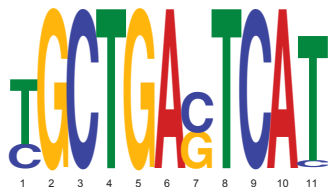

C

TGCTGAGTCAT

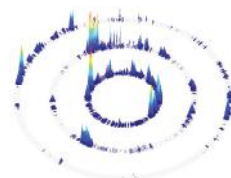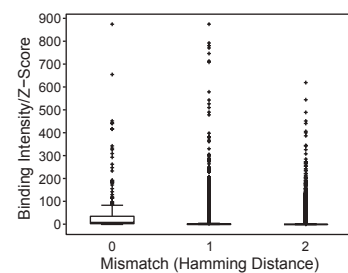

NFE2•MAFG  
(1340 nM)

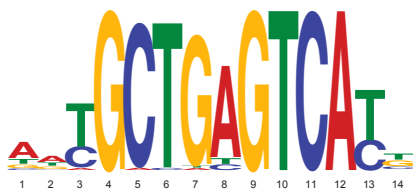

C

TGCTGAGTCAT

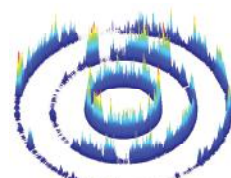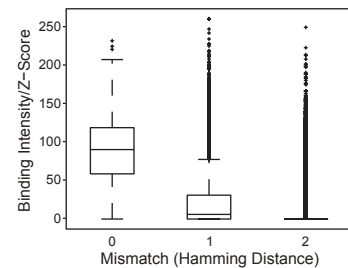

NFE2L1•MAFG  
(<1 nM)

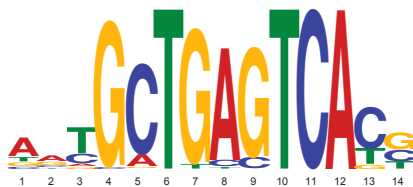

C

TGCTGAGTCAT

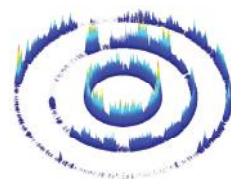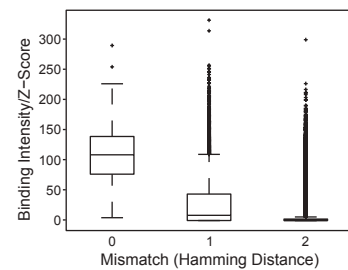

Supplement: supp [file elife-19272-supp-v1.zip › elife_poa_e19272_Supplementary_File_2.pdf]
