# Supplementary material for: Combinatorial bZIP dimers display complex DNA-binding specificity landscapes
Source: eLife journal article supplement (doi:10.7554/elife.19272), 2017-02-10
Supplement: supp [file elife-19272-supp-v1.zip]

Archive with 16 entries (16 files):
- elife_poa_e19272_Figure_1_source_data_1.xlsx
- elife_poa_e19272_Figure_1_figure_supplement_1.pdf
- elife_poa_e19272_Figure_3_figure_supplement_2.pdf
- elife_poa_e19272_Figure_1_figure_supplement_5.pdf
- elife_poa_e19272_Figure_1_figure_supplement_3.pdf
- elife_poa_e19272_Figure_1_figure_supplement_4.pdf
- elife_poa_e19272_Figure_2_source_data_1.xlsx
- elife_poa_e19272_Supplementary_File_1.xlsx
- elife_poa_e19272_Figure_7_figure_supplement_1.pdf
- elife_poa_e19272_Figure_3_figure_supplement_1.pdf
- elife_poa_e19272_SEL_12MER_14MER.zip
- elife_poa_e19272_Figure_5_figure_supplement_1.pdf
- elife_poa_e19272_SEL_10MER.zip
- elife_poa_e19272_Supplementary_File_2.pdf
- elife_poa_e19272_Figure_1_figure_supplement_2.pdf
- elife_poa_e19272_Figure_6_figure_supplement_1.pdf
