# Supplementary material for: Combinatorial bZIP dimers display complex DNA-binding specificity landscapes
Source: eLife journal article supplement (doi:10.7554/elife.19272), 2017-02-10

Figure 1-figure supplement 2

A

|   | Sequence                   | K <sub>a</sub> , 10 <sup>7</sup> M <sup>-1</sup> |
|---|----------------------------|--------------------------------------------------|
| a | gagtccaGATGACGTCATCtccgtag | 39.4 ± 3                                         |
| b | gagtccaGATTACGTCATCtccgtag | 17.6 ± 7                                         |
| c | gagtcccCATGACGTCATGgccgtag | 7.4 ± 0.1                                        |
| d | gagtcccCATTACGTCATGgccgtag | 7.4 ± 2                                          |
| e | gagtccaGATGACGTCAAAaccgtag | 5.5 ± 0.4                                        |
| f | gagtccaGACGACGTCATCtccgtag | 4.3 ± 2                                          |
| g | gagtcccCACGACGTCATGgccgtag | 3.6 ± 1                                          |
| h | gagtcctTTTGACGTCAAAaccgtag | 0.7 ± 0.1                                        |

B

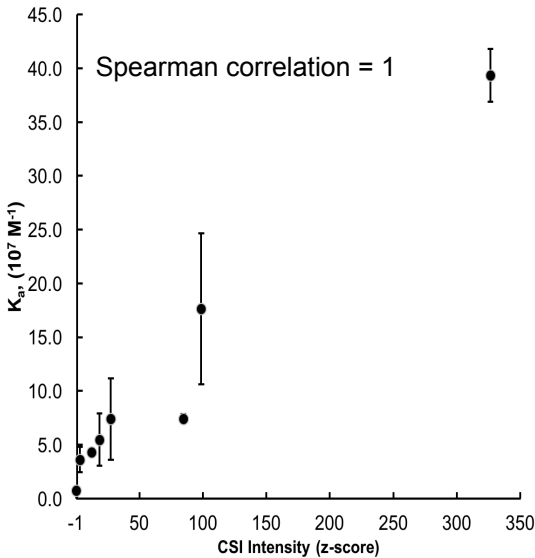

C

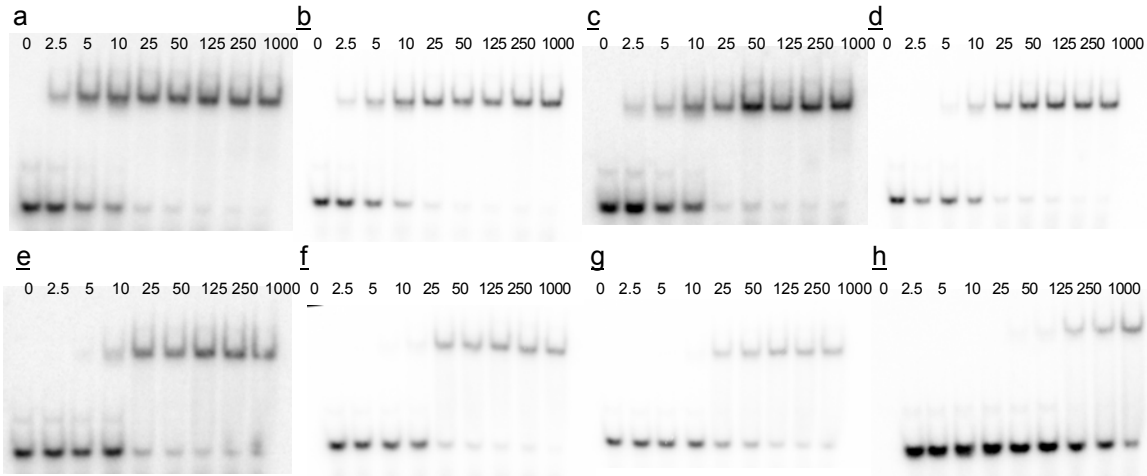

Supplement: supp [file elife-19272-supp-v1.zip › elife_poa_e19272_Figure_1_figure_supplement_2.pdf]
