# Supplementary material for: Combinatorial bZIP dimers display complex DNA-binding specificity landscapes
Source: eLife journal article supplement (doi:10.7554/elife.19272), 2017-02-10

Comparison between FOS•CEBPE and FOS•CEBPG heterodimers

FOS•CEBPE  
(239nM)

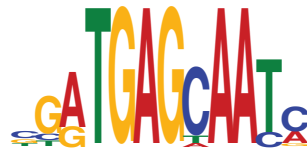

FOS•CEBPG  
(26nM)

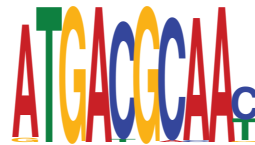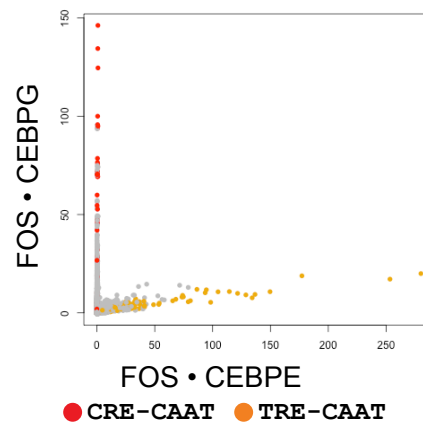

Comparison between FOSL1•CEBPE and FOSL1•CEBPG heterodimers

FOSL1•CEBPE  
(266 nM)

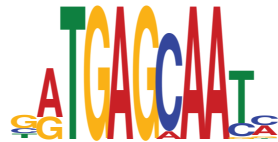

FOSL1•CEBPG  
(103 nM)

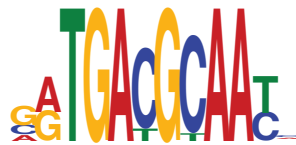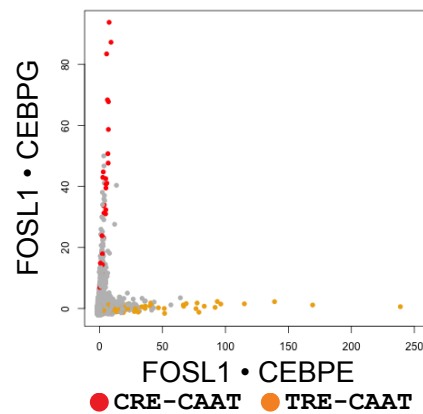

Supplement: supp [file elife-19272-supp-v1.zip › elife_poa_e19272_Figure_1_figure_supplement_5.pdf]
