# Supplementary material for: Combinatorial bZIP dimers display complex DNA-binding specificity landscapes
Source: eLife journal article supplement (doi:10.7554/elife.19272), 2017-02-10
Supplement: supp [file elife-19272-supp-v1.zip › elife_poa_e19272_Figure_1_source_data_1.xlsx]

## Sheet: Sheet1
PearsonCorrelation	ATF3:CEBPG	ATF4:CEBPA	ATF4:CEBPG	ATF5:CEBPG	ATF6B	BATF:CEBPG	BATF2:JUN	CEBPG	DDIT3:CEBPG	FOS:JUN	FOSL1:JUN	JUNB:BATF	NFE2L1:MAFG	BATF3:CEBPG	JUNB:BATF3	JUNB:FOS	BATF3:ATF4	CEBPE	HLF	FOS:ATF4	JUNB:BATF2	BATF3:ATF3	BATF3:CEBPA	FOS:ATF2	JUN:ATF3	JUNB:FOSL1	DBP	JUNB:ATF3	XBP1	BATF:CEBPA	CEBPA	CREB3L1	BATF2:ATF4	ATF3:CEBPA	CREB1	MAFG	BATF:ATF3	BATF:HLF	BATF:CEBPE	FOS:CEBPG	ATF6	NFE2L1	ATF5:CEBPE	ATF2	ATF5:CEBPA	MAFB	FOS:MAFB	NFIL3	CREB3
ATF3:CEBPG	1	0.763217	0.869335	0.824323	-0.0549534	0.634911	-0.0249521	0.245403	0.194602	-0.0299438	-0.0358987	-0.00657703	-0.114971	0.880543	0.0880273	-0.063875	0.028197	0.304777	0.358574	0.156886	0.00520266	-0.00398159	0.664018	0.183124	0.121029	-0.052696	0.22318	0.148024	-0.0301243	0.00737572	0.264263	-0.0468985	-0.0187995	0.783434	0.0975894	-0.0923341	-0.0311928	0.274151	-0.0263131	0.923945	0.036109	-0.0780976	0.546043	0.282209	0.794265	-0.0835606	-0.0223096	0.42049	0.0358937
ATF4:CEBPA	0.763217	1	0.94136	0.906388	-0.128631	0.700143	-0.1519	0.16835	0.32339	-0.0915233	-0.123275	-0.100731	-0.207349	0.759217	-0.00605869	-0.132062	-0.024516	0.283421	0.320942	0.114478	-0.101731	-0.0762586	0.720989	0.142708	-0.0103908	-0.123937	0.196653	0.0790027	-0.101726	0.138164	0.202119	-0.113229	-0.0495358	0.820283	0.0562443	-0.14095	-0.12634	0.275428	0.112377	0.815452	-0.0547103	-0.139157	0.824524	0.229017	0.908407	-0.126542	-0.108833	0.386252	-0.051097
ATF4:CEBPG	0.869335	0.94136	1	0.941419	-0.0965271	0.670078	-0.105162	0.186655	0.235413	-0.073727	-0.0965737	-0.0736585	-0.161581	0.851617	0.0168953	-0.107972	-0.00706396	0.2836	0.311274	0.111585	-0.0584858	-0.0597306	0.722165	0.139703	0.0272629	-0.100342	0.184305	0.079456	-0.0757797	0.0286944	0.218439	-0.0856468	-0.0365031	0.825741	0.0385679	-0.108313	-0.101429	0.26543	-0.00960121	0.895566	-0.0373207	-0.11465	0.808007	0.212863	0.943857	-0.0965099	-0.0682454	0.389432	-0.0425449
ATF5:CEBPG	0.824323	0.906388	0.941419	1	-0.0834162	0.638808	-0.0846533	0.114071	0.180914	-0.0665378	-0.0812681	-0.0499608	-0.154399	0.809223	0.0520393	-0.105166	0.0319645	0.230351	0.241346	0.163359	-0.0386769	-0.0258465	0.683199	0.184839	0.0478013	-0.0930922	0.109455	0.133147	-0.0606364	0.0168816	0.155549	-0.0766335	-0.0528413	0.868495	0.105336	-0.110864	-0.0738305	0.284589	-0.0177863	0.909526	0.000982116	-0.116178	0.865133	0.28604	0.990776	-0.0982557	-0.0583907	0.282135	0.0244668
ATF6B	-0.0549534	-0.128631	-0.0965271	-0.0834162	1	-0.0841692	0.39824	-0.0735659	-0.102348	-0.0379694	-0.0340163	0.279339	0.00359726	-0.0678375	0.163276	-0.0567819	0.554796	-0.090038	-0.0698921	0.111564	0.111262	0.717771	-0.0788595	0.0873868	-0.0484699	-0.048598	-0.0582189	0.0432096	0.736513	-0.0369562	-0.0801684	0.916365	0.291237	-0.0393919	0.113961	-0.0346371	0.640944	0.159193	-0.039406	-0.061049	0.7122	-0.0678422	-0.0787136	0.0798655	-0.0844647	-0.0470505	0.00726945	-0.0669387	0.583764
BATF:CEBPG	0.634911	0.700143	0.670078	0.638808	-0.0841692	1	-0.139358	0.125507	0.18676	-0.0946942	-0.122814	-0.114512	-0.165362	0.819253	-0.0712777	-0.114091	-0.0718724	0.189354	0.112506	-0.0187141	-0.112697	-0.0807177	0.955103	0.0152297	-0.0904108	-0.113851	0.031077	-0.0359126	-0.0766959	0.546004	0.135973	-0.0700335	-0.111334	0.525994	-0.0231376	-0.10376	-0.0949603	0.116203	0.51456	0.615103	-0.0590971	-0.112829	0.572303	0.0403672	0.644891	-0.0928192	-0.108708	0.129024	-0.0643838
BATF2:JUN	-0.0249521	-0.1519	-0.105162	-0.0846533	0.39824	-0.139358	1	-0.128428	-0.121703	0.29918	0.33414	0.61332	0.176931	-0.090797	0.546527	0.279735	0.551921	-0.151373	-0.0838369	0.313189	0.685701	0.739468	-0.131795	0.203027	0.349675	0.298128	-0.0673517	0.316448	0.580077	-0.0851754	-0.138556	0.365726	0.492674	0.0848638	0.167661	-0.0810117	0.688582	0.261906	-0.0923974	-0.0345613	0.387238	0.226388	-0.0948815	0.219758	-0.0898245	-0.0779337	0.0965808	-0.0445284	0.487292
CEBPG	0.245403	0.16835	0.186655	0.114071	-0.0735659	0.125507	-0.128428	1	0.0636708	-0.0683344	-0.0929335	-0.102596	-0.106822	0.192684	-0.0962896	-0.0755841	-0.0860901	0.969444	0.263498	-0.0705916	-0.102873	-0.095845	0.126878	-0.0429773	-0.113305	-0.0794076	0.138346	-0.077785	-0.0731068	-0.00200667	0.985672	-0.0628746	-0.107937	0.0499724	-0.0654803	-0.0707027	-0.120367	-0.0739537	-0.0165468	0.142953	-0.0832791	-0.0690251	0.0261036	-0.0568691	0.103544	-0.0591337	-0.0902151	0.226005	-0.102223
DDIT3:CEBPG	0.194602	0.32339	0.235413	0.180914	-0.102348	0.18676	-0.121703	0.0636708	1	0.00296465	-0.0413082	-0.00134967	-0.18474	0.185005	0.0865715	-0.0638174	0.010743	0.100549	0.100977	0.212246	-0.00617285	-0.0565715	0.163172	0.254309	-0.0853067	-0.0487653	0.0801306	0.18704	-0.0655338	-0.00501197	0.0670759	-0.088801	0.218823	0.206894	0.160458	-0.13114	-0.160723	0.131099	-0.0164376	0.180922	0.0216921	-0.0800908	0.149456	0.222543	0.174991	-0.11964	-0.0944904	0.241589	0.00754605
FOS:JUN	-0.0299438	-0.0915233	-0.073727	-0.0665378	-0.0379694	-0.0946942	0.29918	-0.0683344	0.00296465	1	0.943003	0.816868	0.277054	-0.0708216	0.690786	0.93653	0.045315	-0.084483	-0.073075	0.308999	0.508237	-0.0142384	-0.0861794	0.18948	0.684024	0.948747	-0.060756	0.60931	-0.014672	-0.043841	-0.075263	-0.0356261	0.0164829	0.151094	0.0956172	-0.0259182	0.018679	0.0176974	-0.0463867	-0.0206822	0.0447933	0.799628	-0.0623629	0.104583	-0.0658322	-0.0312427	0.17949	-0.0390346	0.0364544
FOSL1:JUN	-0.0358987	-0.123275	-0.0965737	-0.0812681	-0.0340163	-0.122814	0.33414	-0.0929335	-0.0413082	0.943003	1	0.806833	0.354613	-0.0882688	0.702788	0.972902	0.0669333	-0.114338	-0.0946723	0.322116	0.489119	0.018604	-0.112561	0.205813	0.804848	0.982223	-0.0795664	0.630749	-0.00339959	-0.0611368	-0.101841	-0.0327564	0.00630369	0.160386	0.138249	-0.0207209	0.0593169	0.0278081	-0.0648742	-0.0282812	0.0676248	0.881256	-0.0799124	0.140275	-0.0816855	-0.0253929	0.2426	-0.0582982	0.0790979
JUNB:BATF	-0.00657703	-0.100731	-0.0736585	-0.0499608	0.279339	-0.114512	0.61332	-0.102596	-0.00134967	0.816868	0.806833	1	0.322034	-0.0826983	0.897166	0.756831	0.454405	-0.117179	-0.076422	0.544382	0.681863	0.425246	-0.107527	0.414311	0.595042	0.787901	-0.070601	0.716295	0.347829	-0.0618503	-0.11003	0.25406	0.239188	0.211288	0.275537	0.000537804	0.404999	0.211073	-0.0654013	0.00841132	0.393578	0.583334	-0.0440349	0.319017	-0.054303	-0.00869672	0.266709	-0.0167012	0.375428
NFE2L1:MAFG	-0.114971	-0.207349	-0.161581	-0.154399	0.00359726	-0.165362	0.176931	-0.106822	-0.18474	0.277054	0.354613	0.322034	1	-0.122092	0.253402	0.337443	0.00466833	-0.139526	-0.146314	0.0349443	0.146837	0.0135557	-0.146157	-0.0415207	0.367742	0.341441	-0.112184	0.126775	0.00754892	-0.0711913	-0.118571	0.00531175	-0.0519448	-0.0866276	-0.0595955	0.180879	0.0909969	-0.101218	-0.0777343	-0.121661	-0.0226548	0.292888	-0.148249	-0.0892591	-0.148993	0.172793	0.666965	-0.147386	-0.0349061
BATF3:CEBPG	0.880543	0.759217	0.851617	0.809223	-0.0678375	0.819253	-0.090797	0.192684	0.185005	-0.0708216	-0.0882688	-0.0826983	-0.122092	1	-0.0365105	-0.0874001	-0.0504031	0.257252	0.181478	0.00264122	-0.0773188	-0.0630889	0.863972	0.02875	0.00668402	-0.0862614	0.0734269	-0.00912003	-0.0560404	0.093269	0.212679	-0.0546418	-0.0687019	0.688202	-0.0214841	-0.0823602	-0.0771323	0.142252	0.0492219	0.857278	-0.0378096	-0.0873749	0.62214	0.0741835	0.805435	-0.0736773	-0.0620974	0.212546	-0.0523233
JUNB:BATF3	0.0880273	-0.00605869	0.0168953	0.0520393	0.163276	-0.0712777	0.546527	-0.0962896	0.0865715	0.690786	0.702788	0.897166	0.253402	-0.0365105	1	0.601571	0.470477	-0.0958566	-0.0105836	0.803741	0.755858	0.354044	-0.0717728	0.702406	0.552393	0.650322	-0.0259778	0.878191	0.249512	-0.0611659	-0.0991944	0.120101	0.209474	0.341952	0.443698	-0.00627225	0.323006	0.341219	-0.0665744	0.111791	0.404359	0.458852	0.0473594	0.574151	0.0410497	-0.0124158	0.276872	0.0904719	0.413689
JUNB:FOS	-0.063875	-0.132062	-0.107972	-0.105166	-0.0567819	-0.114091	0.279735	-0.0755841	-0.0638174	0.93653	0.972902	0.756831	0.337443	-0.0874001	0.601571	1	-0.0243164	-0.0989429	-0.0952729	0.163862	0.420249	-0.0474546	-0.102596	0.0444637	0.717389	0.99646	-0.0736005	0.500525	-0.0445645	-0.04806	-0.0842983	-0.0495436	-0.0207031	0.0923544	0.00110641	-0.0206139	0.0159309	-0.0504157	-0.0506147	-0.0630612	-0.0258655	0.903209	-0.100002	-0.0103629	-0.101696	-0.0245609	0.191379	-0.0819621	-0.0331247
BATF3:ATF4	0.028197	-0.024516	-0.00706396	0.0319645	0.554796	-0.0718724	0.551921	-0.0860901	0.010743	0.045315	0.0669333	0.454405	0.00466833	-0.0504031	0.470477	-0.0243164	1	-0.0871435	-0.0281128	0.533378	0.322636	0.782167	-0.0713908	0.461806	0.0815372	0.00990509	-0.0390903	0.39125	0.661097	-0.0492333	-0.0888085	0.498614	0.576112	0.167803	0.388619	-0.047111	0.656112	0.339141	-0.0537776	0.041682	0.601545	-0.0682401	0.0577796	0.448249	0.0235945	-0.053942	0.0720971	0.0383595	0.621833
CEBPE	0.304777	0.283421	0.2836	0.230351	-0.090038	0.189354	-0.151373	0.969444	0.100549	-0.084483	-0.114338	-0.117179	-0.139526	0.257252	-0.0958566	-0.0989429	-0.0871435	1	0.303233	-0.0490355	-0.118238	-0.102534	0.197003	-0.0153662	-0.125772	-0.100896	0.174297	-0.0622041	-0.0860114	0.00831505	0.989869	-0.0782463	-0.122769	0.154838	-0.0448154	-0.0974575	-0.135115	-0.025015	-0.0083685	0.236654	-0.0826567	-0.0932716	0.133324	-0.0134917	0.218928	-0.0832657	-0.114038	0.262768	-0.0984665
HLF	0.358574	0.320942	0.311274	0.241346	-0.0698921	0.112506	-0.0838369	0.263498	0.100977	-0.073075	-0.0946723	-0.076422	-0.146314	0.181478	-0.0105836	-0.0952729	-0.0281128	0.303233	1	0.0489976	-0.0623847	-0.0397054	0.111445	0.0868341	0.00584568	-0.0911927	0.917568	0.0414355	-0.0617431	-0.0317818	0.279445	-0.0599894	0.0183904	0.22934	0.0270378	-0.0908491	-0.0544475	0.334953	-0.0470465	0.241707	-0.02092	-0.0969796	0.11448	0.21734	0.213849	-0.0830778	-0.084005	0.811777	-0.0285959
FOS:ATF4	0.156886	0.114478	0.111585	0.163359	0.111564	-0.0187141	0.313189	-0.0705916	0.212246	0.308999	0.322116	0.544382	0.0349443	0.00264122	0.803741	0.163862	0.533378	-0.0490355	0.0489976	1	0.564415	0.31595	-0.0278317	0.958532	0.277319	0.229192	0.0062264	0.891669	0.205414	-0.046793	-0.06777	0.077614	0.167896	0.442543	0.712794	-0.0439435	0.21327	0.456363	-0.0526867	0.206328	0.496492	0.0687289	0.162137	0.842889	0.145072	-0.0452392	0.181533	0.187646	0.529828
JUNB:BATF2	0.00520266	-0.101731	-0.0584858	-0.0386769	0.111262	-0.112697	0.685701	-0.102873	-0.00617285	0.508237	0.489119	0.681863	0.146837	-0.0773188	0.755858	0.420249	0.322636	-0.118238	-0.0623847	0.564415	1	0.275673	-0.106639	0.477327	0.363961	0.454931	-0.0574103	0.594517	0.210807	-0.0659692	-0.110082	0.0925735	0.171114	0.162257	0.268553	-0.0635592	0.271699	0.264065	-0.071183	0.0192939	0.264185	0.308747	-0.0394461	0.360641	-0.0433941	-0.0606117	0.122979	0.00416167	0.267494
BATF3:ATF3	-0.00398159	-0.0762586	-0.0597306	-0.0258465	0.717771	-0.0807177	0.739468	-0.095845	-0.0565715	-0.0142384	0.018604	0.425246	0.0135557	-0.0630889	0.354044	-0.0474546	0.782167	-0.102534	-0.0397054	0.31595	0.275673	1	-0.0829532	0.250501	0.0836442	-0.025765	-0.0429374	0.224198	0.793109	-0.0529713	-0.100281	0.667983	0.540743	0.114906	0.323058	-0.059486	0.843904	0.34819	-0.0570025	-0.0064566	0.66688	-0.0773128	-0.0189326	0.337592	-0.0340977	-0.0618554	0.0458994	-0.00581269	0.753777
BATF3:CEBPA	0.664018	0.720989	0.722165	0.683199	-0.0788595	0.955103	-0.131795	0.126878	0.163172	-0.0861794	-0.112561	-0.107527	-0.146157	0.863972	-0.0717728	-0.102596	-0.0713908	0.197003	0.111445	-0.0278317	-0.106639	-0.0829532	1	0.00436741	-0.074914	-0.103115	0.0301373	-0.0426963	-0.0696557	0.517931	0.143363	-0.0638068	-0.100303	0.571902	-0.0408737	-0.0927204	-0.0998271	0.102292	0.477091	0.673026	-0.0569588	-0.0999742	0.616157	0.0215549	0.699605	-0.0823564	-0.0962494	0.132202	-0.0724439
FOS:ATF2	0.183124	0.142708	0.139703	0.184839	0.0873868	0.0152297	0.203027	-0.0429773	0.254309	0.18948	0.205813	0.414311	-0.0415207	0.02875	0.702406	0.0444637	0.461806	-0.0153662	0.0868341	0.958532	0.477327	0.250501	0.00436741	1	0.155495	0.110242	0.0407977	0.849096	0.158274	-0.0287297	-0.0369229	0.0548525	0.128095	0.42879	0.719875	-0.0376456	0.131014	0.453615	-0.0334522	0.228552	0.469531	-0.0358693	0.171647	0.857796	0.166058	-0.0376588	0.138894	0.232906	0.501063
JUN:ATF3	0.121029	-0.0103908	0.0272629	0.0478013	-0.0484699	-0.0904108	0.349675	-0.113305	-0.0853067	0.684024	0.804848	0.595042	0.367742	0.00668402	0.552393	0.717389	0.0815372	-0.125772	0.00584568	0.277319	0.363961	0.0836442	-0.074914	0.155495	1	0.727261	0.00829565	0.493772	0.0276357	-0.111901	-0.118379	-0.0347836	0.0550394	0.280434	0.131769	-0.0392901	0.155954	0.135901	-0.122913	0.111957	0.0714446	0.693369	0.000611835	0.20716	0.0379728	-0.0404283	0.255125	0.0641291	0.0889067
JUNB:FOSL1	-0.052696	-0.123937	-0.100342	-0.0930922	-0.048598	-0.113851	0.298128	-0.0794076	-0.0487653	0.948747	0.982223	0.787901	0.341441	-0.0862614	0.650322	0.99646	0.00990509	-0.100896	-0.0911927	0.229192	0.454931	-0.025765	-0.103115	0.110242	0.727261	1	-0.0728617	0.559181	-0.0311823	-0.0504387	-0.087823	-0.0442252	-0.0113415	0.121458	0.0535755	-0.021771	0.0285429	-0.0185843	-0.0533581	-0.0481744	0.00991949	0.886794	-0.0884943	0.0492332	-0.0909701	-0.0260931	0.204419	-0.0697892	0.0093028
DBP	0.22318	0.196653	0.184305	0.109455	-0.0582189	0.031077	-0.0673517	0.138346	0.0801306	-0.060756	-0.0795664	-0.070601	-0.112184	0.0734269	-0.0259778	-0.0736005	-0.0390903	0.174297	0.917568	0.0062264	-0.0574103	-0.0429374	0.0301373	0.0407977	0.00829565	-0.0728617	1	0.00785358	-0.0532037	-0.0322055	0.159513	-0.0495533	0.0383607	0.100278	-0.0181216	-0.0666082	-0.0533052	0.264677	-0.0416695	0.107312	-0.0376835	-0.0724383	0.0287764	0.149398	0.0912818	-0.0613951	-0.0704521	0.838363	-0.0525872
JUNB:ATF3	0.148024	0.0790027	0.079456	0.133147	0.0432096	-0.0359126	0.316448	-0.077785	0.18704	0.60931	0.630749	0.716295	0.126775	-0.00912003	0.878191	0.500525	0.39125	-0.0622041	0.0414355	0.891669	0.594517	0.224198	-0.0426963	0.849096	0.493772	0.559181	0.00785358	1	0.10045	-0.0528533	-0.0759454	0.015227	0.0956254	0.459902	0.671553	-0.0460042	0.130035	0.400782	-0.0589801	0.180485	0.393956	0.366079	0.120848	0.795653	0.115945	-0.04826	0.217282	0.165743	0.48077
XBP1	-0.0301243	-0.101726	-0.0757797	-0.0606364	0.736513	-0.0766959	0.580077	-0.0731068	-0.0655338	-0.014672	-0.00339959	0.347829	0.00754892	-0.0560404	0.249512	-0.0445645	0.661097	-0.0860114	-0.0617431	0.205414	0.210807	0.793109	-0.0696557	0.158274	0.0276357	-0.0311823	-0.0532037	0.10045	1	-0.0401016	-0.0786914	0.794917	0.473	0.0153373	0.132256	-0.0233195	0.683677	0.241283	-0.0432485	-0.0343908	0.67689	-0.0642881	-0.0539503	0.13676	-0.063939	-0.040655	0.0251032	-0.0417201	0.545381
BATF:CEBPA	0.00737572	0.138164	0.0286944	0.0168816	-0.0369562	0.546004	-0.0851754	-0.00200667	-0.00501197	-0.043841	-0.0611368	-0.0618503	-0.0711913	0.093269	-0.0611659	-0.04806	-0.0492333	0.00831505	-0.0317818	-0.046793	-0.0659692	-0.0529713	0.517931	-0.0287297	-0.111901	-0.0504387	-0.0322055	-0.0528533	-0.0401016	1	-0.00817795	-0.0310001	-0.0775779	0.00862548	-0.0397917	-0.0447351	-0.0540238	-0.0626793	0.983995	-0.000706622	-0.0457178	-0.0441361	0.0535693	-0.0547025	0.0246441	-0.0370747	-0.0667377	-0.0414727	-0.0492969
CEBPA	0.264263	0.202119	0.218439	0.155549	-0.0801684	0.135973	-0.138556	0.985672	0.0670759	-0.075263	-0.101841	-0.11003	-0.118571	0.212679	-0.0991944	-0.0842983	-0.0888085	0.989869	0.279445	-0.06777	-0.110082	-0.100281	0.143363	-0.0369229	-0.118379	-0.087823	0.159513	-0.0759454	-0.0786914	-0.00817795	1	-0.068676	-0.115461	0.0838656	-0.0634531	-0.0795151	-0.12998	-0.0556877	-0.0235812	0.178659	-0.0858616	-0.0776497	0.0603317	-0.0434714	0.144821	-0.0669833	-0.099	0.240139	-0.105463
CREB3L1	-0.0468985	-0.113229	-0.0856468	-0.0766335	0.916365	-0.0700335	0.365726	-0.0628746	-0.088801	-0.0356261	-0.0327564	0.25406	0.00531175	-0.0546418	0.120101	-0.0495436	0.498614	-0.0782463	-0.0599894	0.077614	0.0925735	0.667983	-0.0638068	0.0548525	-0.0347836	-0.0442252	-0.0495533	0.015227	0.794917	-0.0310001	-0.068676	1	0.264398	-0.0367042	0.075654	-0.012468	0.595404	0.161111	-0.0332733	-0.0536398	0.722434	-0.057632	-0.0742612	0.0465261	-0.0778095	-0.0325796	0.0151567	-0.0609744	0.535689
BATF2:ATF4	-0.0187995	-0.0495358	-0.0365031	-0.0528413	0.291237	-0.111334	0.492674	-0.107937	0.218823	0.0164829	0.00630369	0.239188	-0.0519448	-0.0687019	0.209474	-0.0207031	0.576112	-0.122769	0.0183904	0.167896	0.171114	0.540743	-0.100303	0.128095	0.0550394	-0.0113415	0.0383607	0.0956254	0.473	-0.0775779	-0.115461	0.264398	1	-0.000957583	0.0813053	-0.0900928	0.410065	0.169525	-0.0844754	-0.0397389	0.24491	-0.0306463	-0.0555494	0.126675	-0.0563298	-0.0878102	-0.0553855	0.139357	0.279467
ATF3:CEBPA	0.783434	0.820283	0.825741	0.868495	-0.0393919	0.525994	0.0848638	0.0499724	0.206894	0.151094	0.160386	0.211288	-0.0866276	0.688202	0.341952	0.0923544	0.167803	0.154838	0.22934	0.442543	0.162257	0.114906	0.571902	0.42879	0.280434	0.121458	0.100278	0.459902	0.0153373	0.00862548	0.0838656	-0.0367042	-0.000957583	1	0.366252	-0.132333	0.0408004	0.391326	-0.00906894	0.885901	0.167957	0.0381384	0.71902	0.553682	0.853893	-0.122074	0.0195019	0.313224	0.230073
CREB1	0.0975894	0.0562443	0.0385679	0.105336	0.113961	-0.0231376	0.167661	-0.0654803	0.160458	0.0956172	0.138249	0.275537	-0.0595955	-0.0214841	0.443698	0.00110641	0.388619	-0.0448154	0.0270378	0.712794	0.268553	0.323058	-0.0408737	0.719875	0.131769	0.0535755	-0.0181216	0.671553	0.132256	-0.0397917	-0.0634531	0.075654	0.0813053	0.366252	1	-0.0537791	0.146277	0.391066	-0.0459282	0.146848	0.520431	-0.0572572	0.0919031	0.792617	0.0868355	-0.0486797	0.0779928	0.113147	0.687152
MAFG	-0.0923341	-0.14095	-0.108313	-0.110864	-0.0346371	-0.10376	-0.0810117	-0.0707027	-0.13114	-0.0259182	-0.0207209	0.000537804	0.180879	-0.0823602	-0.00627225	-0.0206139	-0.047111	-0.0974575	-0.0908491	-0.0439435	-0.0635592	-0.059486	-0.0927204	-0.0376456	-0.0392901	-0.021771	-0.0666082	-0.0460042	-0.0233195	-0.0447351	-0.0795151	-0.012468	-0.0900928	-0.132333	-0.0537791	1	-0.0574432	-0.0779002	-0.0490882	-0.103906	-0.0397248	-0.0429316	-0.0998865	-0.0765332	-0.106434	0.974127	0.434524	-0.0990434	-0.0683777
BATF:ATF3	-0.0311928	-0.12634	-0.101429	-0.0738305	0.640944	-0.0949603	0.688582	-0.120367	-0.160723	0.018679	0.0593169	0.404999	0.0909969	-0.0771323	0.323006	0.0159309	0.656112	-0.135115	-0.0544475	0.21327	0.271699	0.843904	-0.0998271	0.131014	0.155954	0.0285429	-0.0533052	0.130035	0.683677	-0.0540238	-0.12998	0.595404	0.410065	0.0408004	0.146277	-0.0574432	1	0.273899	-0.0543243	-0.0391884	0.535507	0.00012985	-0.0789982	0.181106	-0.0821735	-0.0626863	0.0099195	-0.0507957	0.581992
BATF:HLF	0.274151	0.275428	0.26543	0.284589	0.159193	0.116203	0.261906	-0.0739537	0.131099	0.0176974	0.0278081	0.211073	-0.101218	0.142252	0.341219	-0.0504157	0.339141	-0.025015	0.334953	0.456363	0.264065	0.34819	0.102292	0.453615	0.135901	-0.0185843	0.264677	0.400782	0.241283	-0.0626793	-0.0556877	0.161111	0.169525	0.391326	0.391066	-0.0779002	0.273899	1	-0.0739161	0.259972	0.37036	-0.0858684	0.260933	0.588276	0.264519	-0.0733227	0.00726786	0.390816	0.387192
BATF:CEBPE	-0.0263131	0.112377	-0.00960121	-0.0177863	-0.039406	0.51456	-0.0923974	-0.0165468	-0.0164376	-0.0463867	-0.0648742	-0.0654013	-0.0777343	0.0492219	-0.0665744	-0.0506147	-0.0537776	-0.0083685	-0.0470465	-0.0526867	-0.071183	-0.0570025	0.477091	-0.0334522	-0.122913	-0.0533581	-0.0416695	-0.0589801	-0.0432485	0.983995	-0.0235812	-0.0332733	-0.0844754	-0.00906894	-0.0459282	-0.0490882	-0.0543243	-0.0739161	1	-0.022512	-0.0513759	-0.0470242	0.0244254	-0.0648816	-0.0102783	-0.0411472	-0.0751691	-0.0573964	-0.0555261
FOS:CEBPG	0.923945	0.815452	0.895566	0.909526	-0.061049	0.615103	-0.0345613	0.142953	0.180922	-0.0206822	-0.0282812	0.00841132	-0.121661	0.857278	0.111791	-0.0630612	0.041682	0.236654	0.241707	0.206328	0.0192939	-0.0064566	0.673026	0.228552	0.111957	-0.0481744	0.107312	0.180485	-0.0343908	-0.000706622	0.178659	-0.0536398	-0.0397389	0.885901	0.146848	-0.103906	-0.0391884	0.259972	-0.022512	1	0.0523218	-0.0820385	0.66098	0.3038	0.887887	-0.0933739	-0.0335994	0.298481	0.0571918
ATF6	0.036109	-0.0547103	-0.0373207	0.000982116	0.7122	-0.0590971	0.387238	-0.0832791	0.0216921	0.0447933	0.0676248	0.393578	-0.0226548	-0.0378096	0.404359	-0.0258655	0.601545	-0.0826567	-0.02092	0.496492	0.264185	0.66688	-0.0569588	0.469531	0.0714446	0.00991949	-0.0376835	0.393956	0.67689	-0.0457178	-0.0858616	0.722434	0.24491	0.167957	0.520431	-0.0397248	0.535507	0.37036	-0.0513759	0.0523218	1	-0.0697763	-0.00545338	0.455352	-0.0107792	-0.0514469	0.0651171	0.0224673	0.767505
NFE2L1	-0.0780976	-0.139157	-0.11465	-0.116178	-0.0678422	-0.112829	0.226388	-0.0690251	-0.0800908	0.799628	0.881256	0.583334	0.292888	-0.0873749	0.458852	0.903209	-0.0682401	-0.0932716	-0.0969796	0.0687289	0.308747	-0.0773128	-0.0999742	-0.0358693	0.693369	0.886794	-0.0724383	0.366079	-0.0642881	-0.0441361	-0.0776497	-0.057632	-0.0306463	0.0381384	-0.0572572	-0.0429316	0.00012985	-0.0858684	-0.0470242	-0.0820385	-0.0697763	1	-0.110354	-0.0791521	-0.111211	-0.0426878	0.104637	-0.0932189	-0.0800811
ATF5:CEBPE	0.546043	0.824524	0.808007	0.865133	-0.0787136	0.572303	-0.0948815	0.0261036	0.149456	-0.0623629	-0.0799124	-0.0440349	-0.148249	0.62214	0.0473594	-0.100002	0.0577796	0.133324	0.11448	0.162137	-0.0394461	-0.0189326	0.616157	0.171647	0.000611835	-0.0884943	0.0287764	0.120848	-0.0539503	0.0535693	0.0603317	-0.0742612	-0.0555494	0.71902	0.0919031	-0.0998865	-0.0789982	0.260933	0.0244254	0.66098	-0.00545338	-0.110354	1	0.23728	0.910349	-0.088204	-0.0645752	0.157885	0.0202968
ATF2	0.282209	0.229017	0.212863	0.28604	0.0798655	0.0403672	0.219758	-0.0568691	0.222543	0.104583	0.140275	0.319017	-0.0892591	0.0741835	0.574151	-0.0103629	0.448249	-0.0134917	0.21734	0.842889	0.360641	0.337592	0.0215549	0.857796	0.20716	0.0492332	0.149398	0.795653	0.13676	-0.0547025	-0.0434714	0.0465261	0.126675	0.553682	0.792617	-0.0765332	0.181106	0.588276	-0.0648816	0.3038	0.455352	-0.0791521	0.23728	1	0.255305	-0.0716805	0.114443	0.332904	0.593143
ATF5:CEBPA	0.794265	0.908407	0.943857	0.990776	-0.0844647	0.644891	-0.0898245	0.103544	0.174991	-0.0658322	-0.0816855	-0.054303	-0.148993	0.805435	0.0410497	-0.101696	0.0235945	0.218928	0.213849	0.145072	-0.0433941	-0.0340977	0.699605	0.166058	0.0379728	-0.0909701	0.0912818	0.115945	-0.063939	0.0246441	0.144821	-0.0778095	-0.0563298	0.853893	0.0868355	-0.106434	-0.0821735	0.264519	-0.0102783	0.887887	-0.0107792	-0.111211	0.910349	0.255305	1	-0.0935909	-0.0600592	0.255838	0.00826272
MAFB	-0.0835606	-0.126542	-0.0965099	-0.0982557	-0.0470505	-0.0928192	-0.0779337	-0.0591337	-0.11964	-0.0312427	-0.0253929	-0.00869672	0.172793	-0.0736773	-0.0124158	-0.0245609	-0.053942	-0.0832657	-0.0830778	-0.0452392	-0.0606117	-0.0618554	-0.0823564	-0.0376588	-0.0404283	-0.0260931	-0.0613951	-0.04826	-0.040655	-0.0370747	-0.0669833	-0.0325796	-0.0878102	-0.122074	-0.0486797	0.974127	-0.0626863	-0.0733227	-0.0411472	-0.0933739	-0.0514469	-0.0426878	-0.088204	-0.0716805	-0.0935909	1	0.430973	-0.0912214	-0.0683473
FOS:MAFB	-0.0223096	-0.108833	-0.0682454	-0.0583907	0.00726945	-0.108708	0.0965808	-0.0902151	-0.0944904	0.17949	0.2426	0.266709	0.666965	-0.0620974	0.276872	0.191379	0.0720971	-0.114038	-0.084005	0.181533	0.122979	0.0458994	-0.0962494	0.138894	0.255125	0.204419	-0.0704521	0.217282	0.0251032	-0.0667377	-0.099	0.0151567	-0.0553855	0.0195019	0.0779928	0.434524	0.0099195	0.00726786	-0.0751691	-0.0335994	0.0651171	0.104637	-0.0645752	0.114443	-0.0600592	0.430973	1	-0.058846	0.0442383
NFIL3	0.42049	0.386252	0.389432	0.282135	-0.0669387	0.129024	-0.0445284	0.226005	0.241589	-0.0390346	-0.0582982	-0.0167012	-0.147386	0.212546	0.0904719	-0.0819621	0.0383595	0.262768	0.811777	0.187646	0.00416167	-0.00581269	0.132202	0.232906	0.0641291	-0.0697892	0.838363	0.165743	-0.0417201	-0.0414727	0.240139	-0.0609744	0.139357	0.313224	0.113147	-0.0990434	-0.0507957	0.390816	-0.0573964	0.298481	0.0224673	-0.0932189	0.157885	0.332904	0.255838	-0.0912214	-0.058846	1	0.00983666
CREB3	0.0358937	-0.051097	-0.0425449	0.0244668	0.583764	-0.0643838	0.487292	-0.102223	0.00754605	0.0364544	0.0790979	0.375428	-0.0349061	-0.0523233	0.413689	-0.0331247	0.621833	-0.0984665	-0.0285959	0.529828	0.267494	0.753777	-0.0724439	0.501063	0.0889067	0.0093028	-0.0525872	0.48077	0.545381	-0.0492969	-0.105463	0.535689	0.279467	0.230073	0.687152	-0.0683777	0.581992	0.387192	-0.0555261	0.0571918	0.767505	-0.0800811	0.0202968	0.593143	0.00826272	-0.0683473	0.0442383	0.00983666	1
FOSL1:CEBPG	0.945997	0.726789	0.831262	0.836285	-0.0382795	0.662373	-0.00307355	0.186826	0.159143	-0.00851503	-0.0127053	0.0286129	-0.0967122	0.897322	0.120782	-0.0446095	0.0521372	0.258057	0.222652	0.182762	0.0356261	0.010924	0.687132	0.202982	0.109613	-0.0310703	0.09077	0.162224	-0.0112439	0.0173425	0.213938	-0.0375563	-0.0387716	0.781836	0.115559	-0.0977688	-0.00642099	0.232587	-0.0149411	0.941358	0.0535054	-0.0629087	0.559792	0.263205	0.806765	-0.0887642	-0.0183578	0.261884	0.0583985
BATF3	0.12276	0.0692292	0.0687715	0.113192	0.249577	-0.00473865	0.261142	-0.0519391	0.175676	0.159199	0.172322	0.452307	-0.0264191	0.0114176	0.669208	0.0330895	0.529426	-0.0345975	0.0283344	0.839501	0.447867	0.369742	-0.00667595	0.813879	0.139056	0.0911371	-0.0052049	0.697558	0.358968	-0.0307212	-0.04989	0.244015	0.157378	0.325185	0.622649	-0.020553	0.24597	0.430262	-0.0354133	0.157557	0.715751	-0.0413694	0.114801	0.684298	0.0978291	-0.0278843	0.130906	0.125009	0.586029
BATF3:NFIL3	0.154426	0.145811	0.147367	0.154197	0.304787	0.150877	0.25974	-0.0672104	0.00110968	-0.0350986	-0.0333302	0.174753	-0.0785841	0.133855	0.211037	-0.0704279	0.384132	-0.0477758	0.17475	0.228384	0.110806	0.445004	0.13122	0.216232	0.0371739	-0.0549035	0.140234	0.17419	0.342245	-0.0118751	-0.0588613	0.285817	0.238198	0.191955	0.178126	-0.0541985	0.371387	0.683322	-0.0213826	0.126084	0.339359	-0.0884526	0.156616	0.319583	0.142392	-0.0625896	0.0112606	0.230781	0.322049
MAFB:FOSL1	-0.0672048	-0.118689	-0.0906504	-0.0741139	0.0429104	-0.110777	0.00787738	-0.0987445	-0.108483	0.0334951	0.062074	0.136826	0.262162	-0.0867491	0.172033	0.0260936	0.139613	-0.123516	-0.103059	0.17027	0.0467672	0.0946895	-0.100521	0.124836	0.0689249	0.0384793	-0.085134	0.147997	0.106251	-0.0614676	-0.107994	0.076313	-0.0440474	-0.0148626	0.102961	0.69244	0.0206626	0.0686342	-0.0694645	-0.0762719	0.162452	-0.0284339	-0.0398007	0.135936	-0.0731557	0.630467	0.608386	-0.0893007	0.111933
FOS:ATF3	-0.0596617	-0.159483	-0.125344	-0.113182	-0.0191158	-0.132181	0.38744	-0.100857	-0.156022	0.70479	0.810694	0.627227	0.39835	-0.0868952	0.548441	0.800004	0.0214239	-0.126794	-0.133822	0.173582	0.42336	0.0503424	-0.118761	0.0234214	0.763652	0.797306	-0.111812	0.393085	0.0142188	-0.0737342	-0.112478	-0.0159082	-0.0212196	0.0942747	0.0152924	-0.0264486	0.210931	-0.0111886	-0.0769822	-0.0535793	0.0103466	0.791676	-0.117062	-0.000816319	-0.111089	-0.029716	0.206038	-0.123252	0.0230212
ATF5:BATF	0.0637446	0.0243814	0.0371636	0.0750395	0.397413	-0.0469082	0.496262	-0.0651122	0.0738708	0.0845071	0.10268	0.471849	0.0124476	-0.0258248	0.526077	-0.00268852	0.849801	-0.0590125	-0.000161413	0.609516	0.38258	0.647807	-0.0464219	0.568035	0.100908	0.0376162	-0.0194518	0.470406	0.539949	-0.0397121	-0.0655218	0.356192	0.454514	0.21254	0.388347	-0.0513158	0.528106	0.339978	-0.0438074	0.0859375	0.494833	-0.0543941	0.0977677	0.493986	0.0658777	-0.050238	0.0776902	0.0823709	0.549911
MAFB:ATF4	-0.00970397	-0.0240872	-0.0160898	0.0160721	0.0327624	-0.0880611	0.0597724	-0.0896579	-0.0294121	0.0462295	0.0834701	0.17827	0.120091	-0.0660789	0.251719	0.0239298	0.257867	-0.0993626	-0.0607246	0.291253	0.0871134	0.169036	-0.0835912	0.232804	0.127833	0.0427432	-0.0603706	0.274387	0.0862028	-0.0576187	-0.0942505	0.036243	0.0149448	0.115307	0.178966	0.382793	0.0554883	0.134605	-0.0652124	-0.0105306	0.154913	-0.0248011	0.0603626	0.319705	0.0133697	0.347464	0.487078	-0.0212899	0.169437
ATF3	0.22111	0.172057	0.153713	0.22675	0.0851095	0.0155238	0.248187	-0.0654476	0.220828	0.240256	0.281385	0.446329	-0.0212182	0.0384507	0.696294	0.126121	0.456794	-0.0325595	0.11981	0.905073	0.443366	0.321601	-0.000612944	0.897956	0.270883	0.189429	0.0625601	0.892732	0.141624	-0.0483856	-0.0575531	0.0480422	0.115445	0.528968	0.82016	-0.0564689	0.164355	0.523025	-0.0562624	0.250913	0.476541	0.037653	0.201124	0.949225	0.201698	-0.0543201	0.152467	0.240809	0.61972
FOSL1:ATF3	-0.0587113	-0.160445	-0.12972	-0.113344	-0.00663159	-0.14988	0.3821	-0.124619	-0.0959039	0.62185	0.722069	0.580478	0.412377	-0.101478	0.518694	0.703669	0.0430569	-0.151215	-0.133666	0.190634	0.393848	0.079357	-0.137712	0.0500949	0.722512	0.704792	-0.110554	0.37185	0.0416267	-0.0826737	-0.136129	0.00264709	0.0546549	0.0916517	0.0265867	-0.0622051	0.215992	0.0147927	-0.0852676	-0.0519957	0.0365634	0.694868	-0.116697	0.0440949	-0.112395	-0.0629113	0.164999	-0.0964192	0.0415949
FOS:CEBPE	-0.0722005	-0.0345234	-0.0883178	-0.0921132	-0.0553739	-0.0653603	-0.0752283	-0.0490714	-0.0172576	0.0117907	-0.00397919	-0.0183806	-0.0595159	-0.0670174	-0.0359873	0.00700833	-0.0645315	-0.0576875	-0.0790463	-0.0422276	-0.0395194	-0.0733034	-0.0692258	-0.0350041	-0.0428855	0.00466711	-0.0585192	-0.0297853	-0.0548413	-0.0200987	-0.0543976	-0.0469456	-0.0819317	0.0395323	-0.0494504	-0.044385	-0.0647583	-0.0862166	0.0809208	0.0283049	-0.0635663	-0.00548202	-0.0740016	-0.0704409	-0.086579	-0.0429605	-0.0660315	-0.0786537	-0.0762715
FOSL1:CEBPE	-0.0283624	0.00512374	-0.0521339	-0.0514756	-0.0539961	-0.00601572	-0.0220474	-0.0489657	-0.00664335	0.108509	0.0942715	0.0786069	-0.0239916	-0.028027	0.0599777	0.101188	-0.0429682	-0.053187	-0.0780273	0.0144781	0.0366838	-0.0550041	-0.012142	0.00383063	0.0424012	0.101597	-0.0638411	0.0522098	-0.0466825	0.0356132	-0.0535702	-0.0468162	-0.0796203	0.100139	-0.0196468	-0.0515239	-0.0335805	-0.0537495	0.137069	0.0710595	-0.0449046	0.0745726	-0.0419259	-0.0309777	-0.0473578	-0.0507285	-0.0408296	-0.071731	-0.0520944
JUNB:ATF4	0.151114	0.1274	0.124387	0.17185	0.0678673	0.00617265	0.193819	-0.0408886	0.237271	0.207246	0.218174	0.431756	-0.028716	0.0166347	0.727378	0.0623861	0.475653	-0.0174463	0.0523678	0.955187	0.493817	0.227064	-0.00323016	0.972049	0.147414	0.127625	0.0107871	0.838648	0.142409	-0.0261293	-0.0368802	0.0298407	0.123193	0.3975	0.644458	-0.0319916	0.111282	0.404248	-0.0301329	0.201606	0.419125	-0.0199371	0.178205	0.81264	0.156439	-0.0320339	0.148328	0.187674	0.456465
JUN:CEBPG	0.787934	0.623425	0.713844	0.75358	-0.0506382	0.506382	0.125187	0.103617	0.117462	0.333217	0.347776	0.334805	0.0358216	0.717348	0.401039	0.284831	0.112774	0.16731	0.15716	0.369732	0.233144	0.0453634	0.534961	0.342128	0.419034	0.309353	0.0452103	0.463172	-0.00273721	-0.0332672	0.126721	-0.046902	-0.0571071	0.802772	0.251165	-0.0877635	0.0318135	0.276835	-0.0599809	0.815586	0.111953	0.215937	0.567499	0.39696	0.736877	-0.0838225	0.0823887	0.206079	0.161302
BATF:NFIL3	0.272499	0.163054	0.181329	0.18935	0.102709	0.0575195	0.213789	-0.095139	0.0897522	0.148663	0.16784	0.343818	0.0426911	0.104337	0.509675	0.0723306	0.334022	-0.0725769	0.217247	0.577939	0.318103	0.253794	0.0480316	0.581214	0.214815	0.110011	0.189147	0.543011	0.18515	-0.063077	-0.0865001	0.0959839	0.0918554	0.378845	0.390237	0.258668	0.182846	0.598229	-0.0535157	0.249489	0.363736	0.0090194	0.141333	0.600038	0.168631	0.230013	0.272112	0.337895	0.316169
JUN	0.132527	0.0403056	0.0527562	0.114685	0.0894437	-0.053568	0.35496	-0.088963	0.126803	0.527989	0.584479	0.671553	0.133806	-0.0180702	0.845105	0.423405	0.441087	-0.0773454	-0.00376358	0.885242	0.590836	0.28639	-0.0595141	0.836996	0.558911	0.481978	-0.0374937	0.945784	0.16043	-0.0657241	-0.0891581	0.0590013	0.0859454	0.427415	0.682694	-0.0529619	0.201037	0.397197	-0.0739578	0.166122	0.451176	0.321141	0.105356	0.782207	0.0976117	-0.0528465	0.220558	0.105326	0.527866
FOSL1:CEBPA	0.546639	0.379353	0.424388	0.426769	-0.0827223	0.364146	0.0795153	0.0641157	0.0521109	0.400201	0.377082	0.318323	0.0499867	0.521139	0.287668	0.380906	-0.0422481	0.089931	0.0147	0.125548	0.190763	-0.0668704	0.385887	0.0775387	0.339414	0.386388	-0.0401276	0.261246	-0.0614455	0.00917879	0.0727391	-0.0692337	-0.105285	0.554982	0.0156916	-0.0946724	-0.0245173	0.0365625	0.0540145	0.605535	-0.0337248	0.315071	0.256575	0.0681004	0.414816	-0.0895558	0.0174597	0.0434647	-0.0434063
ATF5:BATF3	0.0283725	-0.00545749	0.00998015	0.0422757	0.446765	-0.0538391	0.537531	-0.061592	0.0236105	0.0509257	0.0681255	0.43887	0.0280919	-0.0360842	0.439621	-0.0131338	0.8905	-0.0606972	-0.0192107	0.467894	0.317635	0.706112	-0.0521378	0.417665	0.0689603	0.0169792	-0.0296882	0.341087	0.573813	-0.0355474	-0.0631626	0.387472	0.527662	0.143289	0.274684	-0.0476394	0.596888	0.270558	-0.0382736	0.0446599	0.437808	-0.0520596	0.0697714	0.364689	0.0366658	-0.0462039	0.059173	0.0412367	0.518255
ATF4	0.110649	0.114104	0.108433	0.150132	0.0424283	-0.00577952	0.142962	-0.0389977	0.208435	0.170362	0.17685	0.360991	-0.0353943	0.000474334	0.63624	0.0423838	0.448836	-0.0216892	0.0204286	0.853112	0.419887	0.199655	-0.0135647	0.851137	0.117322	0.0985309	-0.011634	0.739787	0.112202	-0.0235409	-0.0371016	0.00828726	0.108063	0.347576	0.512779	-0.0188208	0.0744281	0.325395	-0.0268032	0.157246	0.327608	-0.0283993	0.179637	0.723581	0.138887	-0.0201872	0.171127	0.144305	0.350835
BATF2:ATF3	-0.0473506	-0.117051	-0.0922612	-0.0830498	0.493802	-0.0799841	0.781222	-0.069875	-0.119603	-0.026377	-0.00125548	0.329338	0.0610763	-0.0618949	0.234997	-0.0261883	0.540483	-0.0853544	-0.069452	0.0995143	0.269586	0.808536	-0.076963	0.0283601	0.0746185	-0.0198994	-0.0542362	0.0118296	0.668993	-0.0413119	-0.0767183	0.492173	0.528275	-0.0150447	0.043187	-0.0611099	0.749878	0.185687	-0.0429823	-0.0566686	0.406011	-0.0406282	-0.0799061	0.0477299	-0.0842659	-0.0572511	-0.0194483	-0.0604136	0.471919
FOSL1:BATF3	-0.0204978	-0.0816152	-0.0642311	-0.0604259	-0.0457717	-0.0831929	0.318867	-0.0677574	0.00313667	0.839215	0.793648	0.734394	0.280696	-0.0591634	0.650938	0.802344	0.0245017	-0.0836545	-0.0657688	0.274537	0.555741	-0.0071404	-0.0776435	0.130173	0.617324	0.813408	-0.0511743	0.521417	-0.028426	-0.0431465	-0.0744733	-0.0452289	0.0118314	0.135537	0.054066	-0.0330612	0.0580692	0.0453691	-0.044899	-0.0178085	0.00382344	0.683629	-0.0567159	0.0778914	-0.0595592	-0.0368457	0.150696	-0.029696	0.00580151
FOS:BATF3	0.134993	0.0671316	0.0764775	0.115229	0.179763	-0.0295159	0.45748	-0.0727032	0.167921	0.423107	0.427923	0.692796	0.0922723	-0.00649354	0.912226	0.294475	0.514293	-0.0580507	0.0345228	0.92895	0.69004	0.380151	-0.0366143	0.871187	0.346864	0.353499	0.00307765	0.859105	0.276553	-0.0474443	-0.0714129	0.136032	0.207698	0.393037	0.576211	-0.0361086	0.31984	0.428395	-0.0523081	0.171247	0.495273	0.172642	0.108667	0.716331	0.10024	-0.0387	0.196015	0.15949	0.486661
FOS:FOSL1	0.0241396	-0.0245559	-0.0121302	0.0220645	0.0522362	-0.0486115	0.210282	-0.0893429	-0.0487245	0.194851	0.220515	0.340861	0.0443881	-0.05619	0.469518	0.143648	0.26392	-0.0947657	-0.0460387	0.518442	0.351818	0.171431	-0.0564915	0.479243	0.17909	0.177077	-0.058656	0.474394	0.129787	-0.01432	-0.10137	0.0435641	-0.0765876	0.173467	0.296852	-0.0682642	0.209361	0.254026	-0.0154414	0.045595	0.277485	0.0710371	0.0371137	0.410852	0.0134135	-0.0708321	0.092513	0.005476	0.271907
NFE2	-0.0705762	-0.127814	-0.106208	-0.106671	-0.0631743	-0.108292	0.237592	-0.0676635	-0.0646657	0.811461	0.87075	0.606223	0.30844	-0.0837372	0.489041	0.893411	-0.0518054	-0.0896934	-0.0910458	0.103775	0.339372	-0.067396	-0.0963236	-0.00446792	0.665255	0.880983	-0.0687917	0.395306	-0.0571687	-0.0433328	-0.0758079	-0.0544702	-0.0212758	0.0541339	-0.0353495	-0.042907	0.00477542	-0.0679359	-0.0460761	-0.0719222	-0.0556162	0.988275	-0.100679	-0.0512036	-0.102333	-0.0428819	0.103525	-0.0826455	-0.0645121
JUNB:ATF2	0.189197	0.151779	0.145736	0.198817	0.0749554	0.0168291	0.201295	-0.0453871	0.249109	0.180971	0.202617	0.409887	-0.0444364	0.0309578	0.705722	0.0409547	0.468692	-0.0164217	0.0932351	0.952125	0.468042	0.259322	0.00510952	0.981089	0.158724	0.107669	0.046205	0.865133	0.139251	-0.0307877	-0.0388135	0.0360116	0.120236	0.446303	0.717284	-0.0402961	0.129623	0.470459	-0.0358916	0.230449	0.448703	-0.0395718	0.189428	0.894012	0.179258	-0.0395815	0.143096	0.232873	0.51941
NFE2:MAFG	-0.108055	-0.194075	-0.151817	-0.144718	-0.013634	-0.158262	0.162072	-0.102938	-0.17164	0.259525	0.330646	0.289642	0.925046	-0.115934	0.234333	0.320169	-0.0122351	-0.132688	-0.137439	0.0390028	0.138612	-0.00484397	-0.139326	-0.0327594	0.33877	0.325277	-0.105382	0.123929	-0.00499054	-0.0692751	-0.114033	-0.00828464	-0.0552609	-0.0727482	-0.0524542	0.118528	0.0729049	-0.0867811	-0.0756485	-0.109986	-0.0272037	0.297037	-0.139447	-0.0790571	-0.139985	0.113537	0.510007	-0.134739	-0.0402049
ATF5:CREBZF	0.137444	0.12178	0.121899	0.16274	0.0524379	0.00604329	0.158311	-0.0312101	0.214368	0.191825	0.196188	0.393669	-0.0238807	0.0203524	0.67497	0.0561748	0.45159	-0.00978022	0.0440827	0.872105	0.453075	0.185487	-0.000624517	0.87719	0.123522	0.114859	0.00740233	0.75008	0.134327	-0.0272657	-0.0275603	0.0197539	0.119539	0.346291	0.525262	-0.0231157	0.0845031	0.350005	-0.0313937	0.181929	0.366807	-0.0152968	0.176857	0.699858	0.149947	-0.0246245	0.14416	0.167836	0.382071
JUNB:CEBPE	0.229102	0.253701	0.229721	0.216229	-0.108995	0.18354	0.0297187	-0.00691675	0.0656384	0.386346	0.35626	0.282982	0.039703	0.258261	0.215601	0.374454	-0.092593	0.00740675	-0.0536973	0.0384193	0.140544	-0.115334	0.200619	-0.00755727	0.26802	0.373704	-0.0650882	0.182663	-0.100964	-0.0179887	-0.00578039	-0.094513	-0.0983251	0.350119	-0.0542526	-0.0791249	-0.0833943	-0.0375823	0.0447729	0.33209	-0.0995157	0.2999	0.195151	-0.0389987	0.229454	-0.0779619	-0.0048778	-0.031106	-0.110377
FOS:BATF	0.113942	0.04974	0.0588185	0.0960942	0.252533	-0.0183938	0.41698	-0.0591722	0.163371	0.2967	0.304644	0.614812	0.0481092	-0.00254885	0.832753	0.166179	0.543312	-0.0455194	0.00876922	0.900061	0.639302	0.40033	-0.0247222	0.854458	0.240543	0.225304	-0.0193567	0.767896	0.354585	-0.0367935	-0.0589265	0.225587	0.190386	0.332999	0.561254	-0.0332935	0.339352	0.414391	-0.0399685	0.15377	0.605975	0.0673456	0.0983152	0.662589	0.0828919	-0.03751	0.152704	0.12125	0.518381
ATF5:ATF6B	0.122491	0.11883	0.116216	0.158282	0.047236	-0.00155415	0.172209	-0.0429896	0.207592	0.174991	0.178371	0.372354	-0.033923	0.0102306	0.643952	0.0439547	0.453704	-0.0233534	0.0176908	0.846389	0.450431	0.196419	-0.0062982	0.851675	0.116346	0.100315	-0.0146907	0.73241	0.131721	-0.0246486	-0.0407584	0.0123413	0.133806	0.348833	0.512866	-0.0246265	0.087298	0.332435	-0.0285372	0.169163	0.320111	-0.0248775	0.183747	0.702583	0.147722	-0.0240721	0.131193	0.148364	0.356676
ATF5:BATF2	0.0633327	0.021541	0.0279415	0.0560963	0.33536	-0.0604253	0.641932	-0.0796309	0.112931	0.0599667	0.0803092	0.423356	-0.000244102	-0.0353308	0.468582	-0.0118498	0.799942	-0.0743261	0.0176227	0.517609	0.351866	0.71329	-0.0583171	0.472981	0.117718	0.0219898	0.00244096	0.393845	0.588182	-0.0466061	-0.0809037	0.296505	0.659409	0.193024	0.327083	-0.0663639	0.565741	0.34791	-0.0511111	0.0708827	0.429644	-0.0523882	0.0638565	0.447612	0.0457065	-0.0603743	0.0585922	0.123207	0.535
ATF5:CREB3L1	0.0892311	0.0747077	0.0803907	0.120776	0.107227	-0.025399	0.207845	-0.0489096	0.1521	0.147097	0.148725	0.375866	-0.0302536	-0.0114762	0.606121	0.0268037	0.523592	-0.0347763	0.0190885	0.772902	0.414865	0.268249	-0.0281838	0.76982	0.0795175	0.0777624	-0.00811221	0.651188	0.192891	-0.0309531	-0.0468048	0.0677658	0.17947	0.281239	0.435749	-0.0355328	0.16048	0.300515	-0.034758	0.128219	0.327226	-0.0386528	0.149965	0.625398	0.111646	-0.0356395	0.121426	0.122171	0.358247
ATF5:CREB3L3	0.106249	0.0936735	0.0982612	0.135386	0.0963861	-0.00463154	0.189755	-0.0339873	0.184852	0.174973	0.175338	0.397161	-0.0180718	0.00538476	0.646875	0.046193	0.495475	-0.017763	0.0226521	0.814523	0.449476	0.225063	-0.00845235	0.816075	0.0963202	0.100444	-0.00739196	0.682874	0.176936	-0.0204647	-0.0318086	0.0594562	0.155753	0.295003	0.454345	-0.0236367	0.12326	0.30404	-0.0230585	0.1492	0.345619	-0.0235732	0.160816	0.626648	0.125896	-0.0243962	0.13135	0.135982	0.359195
ATF5:FOS	0.135111	0.116394	0.111951	0.156861	0.0301345	-0.0141088	0.169479	-0.0523677	0.17611	0.164828	0.173665	0.350769	-0.032697	0.0132396	0.61399	0.0430344	0.431542	-0.0319954	0.0386031	0.819009	0.408563	0.192268	-0.0258976	0.81501	0.13629	0.0971113	0.00508435	0.701862	0.122452	-0.0635282	-0.0505153	0.0084664	0.107409	0.345339	0.512766	-0.0374319	0.118301	0.358184	-0.0693936	0.169158	0.323103	-0.0170853	0.15834	0.693777	0.138968	-0.0425162	0.125972	0.160534	0.357104
ATF5:JUN	0.188307	0.202371	0.163714	0.220187	0.0213956	0.0135776	0.160872	-0.0856443	0.12688	0.113888	0.137804	0.249336	-0.0133843	0.0318708	0.4125	0.0361374	0.370937	-0.0520535	0.106504	0.603095	0.204788	0.249855	-0.00119624	0.560991	0.223287	0.0749512	0.0837797	0.566595	0.121009	-0.0323604	-0.0798951	0.0134783	0.0809402	0.433033	0.469046	-0.0337908	0.157763	0.432754	-0.0390659	0.204945	0.284054	-0.00178521	0.210939	0.696023	0.198738	-0.0363231	0.133961	0.229158	0.354454
ATF5:JUNB	0.139282	0.1343	0.121161	0.182252	0.058418	-0.00788229	0.176549	-0.0540233	0.218162	0.158634	0.181862	0.369416	-0.0474542	0.00287178	0.638233	0.0308299	0.514885	-0.0317364	0.0374282	0.902101	0.4039	0.269506	-0.0185392	0.886537	0.148692	0.0923001	-0.00304874	0.808771	0.130537	-0.0346084	-0.0508195	0.0196639	0.13539	0.418216	0.660958	-0.036722	0.111914	0.401031	-0.0397231	0.185048	0.393652	-0.0435183	0.20585	0.846032	0.166263	-0.0357533	0.162185	0.166441	0.497055
FOS:BATF2	0.127331	0.0704863	0.0796446	0.107715	0.157945	-0.006116	0.406432	-0.0482654	0.170127	0.233727	0.238395	0.530518	0.0217027	0.00797703	0.791766	0.10517	0.463674	-0.0327351	0.0323673	0.874857	0.656724	0.32818	-0.0143042	0.832033	0.208882	0.162284	0.00358767	0.712621	0.26788	-0.0309824	-0.0466501	0.126168	0.178672	0.327664	0.506367	-0.037942	0.299862	0.396817	-0.0342099	0.165228	0.468633	0.0148025	0.104425	0.632937	0.094651	-0.0386658	0.128595	0.150223	0.425586
FOS:CREB3	0.111091	0.0506917	0.0645106	0.109405	0.108901	-0.00381004	0.261987	-0.0687258	0.122726	0.24308	0.252308	0.458799	-0.000869622	0.00332276	0.674904	0.124315	0.42953	-0.0575348	-0.0115344	0.807371	0.502853	0.241113	-0.0135092	0.804878	0.181226	0.178002	-0.044409	0.697323	0.191982	-0.0194586	-0.0713329	0.0827026	0.0823426	0.295332	0.530512	-0.0466951	0.186177	0.343179	-0.0225743	0.151785	0.404064	0.0433465	0.102596	0.628543	0.0934685	-0.0487786	0.113372	0.0981082	0.400712
FOS:DBP	0.49166	0.372781	0.390238	0.463339	0.107149	0.184008	0.283382	-0.0259027	0.149545	0.102242	0.123388	0.311187	-0.0539313	0.259995	0.502057	0.0175178	0.383706	0.0381563	0.376097	0.617045	0.333823	0.337395	0.16749	0.612194	0.255549	0.0604113	0.257049	0.587369	0.186989	-0.0454875	0.000829704	0.0792562	0.146813	0.623636	0.494659	-0.0890408	0.248905	0.67777	-0.0594506	0.484655	0.351012	-0.0464577	0.339132	0.78383	0.427102	-0.0855598	0.0806844	0.415702	0.427422
FOS:CREB3L3	0.0173697	-0.0301484	-0.0140566	0.00125797	0.044203	-0.0497103	0.158584	-0.0545173	0.000194066	0.0796163	0.0756628	0.208434	-0.0237239	-0.0351918	0.328631	0.0252114	0.165606	-0.051452	0.00580682	0.369424	0.29355	0.11691	-0.0503415	0.343601	0.0580044	0.0483237	-0.00462113	0.287836	0.0694903	-0.0370508	-0.0541608	0.0287708	0.0147411	0.0983612	0.208412	-0.0516533	0.14983	0.147219	-0.0413116	0.0328523	0.164437	-0.0188957	0.000779932	0.266237	-0.00389927	-0.0484397	0.0111936	0.0325569	0.16975
FOS:NFE2	-0.0779207	-0.163492	-0.124596	-0.123789	-0.0797281	-0.129315	0.155014	-0.0874037	-0.14134	0.540144	0.606065	0.442687	0.490612	-0.0893404	0.351431	0.62045	-0.0780989	-0.114112	-0.106094	0.0499579	0.218888	-0.0847276	-0.112725	-0.0256634	0.492284	0.619101	-0.0817726	0.259197	-0.0721755	-0.0606564	-0.0967708	-0.0682526	-0.0829051	-0.0030753	-0.0525757	0.0206749	-0.00557088	-0.097137	-0.0651613	-0.0811908	-0.0722168	0.598399	-0.123983	-0.072387	-0.119236	0.0186753	0.186968	-0.110416	-0.0822668
FOS:NFE2L1	0.179302	0.0142815	0.0764345	0.0697184	-0.0361167	0.0272909	0.283325	-0.0202614	-0.0201962	0.892454	0.917662	0.733828	0.331021	0.118889	0.644967	0.913953	0.0520414	-0.0405698	-0.0444632	0.279932	0.436966	-0.0051459	0.0369893	0.16657	0.719536	0.917912	-0.0524732	0.562496	-0.00146706	-0.0549877	-0.0296046	-0.0264365	-0.0102296	0.260396	0.0777221	0.087598	0.0343423	0.0360936	-0.0674755	0.147379	0.0465985	0.874242	0.0104929	0.109014	0.0648702	0.0798876	0.237095	-0.00475659	0.0276265
FOSL1:NFE2	0.0518626	-0.0731757	-0.0321823	-0.0146362	-5.06e-06	-0.0733271	0.342042	-0.0958155	-0.0674896	0.808396	0.871169	0.752104	0.437125	-0.0164615	0.686092	0.844792	0.118651	-0.112328	-0.0817322	0.35416	0.453045	0.0745431	-0.062222	0.244545	0.713452	0.859498	-0.075727	0.612005	0.0296712	-0.0609743	-0.103815	-0.00625951	-0.00764525	0.222053	0.175307	-0.0112838	0.12064	0.0960003	-0.071406	0.0503867	0.114091	0.785748	-0.0390304	0.210074	-0.0195493	-0.0130836	0.24508	-0.0402562	0.127032
FOSL1	0.131976	0.0749524	0.0819936	0.121249	0.0916644	-0.0171775	0.30738	-0.0581598	0.191838	0.332675	0.347098	0.563176	0.0592723	0.00219706	0.829674	0.203042	0.429767	-0.0420468	0.0233477	0.938932	0.62369	0.235775	-0.0243027	0.906462	0.284598	0.264428	-0.00895257	0.833003	0.178872	-0.0412234	-0.057373	0.0650538	0.11142	0.373185	0.595571	-0.0262655	0.196868	0.40039	-0.0460329	0.17735	0.455534	0.103443	0.114815	0.712091	0.105565	-0.0277889	0.170143	0.149312	0.434703
JUN:CEBPA	0.81763	0.692742	0.799788	0.785864	-0.037488	0.523647	0.0949212	0.112216	0.252585	0.239464	0.224772	0.300068	-0.0394196	0.757237	0.445665	0.148345	0.176822	0.179597	0.162059	0.498109	0.287046	0.0457291	0.595905	0.5006	0.250212	0.182596	0.0548074	0.504735	0.00756168	-0.0229765	0.133323	-0.0449436	0.0151277	0.837179	0.29135	-0.08748	-0.00794653	0.289426	-0.0535329	0.860837	0.157154	0.0784393	0.619556	0.462633	0.780943	-0.0798658	0.0571797	0.26808	0.175501
JUNB:CEBPA	0.762434	0.588696	0.717699	0.675228	-0.0798442	0.564671	0.0352139	0.154714	0.126698	0.274488	0.248288	0.196103	0.0361632	0.806596	0.160376	0.263927	-0.0696528	0.190044	0.069739	0.0222067	0.101644	-0.0822224	0.637612	-0.0125517	0.253526	0.263474	-0.00396062	0.129944	-0.0733819	-0.0025666	0.163992	-0.0691037	-0.0671867	0.617411	-0.0504191	-0.0685344	-0.0639691	0.0207271	-0.03263	0.758187	-0.0762144	0.216619	0.5217	0.0033743	0.686714	-0.0619633	0.0167178	0.104837	-0.0815709
JUNB:CEBPG	0.307607	0.341255	0.349831	0.425495	-0.0850131	0.273519	-0.0591102	0.112463	0.134706	0.0830481	0.0573201	0.0278204	-0.0606422	0.326731	0.0235671	0.072299	-0.0776118	0.155174	0.078915	-0.0131586	-0.0104797	-0.0953832	0.249521	-0.00699816	0.022236	0.0706291	0.0341361	0.029617	-0.0816713	-0.0239454	0.116483	-0.0737042	-0.0582137	0.25135	-0.0511255	-0.0704928	-0.079118	0.035164	-0.0356465	0.32022	-0.0828594	0.0542706	0.251827	-0.00647478	0.362218	-0.0668711	-0.0499749	0.118618	-0.0903073
JUNB:CREBZF	0.0897666	0.0161965	0.0363037	0.0719317	0.0444698	-0.038639	0.382996	-0.0778112	0.129971	0.581863	0.569205	0.715462	0.114853	-0.0232993	0.894109	0.452592	0.367014	-0.0730627	-0.017508	0.850813	0.793682	0.157271	-0.0380156	0.804247	0.396749	0.50776	-0.0372559	0.873769	0.120023	-0.019812	-0.0798949	0.0244157	0.0685677	0.32056	0.484234	-0.049231	0.113305	0.320048	-0.024851	0.126715	0.363885	0.331564	0.0731563	0.612368	0.0616578	-0.0502461	0.177551	0.0879828	0.344658
JUNB:DBP	0.199336	0.0433347	0.100629	0.127725	-0.0306635	-0.0255433	0.456921	-0.0886703	-0.0114713	0.571793	0.563628	0.590423	0.13519	0.049659	0.635736	0.510422	0.144921	-0.0839252	0.10431	0.440894	0.786315	0.0665524	-0.0210827	0.376945	0.490026	0.535307	0.0808986	0.584657	0.0174386	-0.076722	-0.0848278	-0.0321889	0.00100544	0.295817	0.221657	-0.0788709	0.0879698	0.349315	-0.0848064	0.179519	0.124975	0.417718	0.0587138	0.392926	0.110773	-0.0755688	0.120722	0.159653	0.145372
JUNB:HLF	0.281916	0.14767	0.192982	0.245014	-0.00292459	0.0227928	0.383227	-0.0737494	0.0418178	0.467444	0.477523	0.558689	0.0917407	0.0906054	0.681178	0.386043	0.287161	-0.0487774	0.189349	0.629215	0.678712	0.146874	0.0177965	0.588055	0.441605	0.426119	0.127993	0.709445	0.0529248	-0.0642655	-0.0617922	-0.019041	0.0255541	0.432322	0.398397	-0.0789101	0.109672	0.480326	-0.0768797	0.277504	0.234687	0.299656	0.177171	0.634623	0.221632	-0.0747909	0.142252	0.246277	0.280551
JUNB:JUN	-0.0547287	-0.167212	-0.110441	-0.095131	-0.0741258	-0.140232	0.399551	-0.11764	-0.123207	0.450693	0.474323	0.430938	0.235903	-0.0977355	0.442883	0.441049	0.0312702	-0.14835	-0.114577	0.257755	0.752844	-0.0318385	-0.128234	0.201051	0.367517	0.45338	-0.0891589	0.377637	-0.0455319	-0.0749279	-0.129513	-0.0608891	-0.0795143	0.024053	0.103823	0.0392204	-0.0112034	0.0703834	-0.0825604	-0.0581756	0.024654	0.383377	-0.0937253	0.150397	-0.0946733	0.0530949	0.254473	-0.0853128	0.0308672
JUNB:NFE2	0.169462	0.0103563	0.0756228	0.0958515	-0.0359999	-0.0203175	0.355892	-0.0648511	-0.00590124	0.426512	0.466626	0.493246	0.33708	0.069166	0.604509	0.39211	0.160931	-0.0772383	-0.035204	0.512604	0.671573	0.0428432	-0.0111505	0.467764	0.407554	0.42655	-0.0506145	0.577821	0.0142702	-0.0766583	-0.072052	-0.0370887	-0.0274283	0.268201	0.286801	-0.0565802	0.0366519	0.197016	-0.0884994	0.168024	0.16424	0.334358	0.0468753	0.383551	0.0859012	-0.0505164	0.144759	0.0341537	0.163386
JUNB:NFE2L1	0.0788803	-0.0588848	0.00317089	0.019503	-0.0400582	-0.066731	0.440242	-0.0753742	-0.0108088	0.552317	0.563782	0.568687	0.140979	-0.00308368	0.65064	0.498829	0.150942	-0.0926036	-0.0571287	0.500542	0.864831	0.0229219	-0.0563691	0.450409	0.419135	0.52719	-0.057469	0.601835	0.0071693	-0.0688607	-0.0830741	-0.0391259	-0.00937881	0.187076	0.247928	-0.0676329	0.0197321	0.181065	-0.0785914	0.0782852	0.146946	0.433583	-0.00388344	0.33729	0.0141887	-0.0610788	0.124964	0.00674576	0.13734
MAFB:ATF5	-0.0395015	-0.0683063	-0.0506466	-0.024159	0.0366748	-0.101087	0.01809	-0.099659	-0.0806386	0.015784	0.0398956	0.125598	0.129325	-0.0772575	0.176967	-0.00264509	0.200472	-0.117427	-0.0831222	0.208728	0.0381082	0.13729	-0.0940338	0.163427	0.0694562	0.011168	-0.074132	0.185941	0.100309	-0.0638688	-0.106576	0.0591147	-0.0119708	0.045765	0.130308	0.653243	0.0380698	0.0957332	-0.0723968	-0.0461947	0.144396	-0.0464357	0.0200877	0.219836	-0.0244339	0.596434	0.495306	-0.0581456	0.133132
[truncated: 53 more columns]
