# Supplementary material for: Combinatorial bZIP dimers display complex DNA-binding specificity landscapes
Source: eLife journal article supplement (doi:10.7554/elife.19272), 2017-02-10
Supplement: supp [file elife-19272-supp-v1.zip › elife_poa_e19272_Figure_2_source_data_1.xlsx]

## Sheet: Sheet1
Title. Relative CSI intensity for 102 bZIP dimers for different DNA binding sites and half-sites. Given is the highest CSI intensity of all the 10mers matching the site.
		JUN∙CEBPG	ATF3∙CEBPA	JUN∙CEBPA	JUNB∙CEBPA	BATF3∙CEBPG	BATF∙CEBPG	BATF3∙CEBPA	ATF3∙CEBPG	FOSL1∙CEBPG	FOS∙CEBPG	ATF5∙CEBPE	ATF4∙CEBPA	ATF4∙CEBPG	ATF5∙CEBPA	ATF5∙CEBPG	JUNB∙CEBPE	FOSL1∙CEBPA	JUNB∙JUN	FOS∙NFE2	NFE2L1	NFE2	FOSL1∙ATF3	FOS∙ATF3	JUN∙ATF3	FOS∙NFE2L1	FOSL1∙NFE2	JUNB∙FOS	JUNB∙FOSL1	FOSL1∙BATF3	FOS∙JUN	FOSL1∙JUN	BATF∙CEBPE	BATF∙CEBPA	FOS∙CEBPE	FOSL1∙CEBPE	CEBPG	CEBPA	CEBPE	JUNB∙CEBPG	DDIT3∙CEBPG	DBP	HLF	NFIL3	NFE2∙MAFG	NFE2L1∙MAFG	MAFB	MAFG	FOS∙MAFB
JUN∙ATF3	TGACGTCA	0.70526	1	1	0.05155	0.11278	0.12026	0.11013	0.26806	0.43039	0.50762	0.36358	0.58438	0.46515	0.51617	0.52862	0.10401	0.26094	0.76887	0.10602	0.03323	0.11206	0.15554	0.16697	0.36711	0.47217	0.48365	0.18811	0.29959	0.28179	0.42309	0.47833	0.0024727	0.0023763	0.003506	0.051767	0.0036243	0.015047	0.05207	0.064877	1	0.056409	0.20527	0.3445	0.034574	0.017453	0.061091	0.054536	0.37196
	TGAGTCA	0.49995	0.30271	0.27508	0.493	0.0042295	0.0086796	0.0043653	0.030175	0.032842	0.052905	0.064428	0.27493	0.074182	0.047048	0.04206	0.67555	0.69814	0.66142	0.9925	1	1	0.54721	0.96435	0.82591	1	1	1	1	1	1	1	0.0023623	0.00014551	0.070933	0.14023	0.0014002	0.0047235	0.021036	0.18913	0.14989	0.0010716	0.0042732	0.019313	1	1	0.7881	0.85677	1
	TGACGCAT	0.32043	0.10033	0.12054	0.038587	0.0015133	0.0049031	0.0019608	0.011769	0.03129	0.010657	0.018218	0.040021	0.0072832	0.0099035	0.015155	0.040911	0.056184	0.20373	0.13447	0.091562	0.026658	0.16769	0.15578	1	0.046299	0.10642	0.063429	0.063173	0.15131	0.10223	0.23357	0.00027943	7.0876e-05	0.0013403	0.012668	0.00039408	0.0026367	0.0062498	0.019916	0.034029	0.00087268	0.003572	0.014915	0.095223	0.11673	0.00063442	0.012738	0.048688
	CCTGACGTCA	-0.014559	0.17997	0.009731	0.0046662	0.0027656	0.016191	0.0025278	0.019557	0.00033785	0.018857	0.072955	0.12722	0.03462	0.067299	0.072022	0.00962	0.0067699	0.017185	0.0038442	-0.00019621	0.00077714	0.05172	0.029545	0.17667	-0.0010256	0.033534	0.0033065	0.0046387	0.021098	0.00061773	0.0095312	0.00058864	0.00018206	0.0006117	0.0015289	3.147e-05	0.00020611	0.0070113	0.0036244	0.031544	-0.0001166	0.00026848	0.0097656	0.0022669	-0.00096001	-0.00020821	-0.0028299	0.012758
	ATGACGTCAT	0.70526	1	1	0.05155	0.10779	0.12026	0.098638	0.26806	0.43039	0.50762	0.36358	0.58438	0.46515	0.51617	0.52862	0.10401	0.26094	0.76887	0.10602	0.03323	0.11206	0.15554	0.1165	0.36711	0.47217	0.46643	0.18811	0.29959	0.28179	0.42309	0.47833	0.002041	0.0017781	0.003506	0.051767	0.0036243	0.015047	0.05207	0.064877	1	0.056409	0.20527	0.3445	0.034574	0.013783	7.7292e-05	0.013055	0.27806
ATF4∙CEBPG	TGACGCAA	1	0.79266	0.69977	1	1	0.8021	0.7209	1	1	1	0.66001	0.92886	1	1	1	0.33283	0.80284	0.064404	0.086167	0.0022971	0.0016013	0.076811	0.081829	0.26705	0.48972	0.18021	0.0040088	0.005972	0.027227	0.00057412	0.017899	0.0046219	0.015484	0.0031806	0.035093	0.30748	0.29211	0.25901	0.30761	0.339	0.070185	0.278	0.22418	0.030243	0.022925	0.00027805	0.0048195	0.06779
	ATGACGCAAT	1	0.75425	0.69977	1	0.95417	0.67755	0.59511	1	1	0.91957	0.24481	0.92886	1	0.86407	0.90162	0.33283	0.76459	0.01027	0.086167	0.00091732	0.0016013	0.046638	0.059833	0.26705	0.48972	0.18021	0.0034711	0.0031154	-0.00026792	0.00057412	0.015119	0.0010429	0.0076818	0.0026526	0.029369	0.30748	0.29211	0.25901	0.30761	0.339	0.070185	0.24477	0.22418	0.0081368	0.0075901	-7.6385e-05	0.00073835	0.061255
	ATGACGTAAT	0.24565	0.60634	0.28599	0.14359	0.30648	0.21999	0.22626	0.52961	0.31774	0.48203	0.18876	0.69481	0.65212	0.4882	0.50175	0.086181	0.20811	0.099716	0.028584	0.00085868	0.0045194	0.052917	0.038864	0.31267	0.11961	0.12919	0.0094561	0.016968	0.057627	0.010363	0.039186	0.00086473	0.0023097	0.00040432	0.0090408	0.05084	0.078392	0.088784	0.1699	0.43724	0.48685	0.72763	0.69967	0.0085456	0.002098	-9.6685e-05	0.01059	0.063737
	ATGACGGAAT	0.018421	0.10454	0.0042453	0.0041336	0.0017877	0.0066069	0.00019255	0.012788	0.0004503	0.021532	0.046998	0.13266	0.016219	0.043767	0.042802	0.0051335	0.0038088	0.019569	0.0016155	0.0005002	0.00036848	0.049311	0.036242	0.099357	0.0071179	0.057462	0.00021032	-0.00063151	-0.00026792	-4.4127e-05	0.0022451	-0.00011049	2.1631e-05	0.00013403	-0.0042217	0.00016802	0.00069255	0.0062948	0.0017528	0.032826	0.00059145	8.6084e-05	0.0093524	0.00087405	0.0017504	-0.00015617	0.0045431	0.0035217
	ATGATGCAAT	0.44519	0.655	0.67879	0.92662	0.78007	0.55309	0.72498	0.53802	0.49806	0.64013	0.40168	1	0.96523	0.75572	0.68735	0.31425	0.36781	0.054832	0.039319	0.00021846	0.00052898	0.0041154	0.011424	0.13607	0.17402	0.1197	0.00011901	-0.00025403	0.0028718	0.00018575	0.002569	0.00092814	0.011515	0.00086466	0.01357	0.13341	0.1239	0.13926	0.25197	0.57356	0.0059406	0.058749	0.10711	0.0057958	0.0057876	-2.1911e-05	0.0035658	0.024623
Half-sites	TGA	1	1	1	1	1	0.8021	0.98393	1	1	1	1	1	1	1	1	1	1	0.76887	1	1	1	1	1	1	1	1	1	1	1	1	1	0.32482	0.29236	1	1	0.30748	0.29211	0.25901	0.30761	1	0.52234	0.9511	0.69967	1	1	1	1	1
	TGAC	1	1	1	1	1	0.8021	0.7209	1	1	1	0.66001	0.92886	1	1	1	0.67555	0.80284	0.76887	1	1	1	0.54721	0.96435	1	1	1	1	1	1	1	1	0.2811	0.22619	0.070933	0.14023	0.30748	0.29211	0.25901	0.30761	1	0.52234	0.9511	0.69967	1	1	1	1	1
	TTGC	1	0.79266	0.69977	1	1	1	1	1	1	1	1	1	1	1	1	1	1	0.2501	0.086167	0.16128	0.13704	0.076811	0.13477	0.26705	0.48972	0.18021	0.058485	0.057658	0.029369	0.034959	0.068366	1	1	1	1	1	1	1	1	0.88309	0.25178	0.67534	0.38219	0.45379	0.55139	1	1	0.35349
	TTAC	0.44972	0.64077	0.28599	0.15228	0.36558	0.34418	0.31133	0.53948	0.39497	0.49907	0.64578	0.73937	0.65212	0.70769	0.74224	0.92261	0.29028	0.099716	0.76747	0.052748	0.042468	0.11785	0.17928	0.31267	0.11961	0.15138	0.028587	0.026784	0.066601	0.026475	0.054759	0.055702	0.034806	0.28187	0.24735	0.56418	0.49326	0.44323	0.45189	0.58524	1	1	1	0.29872	0.11407	0.13928	0.10597	0.12822
	TGCTGA	0.10537	0.12614	0.028996	0.031919	0.16147	0.30315	0.29389	0.036779	0.046497	0.048949	0.15436	0.18711	0.13235	0.14853	0.11984	0.060255	0.061438	0.5087	0.52737	0.016738	0.029017	0.13004	0.20014	0.23716	0.11633	0.23669	0.043972	0.044116	0.014277	0.015888	0.077796	0.02896	0.013771	0.01152	0.016153	0.011149	0.018651	0.033813	0.014942	0.22476	0.0078201	0.03353	0.014923	0.66038	0.671	1	1	1
	GTGG	0.13009	0.24426	0.057158	0.031914	0.10318	1	1	0.054648	0.10608	0.12263	0.12968	0.31012	0.091653	0.14256	0.14455	0.036052	0.066973	0.094401	0.76747	0.062651	0.043123	0.11805	0.15128	0.19413	0.075151	0.14232	0.08298	0.081529	0.062478	0.040506	0.082936	1	1	0.034417	0.068486	0.04275	0.1052	0.13251	0.014249	0.48481	0.14166	0.26542	0.065389	0.18344	0.19455	0.014411	0.060973	0.11536
[truncated: 54 more columns]
