# Supplementary material for: Combinatorial bZIP dimers display complex DNA-binding specificity landscapes
Source: eLife journal article supplement (doi:10.7554/elife.19272), 2017-02-10
Supplement: supp [file elife-19272-supp-v1.zip › elife_poa_e19272_Supplementary_File_1.xlsx]

## Sheet: A. bZIP sequences
Supplementary file 1A. Amino acid sequences of bZIP peptides used in this project and bZIP dimers tested.
Family	Name	Protein sequence[1]
DDIT3	DDIT3	LAQEEEEEDQGRTRKRKQSGHSPARAGKQRMKEKEQENERKVAQLAEENERLKQEIERLTREVEATRRALIDRMVNLHQA
CEBPG	CEBPG	KKSSPMDRNSDEYRQRRERNNMAVKKSRLKSKQKAQDTLQRVNQLKEENERLEAKIKLLTKELSVLKDLFLEHAHNLA
CEBP	CEBPA	KAKKSVDKNSNEYRVRRERNNIAVRKSRDKAKQRNVETQQKVLELTSDNDRLRKRVEQLSRELDTLRGIFRQL
CEBP	CEBPE	KGKKAVNKDSLEYRLRRERNNIAVRKSRDKAKRRILETQQKVLEYMAENERLRSRVEQLTQELDTLRNLFRQI
CREB	CREB1	LPTQPAEEAARKREVRLMKNREAARECRRKKKEYVKCLENRVAVLENQNKTLIEELKALKDLYCHKSD
OASISA	CREB3	LPLTKTEEQILKRVRRKIRNKRSAQESRRKKKVYVGGLESRVLKYTAQNMELQNKVQLLEEQNLSLLDQLRKLQAMVIEIS
OASISA	CREB3L3	LPLTKYEERVLKKIRRKIRNKQSAQESRKKKKEYIDGLETRMSACTAQNQELQRKVLHLEKQNLSLLEQLKKLQAIVV
OASISB	CREB3L1	LPLTKAEEKALKRVRRKIKNKISAQESRRKKKEYVECLEKKVETFTSENNELWKKVETLENANRTLLQQLQKLQTLVT
CREBZF	CREBZF	GGGSGNDNNQAATKSPRKAAAAAARLNRLKKKEYVMGLESRVRGLAAENQELRAENRELGKRVQALQEESRYLRAVLA
XBP1	XBP1	RQRLTHLSPEEKALRRKLKNRVAAQTARDRKKARMSELEQQVVDLEEENQKLLLENQLLREKTHGLVVENQELRQRL
ATF6	ATF6	MRNVGSDIAVLRRQQRMIKNRESACQSRKKKKEYMLGLEARLKAALSENEQLKKENGTLKRQLDEVVSENQRLKV
ATF6	ATF6B	SCPPEVDAKLLKRQQRMIKNRESACQSRRKKKEYLQGLEARLQAVLADNQQLRRENAALRRRLEALLAENSELKL
NFIL3	NFIL3	REFIPDEKKDAMYWEKRRKNNEAAKRSREKRRLNDLVLENKLIALGEENATLKAELLSLKLKFGLISSTAY
PAR	DBP	KIQVPEEQKDEKYWSRRYKNNEAAKRSRDARRLKENQISVRAAFLEKENALLRQEVVAVRQELSHYRAVLSRYQAQH
PAR	HLF	KVFIPDDLKDDKYWARRRKNNMAAKRSRDARRLKENQIAIRASFLEKENSALRQEVADLRKELGKCKNILAKYEARH
ATF2	ATF2	RRRAANEDPDEKRRKFLERNRAAASRCRQKRKVWVQSLEKKAEDLSSLNGQLQSEVTLLRNEVAQLKQLLLAHKD
JUN	JUN	SPIDMESQERIKAERKRMRNRIAASKCRKRKLERIARLEEKVKTLKAQNSELASTANMLREQVAQLKQKVMNHV
JUN	JUNB	SPINMEDQERIKVERKRLRNRLAATKCRKRKLERIARLEDKVKTLKAENAGLSSTAGLLREQVAQLKQKVMTHV
FOS	FOS	KVEQLSPEEEEKRRIRRERNKMAAAKCRNRRRELTDTLQAETDQLEDEKSALQTEIANLLKEKEKLEFILAAHR
FOS	FOSL1	PCEQISPEEEERRRVRRERNKLAAAKCRNRRKELTDFLQAETDKLEDEKSGLQREIEELQKQKERLELVLEAHR
ATF4	ATF4	VAAKVKGEKLDKKLKKMEQNKTAATRYRQKKRAEQEALTGECKELEKKNEALKERADSLAKEIQYLKDLIEEVRKAR
ATF4	ATF5	PYPHPATTRGDRKQKKRDQNKSAALRYRQRKRAEGEALEGECQGLEARNRELKERAESVEREIQYVKDLLIEVYKAR
ATF3	ATF3	TKAEVAPEEDERKKRRRERNKIAAAKCRNKKKEKTECLQKESEKLESVNAELKAQIEELKNEKQHLIYMLNLHR
BATF	BATF	PPGKQDSSDDVRRVQRREKNRIAAQKSRQRQTQKADTLHLESEDLEKQNAALRKEIKQLTEELKYFTSVLNSHE
BATF	BATF2	GLLTQTDPKEQQRQLKKQKNRAAAQRSRQKHTDKADALHQQHESLEKDNLALRKEIQSLQAELAWWSRTLHVHERLCP
BATF	BATF3	QPQQQSPEDDDRKVRRREKNRVAAQRSRKKQTQKADKLHEEYESLEQENTMLRREIGKLTEELKHLTEALKEHE
SMAF	MAFF	RGLSAEEVTRLKQRRRTLKNRGYAASCRVKRVCQKEELQKQKSELEREVDKLARENAAMRLELDALRGKCEALQGFARSVA
SMAF	MAFG	TDEELVTMSVRELNQHLRGLSKEEIVQLKQRRRTLKNRGYAASCRVKRVTQKEELEKQKAELQQEVEKLASENASMKLELDALRSKYEALQTFARTVARS
LMAF	MAF	RGVSKEEVIRLKQKRRTLKNRGYAQSCRFKRVQQRHVLESEKNQLLQQVDHLKQEISRLVRERDAYKEKYEKLV
LMAF	MAFB	SDDQLVSMSVRELNRHLRGFTKDEVIRLKQKRRTLKNRGYAQSCRYKRVQQKHHLENEKTQLIQQVEQLKQEVSRLARERDAYKVKCEKLANSG
NFE2	NFE2	EAGSRDERRALAMKIPFPTDKIVNLPVDDFNELLARYPLTESQLALVRDIRRRGKNKVAAQNCRKRKLETIVQLERELERLTNERERLLRARGEADRTLEVMRQQLTELYRDIFQHL
NFE2	NFE2L1	KQMSRDEHRARAMKIPFTNDKIINLPVEEFNELLSKYQLSEAQLSLIRDIRRRGKNKMAAQNCRKRKLDTILNLERDVEDLQRDKARLLREKVEFLRSLRQMKQKVQSLYQEVFGRL
NFE2	NFE2L2	EQFNEAQLALIRDIRRRGKNKVAAQNCRKRKLENIVELEQDLDHLKDEKEKLLKEKGENDKSLHLLKKQLSTLYLEVFSML
NFE2	NFE2L3	YYLTDLQVSLIRDIRRRGKNKVAAQNCRKRKLDIILNLEDDVCNLQAKKETLKREQAQCNKAINIMKQKLHDLYHDIFSRL
BACH	BACH1	HKLTPEQLDCIHDIRRRSKNRIAAQRCRKRKLDCIQNLESEIEKLQSEKESLLKERDHILSTLGETKQNLTGLCQKV
BACH	BACH2	HKLTSEQLEFIHDVRRRSKNRIAAQRCRKRKLDCIQNLECEIRKLVCEKEKLLSERNQLKACMGELLDNFSCLSQEV
[1] all sequences contained the linkers SHHHHHHDWKGSS at the N-terminus and GA at the C-terminus
bZIP dimers tested in this work.
ATF2
ATF2•ATF4
ATF2•ATF6 (EMSA)
ATF2•BATF2 (EMSA)
ATF2•CEBPA
ATF2•CEBPG
ATF2•CREB1 (EMSA)
ATF3
ATF3•ATF2
ATF3•CEBPA
ATF3•CEBPG
ATF3•CREB1
ATF3•DBP
ATF3•DDIT3
ATF3•MAFGEX
ATF3•NFE2L1EX
ATF4
ATF4•ATF3
ATF4•CEBPA
ATF4•CEBPG
ATF4•DDIT3
ATF4•MAFGEX
ATF5
ATF5•ATF2
ATF5•ATF3
ATF5•ATF4
ATF5•ATF6
ATF5•ATF6B
ATF5•BATF
ATF5•BATF2
ATF5•BATF3
ATF5•CEBPA
ATF5•CEBPE
ATF5•CEBPG
ATF5•CREB1
ATF5•CREB3
ATF5•CREB3L1
ATF5•CREB3L3
ATF5•CREBZF
ATF5•DBP
ATF5•DDIT3
ATF5•FOS
ATF5•FOSL1
ATF5•HLF
ATF5•JUN
ATF5•JUNB
ATF5•MAFG
ATF5•NFE2
ATF5•NFE2L1
ATF5•NFIL3
ATF5•XBP1
ATF6
ATF6•CEBPG
ATF6•XBP1
ATF6B
BACH1
BACH1•ATF3
BACH2
BACH2•ATF3
BACH2•MAFG
BATF
BATF•ATF3
BATF•CEBPA
BATF•CEBPE
BATF•CEBPG
BATF•DBP
BATF•DDIT3
BATF•HLF
BATF•NFIL3
BATF2
BATF2•ATF3
BATF2•ATF4
BATF2•BACH2
BATF2•JUN
BATF2•NFE2L1EX
BATF3
BATF3•ATF3
BATF3•ATF4
BATF3•CEBPA
BATF3•CEBPG
BATF3•DBP
BATF3•JUN
BATF3•MAFGEX
BATF3•NFIL3
CEBPA
CEBPA•DBP
CEBPE
CEBPE•ATF3
CEBPG
CREB1
CREB3
CREB3L1
CREB3L3
CREBZF
CREBZF•ATF4
CREBZF•NFE2L1EX
CREBZF•XBP1
DBP
DBP•CEBPG
DDIT3
DDIT3•ATF2
DDIT3•BATF3
DDIT3•CEBPA
DDIT3•CEBPG
DDIT3•DBP
DDIT3•FOS
DDIT3•JUN
DDIT3•NFIL3
FOS
FOS•ATF2
FOS•ATF3
FOS•ATF4
FOS•ATF6 (2nd round)
FOS•ATF6B
FOS•BATF
FOS•BATF2
FOS•BATF3
FOS•CEBPA
FOS•CEBPE
FOS•CEBPG
FOS•CREB1
FOS•CREB3
FOS•CREB3L1
FOS•CREB3L3
FOS•CREBZF
FOS•DBP
FOS•FOSL1
FOS•HLF
FOS•JUN
FOS•MAFB
FOS•MAFG
FOS•NFE2
FOS•NFE2L1
FOS•NFIL3
FOS•XBP1
FOSL1
FOSL1•ATF2
FOSL1•ATF3
FOSL1•ATF4
FOSL1•ATF6
FOSL1•ATF6B
FOSL1•BATF
FOSL1•BATF2
FOSL1•BATF3
FOSL1•CEBPA
FOSL1•CEBPE
FOSL1•CEBPG
FOSL1•CREB1
FOSL1•CREB3
FOSL1•CREB3L1
FOSL1•CREB3L3
FOSL1•CREBZF
FOSL1•DBP
FOSL1•DDIT3
FOSL1•HLF
FOSL1•JUN
FOSL1•MAFG
FOSL1•NFE2
FOSL1•NFE2L1
FOSL1•NFIL3
FOSL1•XBP1
HLF
JUN
JUN•ATF2
JUN•ATF3
JUN•ATF4
JUN•CEBPA
JUN•CEBPG
JUNB
JUNB•ATF2
JUNB•ATF3
JUNB•ATF4
JUNB•ATF6
JUNB•ATF6B
JUNB•BATF
JUNB•BATF2
JUNB•BATF3
JUNB•CEBPA
JUNB•CEBPE
JUNB•CEBPG
JUNB•CREB1
JUNB•CREB3
JUNB•CREB3L1
JUNB•CREB3L3
JUNB•CREBZF
JUNB•DBP
JUNB•DDIT3
JUNB•FOS
JUNB•FOSL1
JUNB•HLF
JUNB•JUN
JUNB•MAFB
JUNB•MAFG
JUNB•NFE2
JUNB•NFE2L1
JUNB•NFE2L2
JUNB•NFE2L3
JUNB•NFIL3
JUNB•XBP1
MAF
MAFB•ATF2
MAFB•ATF3
MAFB•ATF4
MAFB•ATF5
MAFB•ATF6
MAFB•ATF6B
MAFB•BATF
MAFB•BATF2
MAFB•BATF3
MAFB•CEBPE
MAFB•CEBPG
MAFB•CREB1
MAFB•CREB3
MAFB•CREB3L1
MAFB•CREB3L3
MAFB•CREBZF
MAFB•DBP
MAFB•DDIT3(2nd)
MAFB•FOSL1
MAFB•HLF
MAFB•JUN
MAFB•NFIL3
MAFB•XBP1
MAFBex
MAFF
MAFG•ATF6
MAFG•ATF6B
MAFG•BATF2
MAFG•CEBPA
MAFG•CEBPE
MAFG•CEBPG
MAFG•CREB1
MAFG•CREB3
MAFG•CREB3L1
MAFG•CREBZF
MAFG•DBP
MAFG•DDIT3
MAFG•JUN
MAFG•NFIL3
MAFG•XBP1
MAFGex
NFE2
NFE2•ATF6
NFE2•ATF6B
NFE2•CEBPA
NFE2•CEBPE
NFE2•CEBPG
NFE2•CREB1
NFE2•CREB3
NFE2•CREB3L1
NFE2•CREBZF
NFE2•DBP
NFE2•DDIT3
NFE2•HLF
NFE2•MAFG
NFE2•NFIL3
NFE2•XBP1
NFE2L1
NFE2L1•ATF4
NFE2L1•CEBPA
NFE2L1•CEBPE
NFE2L1•CEBPG
NFE2L1•CREB1
NFE2L1•CREB3
NFE2L1•DDIT3
NFE2L1•MAFG
NFE2L2
NFE2L3
NFIL3
XBP1

## Sheet: B. DNA library & primers
Supplementary file 1B. Oligonucleotides used for CSI HT-SELEX were purchased from IDT (Standard desalting). N stands for randomized positions; X stands for 6 base-pair barcode
20mer DNA library	5'- CTGATCCTACCATCCGTGCTNNNNNNNNNNNNNNNNNNNNCACAGCTTCGTACCGAGCGG -3'
reversePrimer	5’- CCGCTCGGTACGAAGCTG -3’
forwardPrimer	5’- CTGATCCTACCATCCGTGCT -3’
forwardPrimer + Illumina adapter	5’- AATGATACGGCGACCACCGAGATCTGCTCTTCCGATCTCTGATCCTACCATCCGTGCT -3’
reversePrimer + Illumina adapter	5'- CAAGCAGAAGACGGCATACGAGATXXXXXXTCTTCCGATCCCGCTCGGTACGAAGCTGTG -3‘
squencingPrimer	5’- GCTCTTCCGATCTCTGATCCTACCATCCGTGCT -3’

## Sheet: C. DNA stabilized dimers
Supplementary file 1C. bZIP dimers stabilized by DNA. Interaction for these bZIP pairs is not detected at 21oC, but the pair gave a motif attributable to the heterodimer in SELEX-seq.
ATF5•ATF6B
ATF5•BATF2
ATF5•CREB3L1
ATF5•CREB3L3
ATF5•CREBZF
ATF5•FOS
ATF5•JUN
ATF5•JUNB
FOS•BATF
FOS•BATF2
FOS•CREB3
FOS•CREB3L3
FOS•DBP
FOS•NFE2
FOS•NFE2L1
FOSL1
FOSL1•NFE2
JUN•CEBPA
JUNB•CEBPA
JUNB•CEBPE
JUNB•CEBPG
JUNB•CREBZF
JUNB•DBP
JUNB•HLF
JUNB•JUN
JUNB•NFE2
JUNB•NFE2L1
MAFB•ATF5
NFE2•MAFG

## Sheet: D. Oligos for EMA
Supplementary file 1D. Oligonucloetide sequences used in EMSA-FRET.
Name	Sequence 5' -> 3'
CRE	GAGTCCATGACGTCATCCGTAG
CRE-L	GAGTCCATGACGTGGCCCGTAG
TRE	GAGTCCATGAGTCATCCGTAG
PAR	GAGTCCATTACGTAATCCGTAG
CAAT	GAGTCCATTGCGCAATCCGTAG
MARE	GAGTCCTGCTGAGTCAGCACCGTAG
AP1/CAAT	GAGTCCATGAGCAATCCGTAG
CRE/PAR	GAGTCCATGACGTAATCCGTAG
CRE/CAAT	GAGTCCATGACGCAATCCGTAG
CREA/PAR	GAGTCCGCCACGTAATCCGTAG
CREA/CAAT	GAGTCCGCCACGCAATCCGTAG
PAR/CAAT	GAGTCCATTACGCAATCCGTAG
MARE/AP1	GAGTCCTGCTGAGTCATCCGTAG
MARE/CRE	GAGTCCTGCTGACGTCATCCGTAG
MARE/CREA	GAGTCCTGCTGACGTGGCCCGTAG

## Sheet: E. ROC-AUC
Supplementary file 1E. Area Under the Receiver Operating Characteristic curve (AUC-ROC) for explaining ATF3 bound regions using CSI intensities for ATF3 homodimer or ATF3 containing heterodimers.
		ChIP-Seq
		H1	K562	HEPG2	GBM1
CSI SELEX-Seq	ATF3	0.67	0.77	0.69	0.77
	JUNB•ATF3	0.6	0.74	0.6	0.82
	JUN•ATF3	0.59	0.74	0.6	0.85
	FOS•ATF3	0.59	0.72	0.6	0.82
	FOSL1•ATF3	0.57	0.72	0.58	0.81
	ATF3•CEBPG	0.61	0.67	0.63	0.67
	ATF3•CEBPA	0.63	0.73	0.64	0.75
	BATF•ATF3	0.52	0.55	0.53	0.56
	BATF2•ATF3	0.62	0.68	0.64	0.63
	BATF3•ATF3	0.69	0.72	0.7	0.64

## Sheet: F. Expression of bZIP genes
Supplementary file 1G. mRNA expression of selected bZIP genes in H1, HEPG2, K562, and GBM1 cell lines.
		normalized RPKM*			normalized RPKM**
Supplementary file 1F. RNA-Seq data for bZIP genes in different cell lines
Gene	Gene Symbol	H1.hESC	HepG2	K562	GBM1-dox(48h)-arvanil(24h)-BMP7(3h)	GBM1-dox(48h)-arvanil(24h)-BMP7(3h)_2
ENSG00000162772	ATF3	3.08161	3.03091	2.56767	8.16783	8.11589
ENSG00000156127	BATF	0.01638	0.240082	0.061289	2.21987	1.59906
ENSG00000168062	BATF2	1.11651	0.971603	2.53725	4.10936	4.68703
ENSG00000123685	BATF3	0.630068	0.029546	0.167289	1.15024	0.857411
ENSG00000245848	CEBPA	0.95975	14.5536	0.095194	8.91013	8.7766
ENSG00000153879	CEBPG	7.54476	13.3688	14.7825	9.74536	9.7432
ENSG00000170345	FOS	12.6223	4.735	1.1903	8.71878	8.76184
ENSG00000175592	FOSL1	3.21522	1.24262	2.58364	10.0602	10.0614
ENSG00000177606	JUN	3.40993	12.7654	3.56476	12.3974	12.362
ENSG00000171223	JUNB	6.15686	6.3165	9.76554	9.40303	9.28175
*Data downloaded from https://www.encodeproject.org/comparative/transcriptome/ and used without further processing.
**Data obtained from Table S4. ATF3 ChIP-seq and RNA-seq Analyses of Gargiulo et al. In Vivo RNAi Screen for BMI1 Targets Identifies TGF-β/BMP-ER Stress Pathways as Key Regulators of Neural- and Malignant Glioma-Stem Cell Homeostasis, 2013, Cancer Cell 2013 23 (5) p660-676 and used without further processing.

## Sheet: G. ATF3 dimers in ChIP-Se
Supplementary file 1G. Fraction of ChIP-Seq peaks detected as positive at different false positive rate (FRP) cutoffs by the in vitro binding specificity of either the ATF3 homodimer (left) or by at least one of the ATF3 dimers (homodimer + 9 heterodimers). ChIP-Seq peaks for the specified cell lines were used, as described in the Results and Experimental Procedures.
	Only ATF3 homodimer							Combined ATF3 dimers
	FPR cutoff	0.01	0.05	0.1	0.2			FPR cutoff	0.01	0.05	0.1	0.2
Cell line	H1hESC	0.0949	0.2274	0.3023	0.4488		Cell line	H1hESC	0.2788	0.5121	0.649	0.8109
	K562	0.1965	0.4551	0.5606	0.6654			K562	0.4991	0.7275	0.8136	0.8988
	HEPG2	0.1255	0.2677	0.3576	0.481			HEPG2	0.3306	0.5603	0.6904	0.8314
	GBM1	0.0428	0.2224	0.3903	0.5903			GBM1	0.2761	0.6688	0.8461	0.9513

## Sheet: H. GOBPterms_GREAT
Supplementary file 1H. GO Biological Process terms analysis was perfomed using GREAT (http://bejerano.stanford.edu/great/public/html/)
Red cluster
# GREAT version 3.0.0	Species assembly: hg19	Association rule: Basal+extension: 5000 bp upstream, 1000 bp downstream, 1000000 bp max extension, curated regulatory domains included
# Term Name	Binom Rank	Binom Raw P-Value	Binom FDR Q-Val	Binom Fold Enrichment	Binom Observed Region Hits	Binom Region Set Coverage	Hyper Rank	Hyper FDR Q-Val	Hyper Fold Enrichment	Hyper Observed Gene Hits	Hyper Total Genes	Hyper Gene Set Coverage
leukocyte activation involved in immune response	43	4.92397e-05	0.0119549	2.73186	21	0.0244755	136	0.00148036	2.91122	19	88	0.0142003
microtubule-based transport	52	9.20551e-05	0.0184818	2.97624	17	0.0198135	184	0.00669576	2.83864	16	76	0.0119582
cytoskeleton-dependent intracellular transport	60	0.000148018	0.0257551	2.85775	17	0.0198135	233	0.0115439	2.66342	16	81	0.0119582
myeloid cell activation involved in immune response	76	0.000330786	0.0454396	3.89542	10	0.011655	208	0.00851629	4.18455	9	29	0.00672646
JAK-STAT cascade	77	0.000343928	0.0466313	2.99908	14	0.016317	215	0.00897723	3.3021	12	49	0.00896861
Green cluster
# GREAT version 3.0.0	Species assembly: hg19	Association rule: Basal+extension: 5000 bp upstream, 1000 bp downstream, 1000000 bp max extension, curated regulatory domains included
# Term Name	Binom Rank	Binom Raw P-Value	Binom FDR Q-Val	Binom Fold Enrichment	Binom Observed Region Hits	Binom Region Set Coverage	Hyper Rank	Hyper FDR Q-Val	Hyper Fold Enrichment	Hyper Observed Gene Hits	Hyper Total Genes	Hyper Gene Set Coverage
response to nutrient levels	10	3.83415e-08	4.00285e-05	2.01341	72	0.056338	82	0.000681175	1.86485	53	262	0.0270823
cellular response to nutrient levels	35	3.11276e-06	0.000928491	2.5755	31	0.0242567	253	0.0431749	2.00803	22	101	0.0112417
platelet-derived growth factor receptor signaling pathway	73	4.49366e-05	0.00642655	3.04401	18	0.0140845	83	0.000702238	3.99477	13	30	0.00664282
regulation of cell junction assembly	109	0.000226295	0.0216745	2.44598	21	0.0164319	68	0.000560384	3.51189	16	42	0.00817578
regulation of smooth muscle contraction	139	0.000472717	0.0355048	2.36705	20	0.0156494	191	0.0174434	2.746	14	47	0.00715381
positive regulation of muscle contraction	159	0.000615738	0.0404296	2.71051	15	0.0117371	236	0.03793	3.0729	10	30	0.00510986

## Sheet: I. SNPs_Fold-diff
Supplement file 1I. Predicted fold-difference in CSI score between the reference and the alternate allele of GWAS SNPs from Maurano et al. Predicted fold-differences <>2, when F=25, are highlighted.
		bZIP dimer
DiseaseClass	dbSNP	JUN•CEBPG	ATF3•CEBPA	JUN•CEBPA	JUNB•CEBPA	BATF3•CEBPG	BATF•CEBPG	BATF3•CEBPA	ATF3•CEBPG	FOSL1•CEBPG	FOS•CEBPG	ATF5•CEBPE	ATF4•CEBPA	ATF4•CEBPG	ATF5•CEBPA	ATF5•CEBPG	JUNB•CEBPE	FOSL1•CEBPA	JUNB•JUN	FOS•NFE2	NFE2L1	NFE2	FOSL1•ATF3	FOS•ATF3	JUN•ATF3	FOS•NFE2L1	FOSL1•NFE2	JUNB•FOS	JUNB•FOSL1	FOSL1•BATF3	FOS•JUN	FOSL1•JUN	BATF•CEBPE	BATF•CEBPA	FOS•CEBPE	FOSL1•CEBPE	CEBPG	CEBPA	CEBPE	JUNB•CEBPG	DDIT3•CEBPG	DBP	HLF	NFIL3	NFE2•MAFG	NFE2L1•MAFG	MAFB	MAFG	FOS•MAFB
Autoimmune disease	rs17293632	1.29607															1.12565	1.20188	1.29527	1.67397	1.79842	1.6579	1.41161	1.50278	1.61287	1.45388	1.55477	1.76375	1.76783	1.28388	1.44277	1.69162
Autoimmune disease	rs1841770																			-1.54721			-1.24873																						-1.27811
Autoimmune disease	rs6426833																			-1.31066																									-1.19683	-1.3261	-2.0508	-1.81385	-1.80845
Autoimmune disease	rs1953126
Autoimmune disease	rs1325195		1.68937									1.01452	1.39396	1.20367	1.39661	1.40456
Autoimmune disease	rs10259085																																				1.4566	1.26106	1.05129			1.17044		1.26032
Autoimmune disease	rs10995271																		-1.70605
Autoimmune disease	rs979233
Autoimmune disease	rs1876518																																				-2.01243	-1.80827	-1.47439
Autoimmune disease	rs1913517																			1.7367																									1.17992
Autoimmune disease	rs9296015																								-1.16247																				-1.72883	-2.14802
Autoimmune disease	rs9296015																								-1.16247																				-1.72883	-2.14802
Autoimmune disease	rs3771180														1.00734	1.06189
Autoimmune disease	rs6062314
Autoimmune disease	rs10036748
Autoimmune disease	rs10201872																																				1.26867
Autoimmune disease	rs10495903		-1.04593
Autoimmune disease	rs11214966
Autoimmune disease	rs12131057																																				1.10072
Autoimmune disease	rs1335532																1.28447
Autoimmune disease	rs1557351																								1.3452
Autoimmune disease	rs17221417
Autoimmune disease	rs216518		1.05112
Autoimmune disease	rs2233287																								1.02217
Autoimmune disease	rs2412973
Autoimmune disease	rs3132613
Autoimmune disease	rs6074022																																													-1.05781
Autoimmune disease	rs6501384																																								-1.13642
Autoimmune disease	rs7191888																																								1.03148
Autoimmune disease	rs934734						-1.02927
Quantitative traits	rs17081231	-1.46942	-1.76981	-2.13241	-2.22972	-1.97471	-1.61155	-1.68688	-2.13447	-1.96804	-1.9816	-1.62643	-1.24992	-1.89299	-1.99063	-1.95368	-1.08099	-1.38105																			-1.60263	-1.28843	-1.23924	-1.25778
Quantitative traits	rs9487094	-1.08009	-1.5292	-1.28044	-1.11656	-1.68471	-1.70839	-1.68919	-1.2088	-1.39487	-1.54927	-1.7876	-1.14258	-1.20019	-1.66662	-1.58613																							-1.06262
Quantitative traits	rs2814828
Quantitative traits	rs2554380						1.37061	1.18314																									2.22027	2.00649
Quantitative traits	rs3791950																			1.1965			1.15279	1.08421	1.05882
Quantitative traits	rs10433903
Quantitative traits	rs3825199
Quantitative traits	rs10512248												-1.18209			-1.05691
Quantitative traits	rs11957313																																					-1.12902	-1.24839
Quantitative traits	rs12970134																1.42985
Quantitative traits	rs12970134																1.42985
Quantitative traits	rs12970134																1.42985
Quantitative traits	rs13273123																																-1.2676
Quantitative traits	rs1333026
Quantitative traits	rs2282335
Quantitative traits	rs31198						-1.32324
Quantitative traits	rs3782089
Quantitative traits	rs6480314
Quantitative traits	rs6686423																																								1.21306
Quantitative traits	rs724016
Quantitative traits	rs849141
Quantitative traits	rs887912
Serum metabolites	rs10993994
Serum metabolites	rs4446959																																									-1.02099
Serum metabolites	rs1648707																			1.62008			1.2463																						1.44798	1.20614
Serum metabolites	rs6586282
Serum metabolites	rs6919346
Serum metabolites	rs746961		-1.39778										-1.09639		-1.0171	-1.10599
Serum metabolites	rs9727115
Serum metabolites	rs2497306
Serum metabolites	rs972275																																												-1.23991	-1.51564
Serum metabolites	rs1085093																																													-1.08025
Serum metabolites	rs11066453
Serum metabolites	rs1351696
Serum metabolites	rs1976403		1.05236
Serum metabolites	rs3117181																																												-1.0538
Serum metabolites	rs3925584																																				-1.01741
Serum metabolites	rs4236644																								1.2299
Serum metabolites	rs6472866
Serum metabolites	rs6589566
Serum metabolites	rs7117404																																										-1.05388
Serum metabolites	rs8109578
Serum metabolites	rs9820070
Neurological behavioral	rs10994336	-1.2588	-1.51767	-1.47959																																					-1.17228
Neurological behavioral	rs3758354	-1.61563		-1.26364	-1.59483												-1.8907	-1.87309	-1.60924	-1.46443	-1.66305	-1.937	-1.4037	-1.24588		-1.96459	-1.81541	-2.13496	-2.16118	-2.26365	-2.20456	-1.98456													-1.58028	-2.03133
Neurological behavioral	rs931812		-1.6079							-1.11067	-1.4668	-1.0213	-1.30026	-1.02741	-1.52596	-1.68614																					-1.34632	-1.35159	-1.51449
Neurological behavioral	rs10437629
Neurological behavioral	rs1869901		1.04881														1.68218	1.9111																	2.0046	2.00401
Neurological behavioral	rs10894294																			1.22833																									1.24731	1.12041
Neurological behavioral	rs10514718																			-1.53888
Neurological behavioral	rs11130874
Neurological behavioral	rs4923705
Neurological behavioral	rs6437740																																												-1.11033	-1.10758
Neurological behavioral	rs10227331
Neurological behavioral	rs1155865												-1.00158
Neurological behavioral	rs1202199																						-1.06334
Neurological behavioral	rs1625579												1.20093
Neurological behavioral	rs4397449																																													-1.09839
Neurological behavioral	rs4434872												-1.10587
Neurological behavioral	rs7512769
Cardiovascular	rs652889
Cardiovascular	rs11153730		1.63691									1.03098	1.0255	1.27213	1.40591	1.34284
Cardiovascular	rs11153730		1.63691									1.03098	1.0255	1.27213	1.40591	1.34284
Cardiovascular	rs7188697																		1.5535
Cardiovascular	rs13232179																			1.91723																									1.56321	1.41284
Cardiovascular	rs10953541																																2.03979	2.18944
Cardiovascular	rs13300284																																												1.20765	1.81254
Cardiovascular	rs17421627																																								-1.02398
Cardiovascular	rs1746048																				-1.12336				-1.14758
Cardiovascular	rs1746048																				-1.12336				-1.14758
Cardiovascular	rs10499859
Cardiovascular	rs1348582
Cardiovascular	rs1541010
Cardiovascular	rs8015016																			-1.01544
Cardiovascular	rs9298506
Cardiovascular	rs991316
Aging	rs6547705		-1.71287	-1.62397	-1.39479	-2.0333	-1.98012	-2.09646	-1.63949	-1.67377	-1.74328	-1.51944	-1.53891	-1.59768	-1.91726	-1.91792		-1.03663																			-1.33286	-1.15204	-1.29323	-1.51964
Aging	rs7227401																		-1.77387
Aging	rs12151790
Aging	rs2639889																																												-1.73842	-1.89704
Aging	rs7561528																																												-1.37862	-1.08228
Aging	rs7631605																								1.7245
Aging	rs1364063
Aging	rs16856202
Aging	rs356219
Aging	rs356220
Aging	rs7577851																																						1.20586
Aging	rs9918508
Cancer	rs10993994
Cancer	rs3112612						1.10513	1.07602
Cancer	rs7105934				-1.15337							-1.17738			-1.21869	-1.14816
Cancer	rs1512268																																				1.9623	2.15431	2.09985
Cancer	rs10058728		1.31355
Cancer	rs563507														1.10846	1.08943
Cancer	rs7176508																		1.46471
Cancer	rs12653946																																													-1.03052
Cancer	rs1656402
Cancer	rs1722784
Cancer	rs2089222																																								-1.07367
Cancer	rs2456449
Drug metabolism	rs7046653
Drug metabolism	rs10458561
Drug metabolism	rs4410790											-1.69549	-1.3376	-1.11078	-1.50624	-1.47333
Drug metabolism	rs10950821																2.1541																		1.45967	1.26152
Drug metabolism	rs7128311																																				-1.20701	-1.56426	-1.5241
Drug metabolism	rs11663206																																										1.04235
Drug metabolism	rs2725236																																				1.12957
Drug metabolism	rs7136572																																								1.19454
Drug metabolism	rs993648						1.13982
Kidney lung liver	rs11727189																		1.85145
Kidney lung liver	rs12344488		-1.31926									-1.2133	-1.46797		-1.61766	-1.68043
Kidney lung liver	rs7905537																				1.53751	1.44947
Kidney lung liver	rs1012036
Kidney lung liver	rs12899618												1.12797
Kidney lung liver	rs4237591																																													-1.05724
Diabetes	rs8035957
Diabetes	rs10965250						1.10726
Diabetes	rs1153188																																								-1.03966
Diabetes	rs7578326																																						1.16945
Hematological parameters	rs6693017																																															-1.01386
Hematological parameters	rs2336384		1.20104
Hematological parameters	rs11970772
Hematological parameters	rs525455																																								-1.08712
Radiographic parameters	rs1471403
Radiographic parameters	rs1471403
Radiographic parameters	rs10510628
Miscellaneous	rs17043947																																				1.17147	1.61112	1.74832
Miscellaneous	rs2833607
Viral disease	rs285757
Viral disease	rs2870137
Miscellaneous	rs958798																																								-1.02205
Parasitic bacterial disease	rs3762318						1.06045																														1.04918
Viral disease	rs4838508
[truncated: 54 more columns]
