# Supplementary figures and images for: Combinatorial bZIP dimers display complex DNA-binding specificity landscapes
Source: eLife journal article supplement (doi:10.7554/elife.19272), 2017-02-10

## A Cognate Site Identification by SELEX-Seq

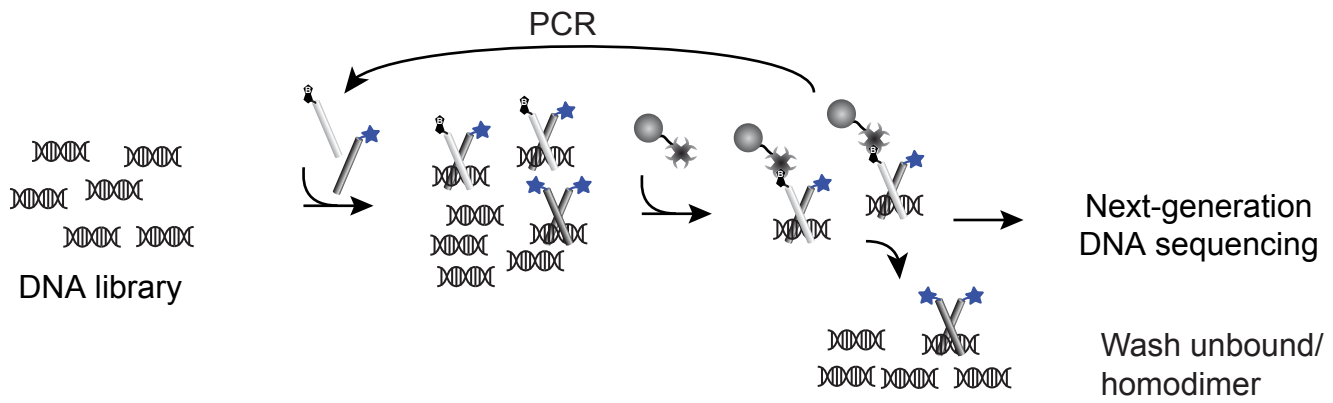

## B Replicate experiments

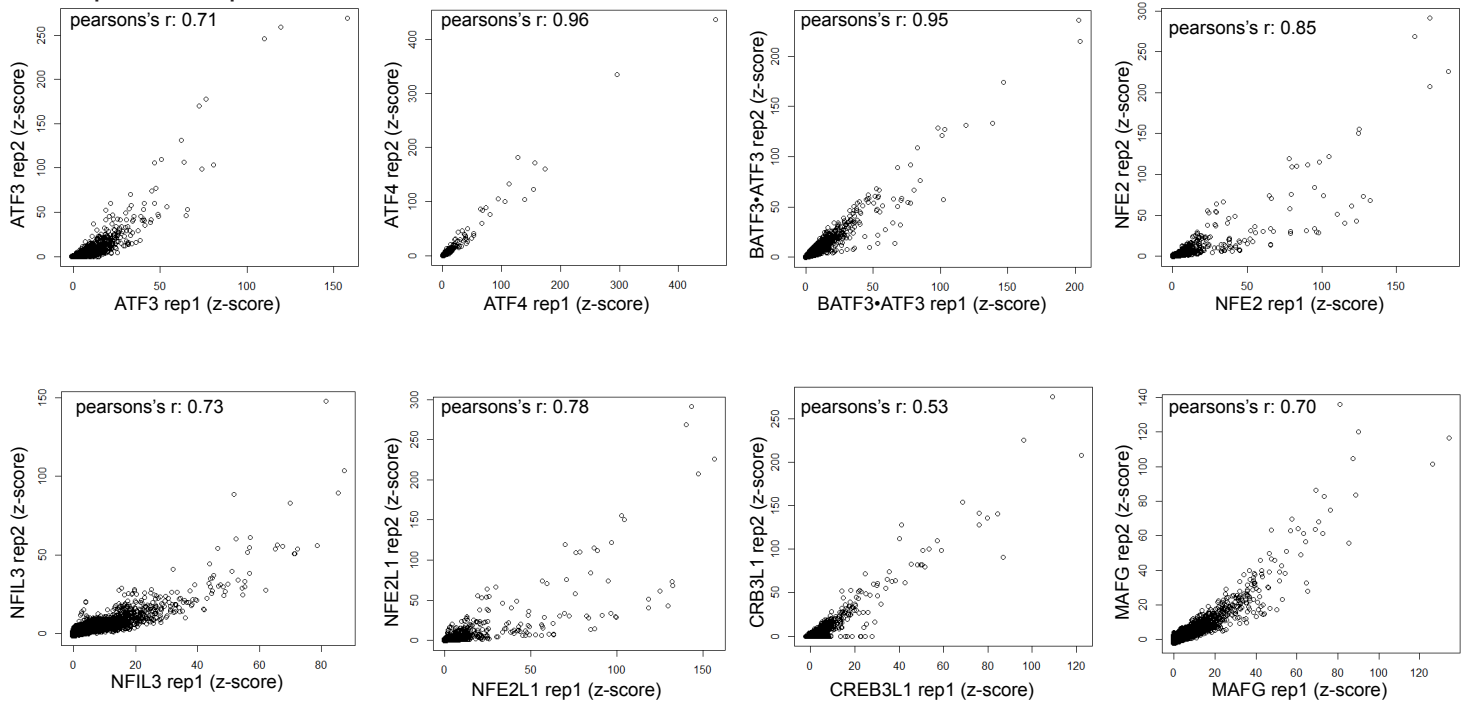

## C Reciprocal experiments

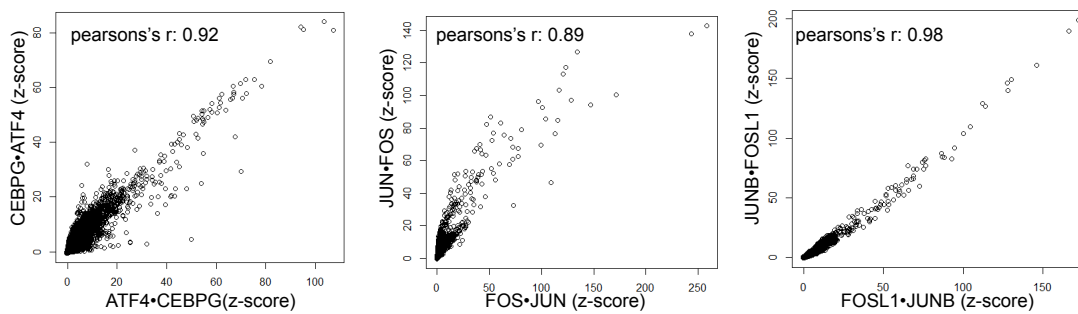

Supplement: supp [file elife-19272-supp-v1.zip › elife_poa_e19272_Figure_1_figure_supplement_1.pdf]

Figure 3-figure supplement 2

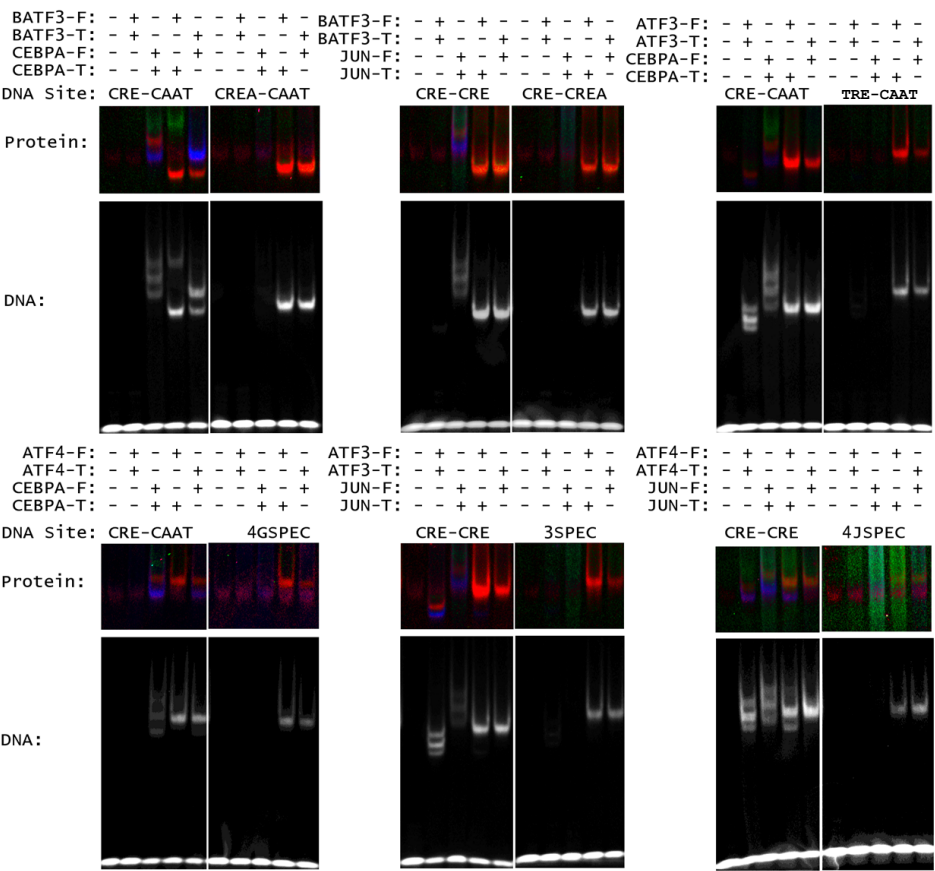

Supplement: supp [file elife-19272-supp-v1.zip › elife_poa_e19272_Figure_3_figure_supplement_2.pdf]

**A**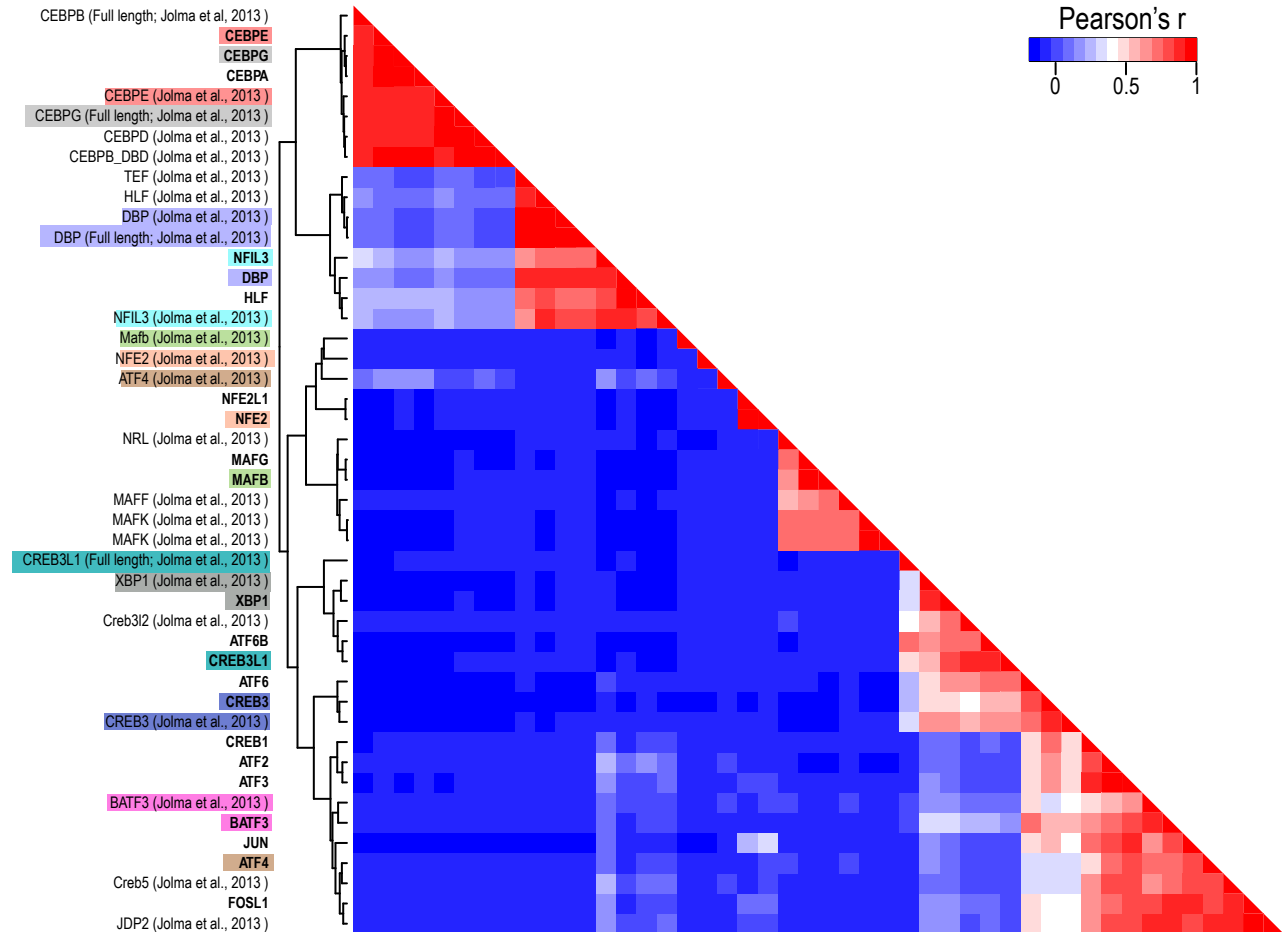**B**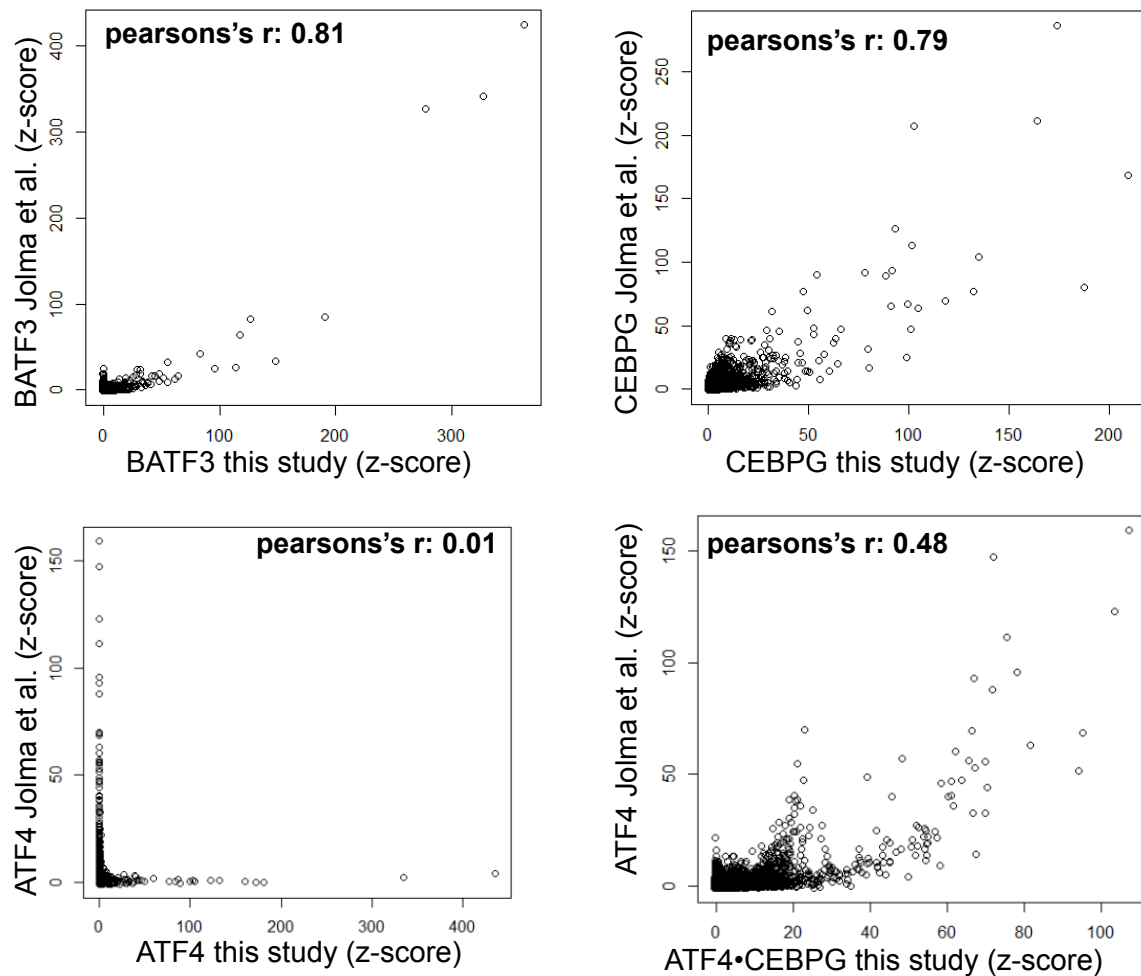

Supplement: supp [file elife-19272-supp-v1.zip › elife_poa_e19272_Figure_1_figure_supplement_3.pdf]

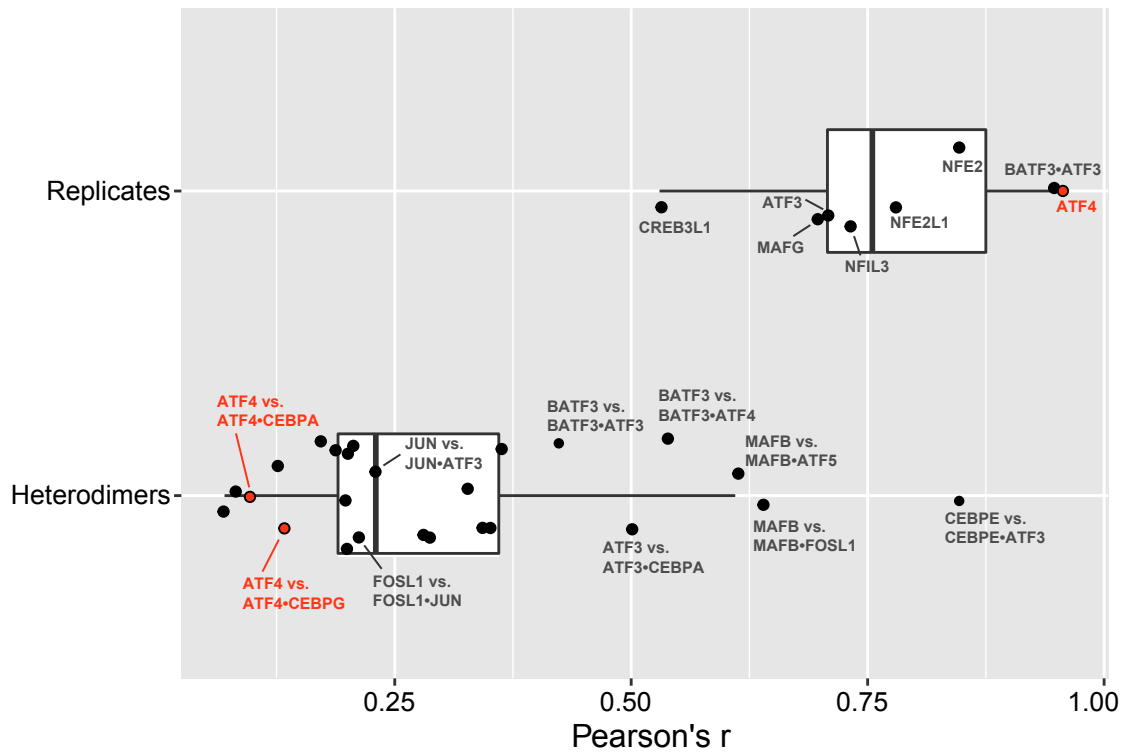

Supplement: supp [file elife-19272-supp-v1.zip › elife_poa_e19272_Figure_1_figure_supplement_4.pdf]

Figure 7-figure supplement 1

A

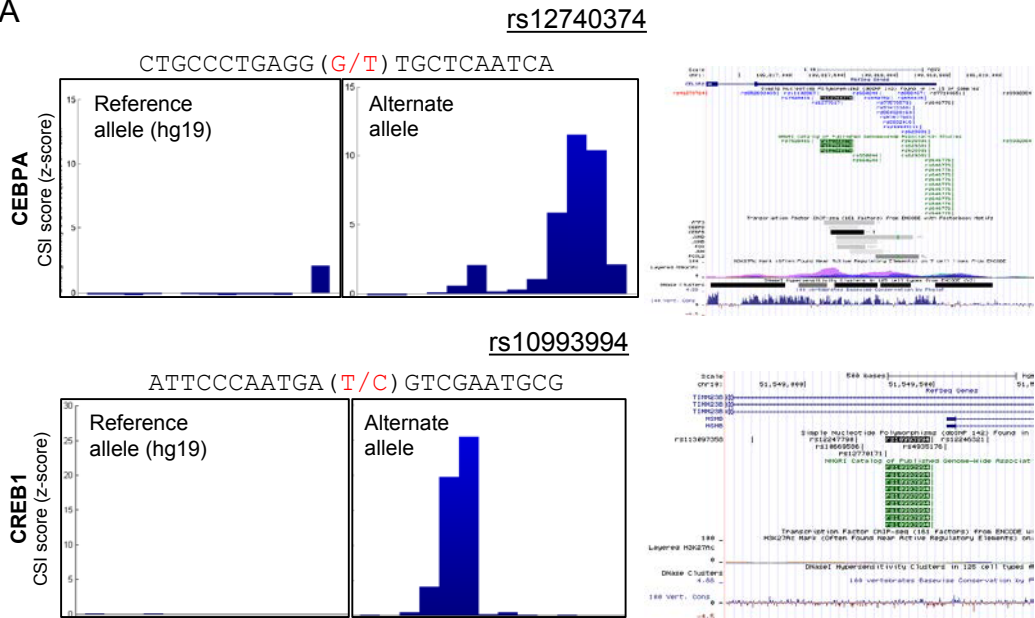

B

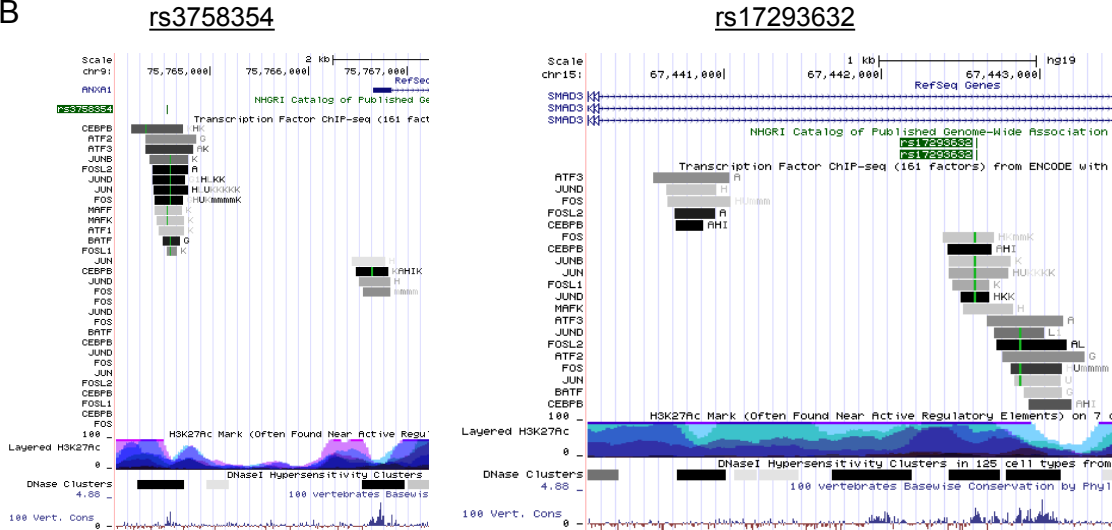

Supplement: supp [file elife-19272-supp-v1.zip › elife_poa_e19272_Figure_7_figure_supplement_1.pdf]

Figure 3-figure supplement 1

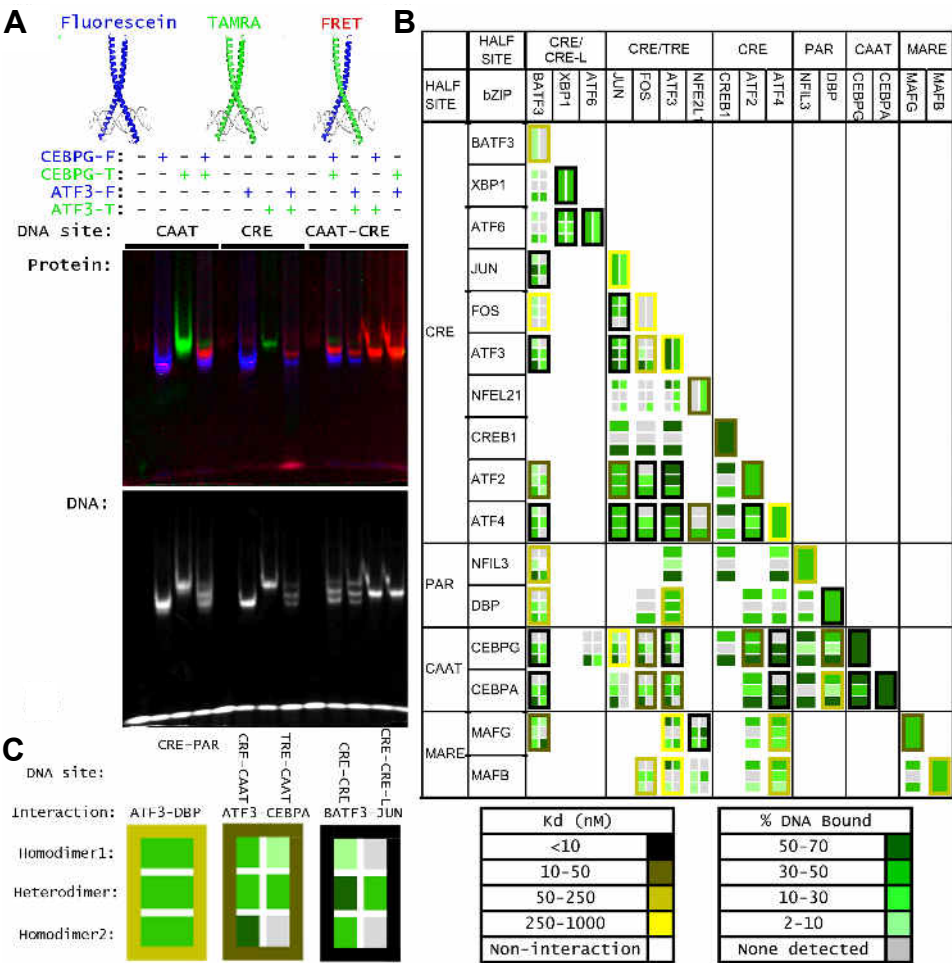

Supplement: supp [file elife-19272-supp-v1.zip › elife_poa_e19272_Figure_3_figure_supplement_1.pdf]

Figure 5-figure supplement 1

**A** bZIP heterodimers

K562

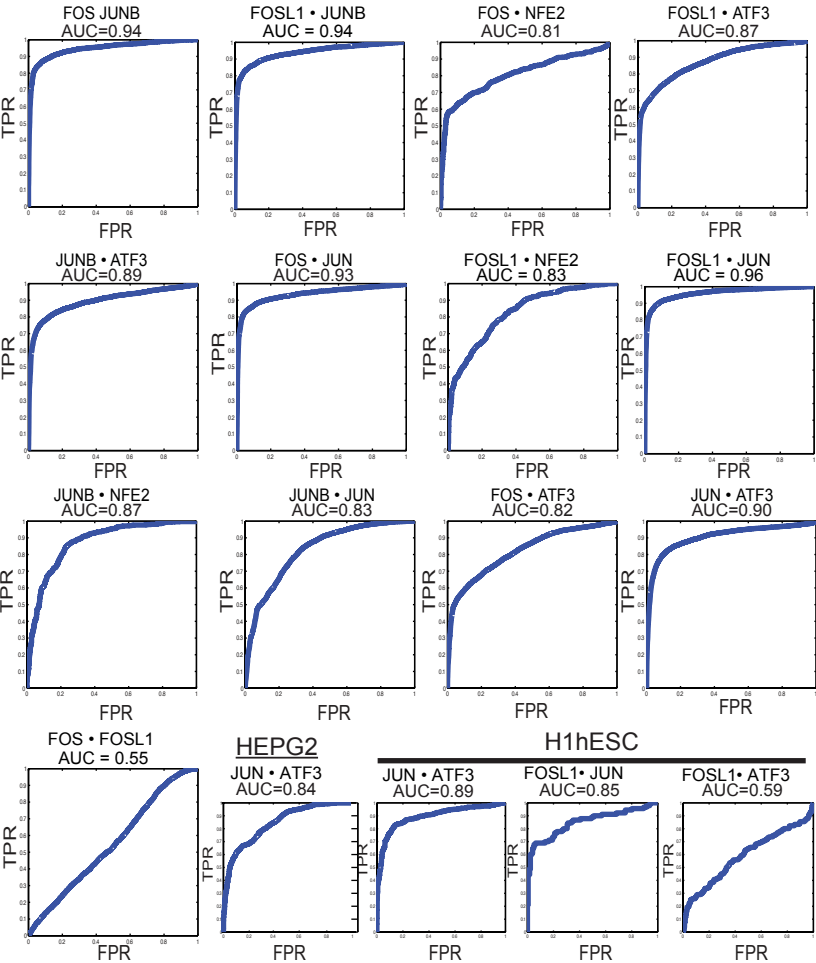

**B** bZIP homodimers

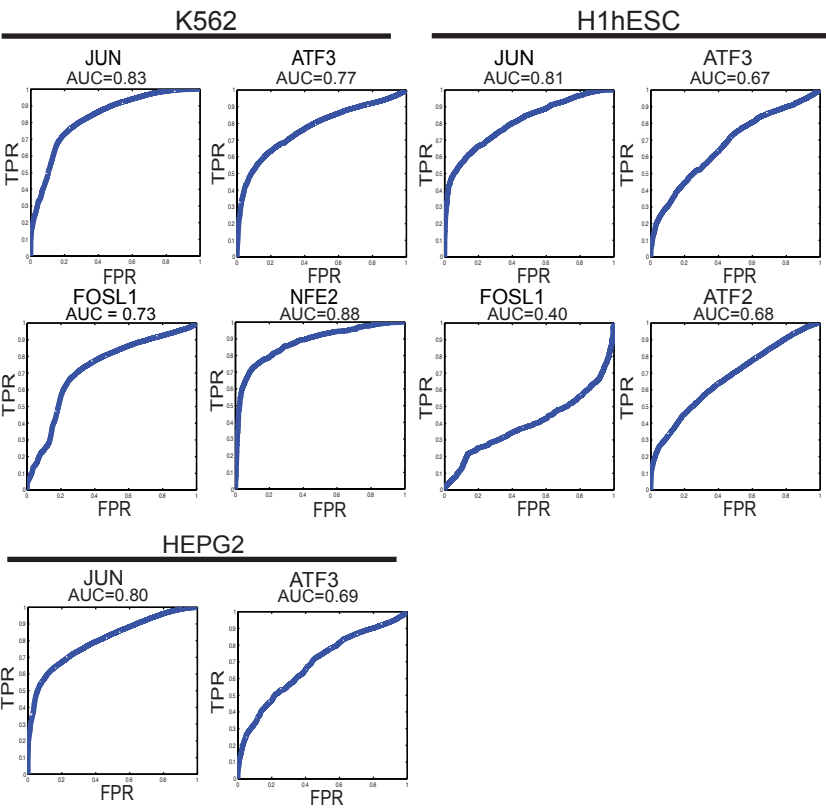

Supplement: supp [file elife-19272-supp-v1.zip › elife_poa_e19272_Figure_5_figure_supplement_1.pdf]

Figure 6-figure supplement 1

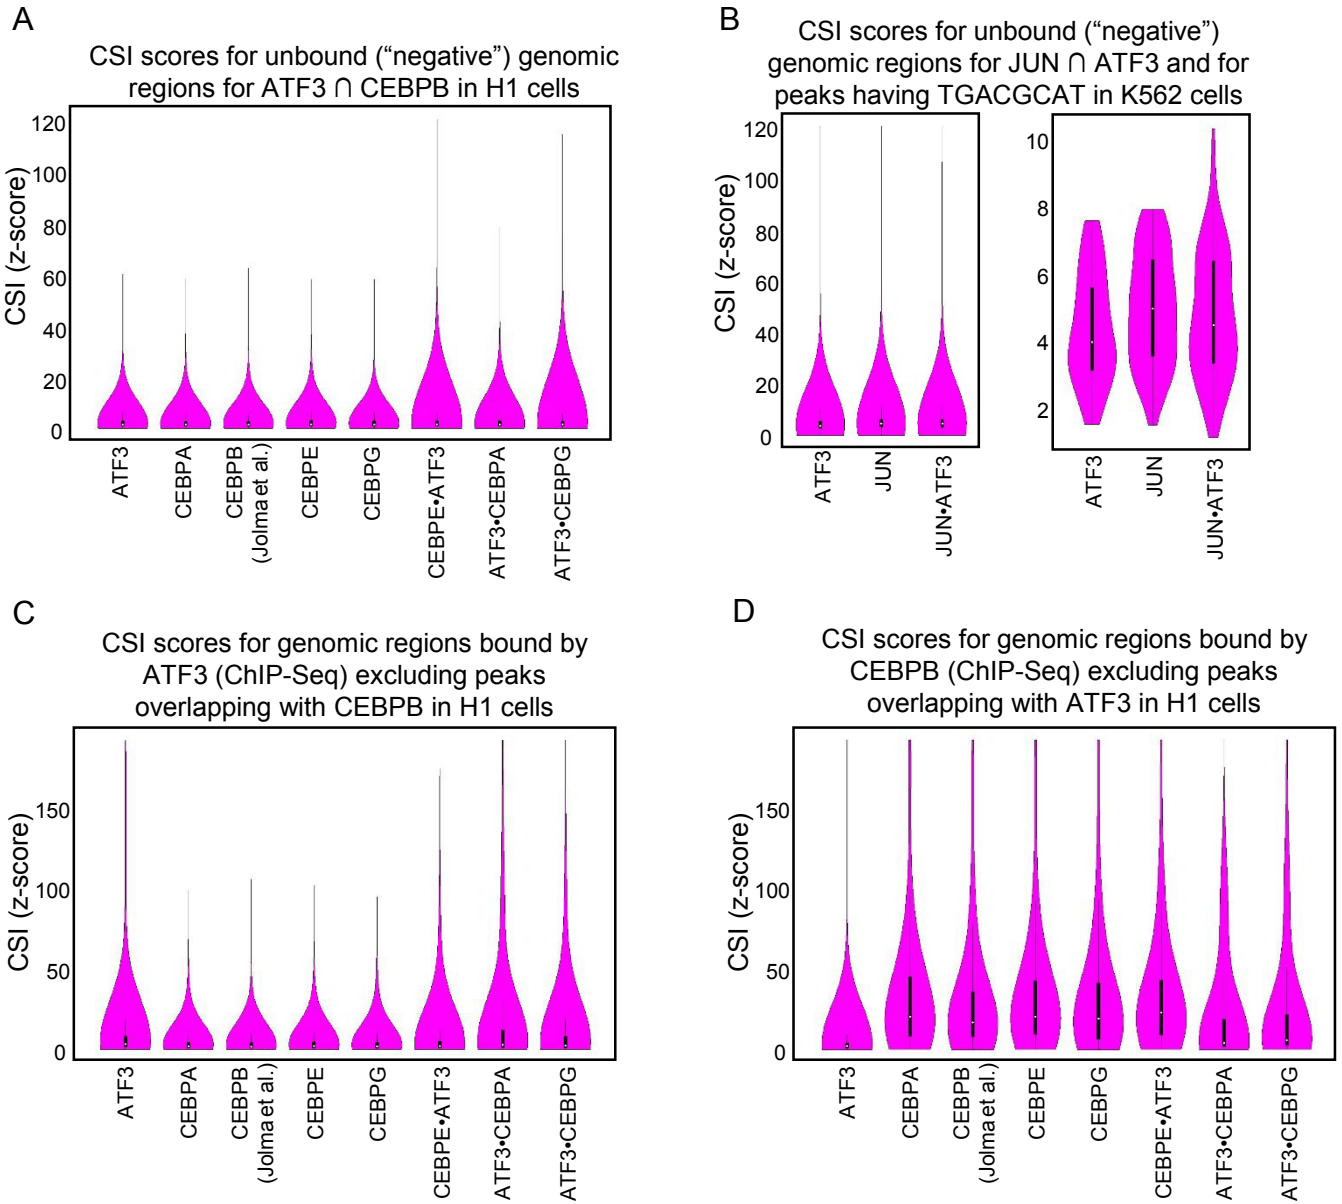

Supplement: supp [file elife-19272-supp-v1.zip › elife_poa_e19272_Figure_6_figure_supplement_1.pdf]
